# Supplementary material for: Temperature sensitivity of the interspecific interaction strength of coastal marine fish communities
Source: eLife. 2023 Jul 11;12:RP85795. doi: 10.7554/eLife.85795 (PMC10393047; doi:10.7554/eLife.85795)
Supplement: Supplementary file 1. — (a) List of species detected from MiFish environmental DNA (eDNA) metabarcoding with raw numbers of reads. (b) A faunal inventory of the coastal marine fishes of Chiba prefecture compiled from museum collections and literature surveys. Museum acronyms are Natural History Museum and Institute, Chiba (CBM) and its coastal branch (CHMH), National Museum of Nature and Science, Tokyo (NSMT), Kanagawa Prefectural Museum of Natural History (KPM), and Yokosuka City Museum (YCM). All references can be found in the footnote. (c) Top 20 fish–fish interactions based on UIC and their interpretations. (d) Results of GAMM between interaction strengths and environmental and ecological properties. [file elife-85795-supp1.xlsx]

## Sheet: supplementary file 1a
Supplementary file 1a. List of species detected from MiFish eDNA metabarcoding with raw numbers of reads.
Family	Scientific Name	No. Reads	Frequency	065-BP01-St01-Isumi_S65	066-BP01-St02-Katsuura_S66	067-BP01-St03-Kominato_S67	068-BP01-St04-Emi_S68	069-BP01-St05-Chikura_S69	070-BP01-St06-Mera_S70	071-BP01-St07-Banda_S71	072-BP01-St08-Taibusa_S72	073-BP01-St09-Nishigasaki_S73	074-BP01-St10-Myogane_S74	075-BP01-St11-Tsuhama_S75	081-BP02-St01-Isumi_S81	082-BP02-St02-Katsuura_S82	083-BP02-St03-Kominato_S83	084-BP02-St04-Emi_S84	085-BP02-St05-Chikura_S85	086-BP02-St06-Mera_S86	087-BP02-St07-Banda_S87	088-BP02-St08-Taibusa_S88	089-BP02-St09-Nishigasaki_S89	090-BP02-St10-Myogane_S90	091-BP02-St11-Tsuhama_S91	097-BP03-St01-Isumi_S97	098-BP03-St02-Katsuura_S98	099-BP03-St03-Kominato_S99	100-BP03-St04-Emi_S100	101-BP03-St05-Chikura_S101	102-BP03-St06-Mera_S102	103-BP03-St07-Banda_S103	104-BP03-St08-Taibusa_S104	105-BP03-St09-Nishigasaki_S105	106-BP03-St10-Myogane_S106	107-BP03-St11-Tsuhama_S107	113-BP04-St01-Isumi_S113	114-BP04-St02-Katsuura_S114	115-BP04-St03-Kominato_S115	116-BP04-St04-Emi_S116	117-BP04-St05-Chikura_S117	118-BP04-St06-Mera_S118	119-BP04-St07-Banda_S119	120-BP04-St08-Taibusa_S120	121-BP04-St09-Nishigasaki_S121	122-BP04-St10-Myogane_S122	123-BP04-St11-Tsuhama_S123	129-BP05-St01-Isumi_S1	130-BP05-St02-Katsuura_S2
040_Squatinidae	Squatina japonica	97	2	0	0	0	0	0	0	0	0	0	0	0	0	0	0	0	0	0	0	0	0	0	0	0	0	0	0	0	0	0	0	0	0	0	0	0	0	0	0	0	0	0	0	0	0	0	0
074_Anguillidae	Anguilla japonica	387	9	0	0	0	0	0	0	0	0	0	0	0	0	0	0	0	0	0	0	0	0	0	0	0	0	0	0	0	0	0	0	0	0	0	0	0	0	0	0	0	0	0	0	0	0	0	0
074_Anguillidae	Anguilla marmorata	17	1	0	0	0	0	0	0	0	0	0	0	0	0	0	0	0	0	0	0	0	0	0	0	0	0	0	0	0	0	0	0	0	0	0	0	0	0	0	0	0	0	0	0	0	0	0	0
079_Muraenidae	Anarchias sp Ansp	1892	23	0	0	0	40	0	0	0	0	0	0	0	0	0	23	12	0	0	0	0	0	0	0	0	0	0	0	0	0	0	0	0	0	0	0	0	0	0	0	0	0	0	0	0	0	0	0
079_Muraenidae	Echidna xanthospilos	223	4	0	0	0	0	0	0	0	0	0	0	0	0	0	0	0	0	0	0	0	0	0	0	0	0	0	0	0	0	0	0	0	0	0	0	0	0	0	0	0	0	0	0	0	0	0	0
079_Muraenidae	Enchelycore anatina	75	3	0	0	0	0	0	0	0	0	0	0	0	0	0	0	0	0	0	0	0	0	0	0	0	0	0	0	0	0	0	0	0	0	0	0	0	0	0	0	0	0	0	0	0	0	0	0
079_Muraenidae	Enchelycore anatina gotu1	487	9	0	0	0	0	0	0	0	0	0	0	0	0	0	0	0	0	0	0	0	0	0	0	0	0	0	0	0	0	0	0	0	0	0	0	0	0	0	0	0	0	0	0	0	0	0	0
079_Muraenidae	Enchelycore pardalis	18932	153	0	0	0	21	36	0	22	30	44	0	0	0	0	0	12	0	20	73	0	0	0	0	0	0	27	0	32	0	38	0	0	0	0	0	0	85	0	0	0	89	0	0	0	0	0	0
079_Muraenidae	Gymnothorax chilospilus	83	2	0	0	0	0	0	0	0	0	0	0	0	0	0	0	0	0	0	0	0	0	0	0	0	0	0	0	0	0	0	0	0	0	0	0	0	0	0	0	0	0	0	0	0	0	0	0
079_Muraenidae	Gymnothorax eurostus	191	2	0	0	0	0	0	0	0	0	0	0	0	0	0	0	0	0	0	0	0	0	0	0	0	0	0	0	0	0	0	0	0	0	0	0	0	0	0	0	0	0	0	0	0	0	0	0
079_Muraenidae	Gymnothorax isingteena	43	1	0	0	0	0	0	0	0	0	0	0	0	0	0	0	0	0	0	0	0	0	0	0	0	0	0	0	0	0	0	0	0	0	0	0	0	0	0	0	0	0	0	0	0	0	0	0
079_Muraenidae	Gymnothorax kidako	217908	408	0	0	176	336	721	295	28	166	15	16	0	0	68	170	393	673	261	253	138	79	0	0	0	335	115	248	275	277	141	53	0	42	0	0	226	225	290	769	156	122	596	0	0	0	0	84
079_Muraenidae	Gymnothorax kidako gotu1	957	16	0	0	0	0	0	0	0	0	0	0	0	0	0	0	0	0	0	0	0	0	0	0	0	0	0	0	18	0	0	0	0	0	0	0	0	0	0	0	0	0	0	0	0	0	0	0
079_Muraenidae	Gymnothorax leucostigma	54	1	0	0	0	0	0	0	0	0	0	0	0	0	0	0	0	0	0	0	0	0	0	0	0	0	0	0	0	0	0	0	0	0	0	0	0	0	0	0	0	0	0	0	0	0	0	0
079_Muraenidae	Gymnothorax meleagris	41	1	0	0	0	0	0	0	0	0	0	0	0	0	0	0	0	0	0	0	0	0	0	0	0	0	0	0	0	0	0	0	0	0	0	0	0	0	0	0	0	0	0	0	0	0	0	0
079_Muraenidae	Gymnothorax phasmatodes	62	1	0	0	0	0	0	0	0	0	0	0	0	0	0	0	0	0	0	0	0	0	0	0	0	0	0	0	0	0	0	0	0	0	0	0	0	0	0	0	0	0	0	0	0	0	0	0
079_Muraenidae	Gymnothorax pictus	385	1	0	0	0	0	0	0	0	0	0	0	0	0	0	0	0	0	0	0	0	0	0	0	0	0	0	0	0	0	0	0	0	0	0	0	0	0	0	0	0	0	0	0	0	0	0	0
079_Muraenidae	Gymnothorax reticularis	440	7	0	0	0	0	0	0	0	0	0	0	0	0	0	0	0	0	0	0	0	0	0	0	0	0	0	0	0	0	0	0	0	59	0	0	0	0	0	0	0	0	0	0	0	0	0	0
079_Muraenidae	Gymnothorax thyrsoideus	50	1	0	0	0	0	0	0	0	0	0	0	0	0	0	0	0	0	0	0	0	0	0	0	0	0	0	0	0	0	0	0	0	0	0	0	0	0	0	0	0	0	0	0	0	0	0	50
081_Ophichthidae	Brachysomophis crocodilinus	31	2	0	0	0	0	0	0	0	0	0	0	0	0	0	0	0	0	0	0	0	16	0	0	0	0	0	0	0	0	0	0	0	0	0	0	0	0	0	0	0	0	0	0	0	0	0	0
081_Ophichthidae	Brachysomophis crocodilinus	22	1	0	0	0	0	0	0	0	0	0	0	0	0	0	0	0	0	0	0	0	0	0	0	0	0	0	0	0	0	0	0	0	0	0	0	0	0	0	0	0	0	0	0	0	0	0	0
081_Ophichthidae	Echelus myrus	50	1	0	0	0	0	0	0	0	0	0	0	0	0	0	0	0	0	0	0	0	0	0	0	0	0	0	0	0	0	0	0	0	0	0	0	0	0	0	0	0	0	0	0	0	0	0	0
081_Ophichthidae	Ophichthus erabo	233	4	0	0	0	0	0	0	0	0	0	0	0	0	0	0	0	0	0	0	0	100	0	0	0	0	0	0	0	0	0	0	93	0	0	0	0	0	0	0	0	0	0	0	0	0	0	0
081_Ophichthidae	Ophisurus macrorhynchos	1247	11	0	0	0	0	0	0	0	0	0	0	0	0	0	0	0	0	0	0	0	0	20	0	0	0	0	0	0	0	0	0	0	0	15	0	0	0	0	0	0	0	0	0	0	0	937	0
081_Ophichthidae	Pisodonophis zophistius	210	7	0	0	0	0	0	0	0	0	0	0	0	0	0	0	0	0	0	0	0	0	0	0	0	0	0	0	0	0	0	0	0	0	0	0	0	0	0	0	0	0	0	0	0	0	0	0
086_Congridae	Gnathophis bathytopos	22	2	0	0	0	0	0	0	0	0	0	0	0	0	0	0	0	0	0	0	0	0	0	0	0	0	0	0	0	0	0	0	0	0	0	0	0	0	0	0	0	0	0	0	0	0	0	0
086_Congridae	Gnathophis bathytopos gotu1	62	1	0	0	0	0	0	0	0	0	0	0	0	0	0	0	0	0	0	0	0	0	0	0	0	0	0	0	0	0	0	0	0	0	0	0	0	0	0	0	0	0	0	0	0	0	0	0
086_Congridae	Gnathophis bathytopos gotu2	6	1	0	0	0	0	0	0	0	0	0	0	0	0	0	0	0	0	0	0	0	0	0	0	0	0	0	0	0	0	0	0	0	0	0	0	0	0	0	0	0	0	0	0	0	0	0	0
086_Congridae	Gnathophis nystromi	339	8	0	0	0	0	0	0	0	0	0	0	0	0	0	21	0	0	0	0	0	0	0	0	0	0	0	0	0	0	0	0	0	0	0	0	0	0	0	0	0	0	0	0	0	0	0	0
095_Engraulidae	Encrasicholina punctifer	2914	17	0	0	0	0	0	0	0	0	0	0	0	0	0	0	0	0	0	0	0	0	0	0	0	0	0	0	0	0	0	0	0	0	0	0	0	0	0	0	0	0	0	0	0	0	0	0
095_Engraulidae	Engraulis japonicus	419069	378	342	0	53	0	143	0	21	184	38	295	3004	41	0	0	19	0	30	0	66	70	13	11	1073	199	21	25	53	0	0	11	0	0	11	741	0	0	0	0	50	0	0	0	182	0	246	63
095_Engraulidae	Engraulis japonicus gotu1	134	1	0	0	0	0	0	0	0	0	0	0	0	0	0	0	0	0	0	0	0	0	0	0	0	0	0	0	0	0	0	0	0	0	0	0	0	0	0	0	0	0	0	0	0	0	0	0
095_Engraulidae	Engraulis japonicus gotu2	16	1	0	0	0	0	0	0	0	0	0	0	0	0	0	0	0	0	0	0	0	0	0	0	0	0	0	0	0	0	0	0	0	0	0	0	0	0	0	0	0	0	0	0	0	0	0	0
095_Engraulidae	Engraulis japonicus gotu3	8	1	0	0	0	0	0	0	0	0	0	0	0	0	0	0	0	0	0	0	0	0	0	0	0	0	0	0	0	0	0	0	0	0	0	0	0	0	0	0	0	0	0	0	0	0	0	0
097_Clupeidae	Etrumeus teres	65691	226	430	0	0	153	138	0	25	2759	0	5979	1680	0	0	0	0	21	0	150	20	231	246	30	0	0	0	0	0	0	74	0	0	0	0	0	0	0	2117	0	94	0	82	0	0	49	0	0
097_Clupeidae	Konosirus punctatus	65346	71	0	0	0	0	0	0	0	0	0	0	183	0	0	0	0	0	0	0	0	0	0	120	0	0	0	0	0	0	0	0	0	0	117	0	0	0	0	0	0	0	0	0	0	308	0	0
097_Clupeidae	Nematalosa nasus	115	2	0	0	0	0	0	0	0	0	0	0	0	0	0	0	0	0	0	0	0	0	0	0	0	0	0	0	0	0	0	0	0	0	0	0	0	0	0	0	0	0	0	0	0	0	0	0
097_Clupeidae	Sardinella lemuru	9542	30	0	0	0	0	0	0	0	0	0	0	218	0	0	0	0	0	0	0	0	98	0	0	0	0	0	0	0	0	0	0	0	0	0	0	0	0	0	0	0	0	0	0	0	0	0	0
097_Clupeidae	Sardinella lemuru gotu1	197	2	0	0	0	0	0	0	0	0	0	0	0	0	0	0	0	0	0	0	0	0	0	0	0	0	0	0	0	0	0	0	0	0	0	0	0	0	0	0	0	0	0	0	0	0	0	0
097_Clupeidae	Sardinops melanostictus	178151	253	0	0	0	0	0	0	0	0	0	91	0	0	0	0	0	0	0	0	0	405	0	0	0	0	0	0	0	0	0	0	0	0	0	0	0	0	0	0	0	0	0	181	0	427	0	0
097_Clupeidae	Spratelloides gracilis	186442	148	0	18	0	0	0	189	279	76	668	689	0	0	0	0	75	67	1686	1036	176	2255	150	0	0	0	18	0	0	0	2662	4036	3953	400	977	0	0	18	0	0	83	259	401	4467	229	0	458	0
097_Clupeidae	Spratelloides gracilis gotu1	3553	35	0	0	0	0	0	0	24	0	0	0	0	0	0	0	0	0	0	16	0	51	0	0	0	0	0	0	0	0	68	107	62	0	0	0	0	0	0	0	0	0	0	0	0	0	0	0
097_Clupeidae	Spratelloides gracilis gotu2	34	1	0	0	0	0	0	0	0	0	0	0	0	0	0	0	0	0	0	0	0	0	0	0	0	0	0	0	0	0	0	0	0	0	0	0	0	0	0	0	0	0	0	0	0	0	0	0
102_Cyprinidae	Tribolodon brandtii	9395	5	0	0	0	0	0	0	0	0	0	0	60	0	0	0	0	0	0	0	0	0	0	0	0	0	0	0	0	0	0	0	0	0	0	0	0	0	0	0	0	0	0	0	0	0	0	0
102_Cyprinidae	Tribolodon hakonensis	1526	14	0	0	0	0	0	0	0	0	0	0	0	0	0	0	0	0	0	0	0	0	0	0	0	0	0	0	0	0	0	0	0	0	0	0	25	0	26	0	0	0	0	0	0	0	0	0
151_Plotosidae	Plotosus japonicus	15584	147	0	207	0	0	0	0	0	27	0	100	20	0	98	13	0	0	0	11	0	14	181	0	0	35	0	0	0	0	11	63	24	309	0	0	22	0	0	0	15	167	31	0	67	70	0	0
172_Osmeridae	Plecoglossus altivelis	791	13	0	0	0	0	0	0	0	0	0	0	0	0	0	0	0	0	0	0	0	0	0	0	0	0	0	0	0	0	0	0	0	0	0	0	0	0	0	0	0	0	0	0	0	0	0	0
172_Osmeridae	Salangichthys ishikawae	9065	33	237	0	0	0	0	0	0	0	0	0	53	70	0	0	0	0	0	0	0	0	0	0	628	0	0	0	0	0	0	0	0	0	0	60	0	0	0	0	0	0	0	0	0	0	0	0
172_Osmeridae	Salangichthys microdon	39	1	0	0	0	0	0	0	0	0	0	0	0	0	0	0	0	0	0	0	0	0	0	0	0	0	0	0	0	0	0	0	0	0	0	0	0	0	0	0	0	0	0	0	0	0	0	0
175_Salmonidae	Oncorhynchus keta	428	5	0	0	0	0	0	0	0	0	0	0	0	0	0	0	0	0	0	0	0	0	0	0	0	0	0	0	0	0	0	0	0	0	0	0	0	0	0	0	0	0	0	0	0	0	0	0
187_Synodontidae	Saurida elongata	326	8	0	0	0	0	0	0	0	0	0	0	0	0	0	0	0	0	0	0	0	0	0	0	0	0	0	0	0	0	0	0	0	0	0	0	0	0	0	0	0	0	0	0	0	0	0	0
187_Synodontidae	Saurida spp.	88	4	0	0	0	0	0	0	0	0	0	0	0	0	0	0	0	0	0	0	0	0	0	0	0	0	0	0	0	0	0	0	0	0	0	0	0	0	0	0	0	0	0	0	0	0	0	0
187_Synodontidae	Saurida wanieso	78	2	0	0	0	0	0	0	0	0	0	0	0	0	0	0	0	0	0	0	0	0	0	0	0	0	0	0	0	0	0	0	0	0	0	0	0	0	0	0	0	0	0	0	0	0	0	0
187_Synodontidae	Synodus hoshinonis	17	1	0	0	0	0	0	0	0	0	0	0	0	0	0	0	0	0	0	0	0	0	0	0	0	0	0	0	0	0	0	0	0	0	0	0	0	0	0	0	0	0	0	0	0	0	0	0
222_Ophidiidae	Brotula multibarbata	985	21	0	0	0	0	0	0	0	0	0	0	0	0	0	90	0	0	0	0	0	0	0	0	0	0	0	0	0	0	0	0	0	0	0	0	0	0	0	0	0	0	0	0	0	0	0	0
222_Ophidiidae	Brotula sp CBM ZF 15570 gotu1	66	2	0	0	0	0	0	0	0	0	0	0	0	0	0	0	0	0	0	0	0	0	0	0	0	0	0	0	0	0	0	0	0	0	0	0	0	0	0	0	0	0	0	0	0	0	0	0
227_Lophiidae	Lophiomus setigerus	17	1	0	0	0	0	0	0	0	0	0	0	0	0	0	0	0	0	0	0	0	0	0	0	0	0	0	0	0	0	0	0	0	0	0	0	0	0	0	0	0	0	0	0	0	0	0	0
227_Lophiidae	Lophius litulon	190	4	0	0	0	0	0	0	0	0	0	0	0	0	0	0	0	0	0	0	0	0	0	0	0	0	0	0	0	0	0	0	0	0	0	0	0	0	0	0	0	0	0	0	0	0	0	0
228_Antennariidae	Antennarius hispidus	289	2	0	0	0	0	0	0	0	0	0	0	0	0	0	0	0	0	0	0	0	0	0	0	0	0	0	0	0	0	0	0	0	0	0	0	0	0	0	0	0	0	0	0	0	0	0	0
228_Antennariidae	Antennarius striatus	159	1	0	0	0	0	0	0	0	0	0	0	0	0	0	0	0	0	0	0	0	0	0	0	0	0	0	0	0	0	0	0	0	0	0	0	0	0	0	0	0	0	0	0	0	0	0	0
228_Antennariidae	Antennarius striatus Genetype1	18	1	0	0	0	0	0	0	18	0	0	0	0	0	0	0	0	0	0	0	0	0	0	0	0	0	0	0	0	0	0	0	0	0	0	0	0	0	0	0	0	0	0	0	0	0	0	0
228_Antennariidae	Antennatus nummifer	826	1	0	0	0	0	0	0	0	0	0	0	0	0	0	0	0	0	0	0	0	0	0	0	0	0	0	0	0	0	0	0	0	0	0	0	0	0	0	0	0	0	0	0	0	0	0	0
245_Mugilidae	Ellochelon vaigiensis	9	1	0	0	0	0	0	0	0	0	0	0	0	0	0	0	0	0	0	0	0	0	0	0	0	0	0	0	0	0	0	0	0	0	0	0	0	0	0	0	0	0	0	0	0	0	0	0
245_Mugilidae	Liza affinis	432	9	0	0	0	0	0	0	0	0	0	0	0	0	0	0	0	0	0	0	0	0	0	0	0	0	0	0	0	0	0	0	0	0	0	0	0	0	0	0	0	0	0	0	0	0	0	0
245_Mugilidae	Liza haematocheila	1830	6	0	0	0	0	0	0	0	0	0	0	0	0	0	0	0	0	0	0	0	0	0	0	0	0	0	0	0	0	0	0	0	0	0	0	0	0	0	0	0	0	0	0	0	0	0	0
245_Mugilidae	Liza macrolepis	180	4	0	0	0	0	0	0	0	0	0	0	0	0	0	0	0	0	0	0	0	0	0	0	0	0	0	0	0	0	0	0	0	0	0	0	0	0	0	0	0	0	0	0	0	0	0	0
245_Mugilidae	Moolgarda seheli	293	6	0	0	0	0	0	0	0	0	0	0	0	0	0	0	0	0	0	0	0	0	0	0	0	0	0	0	0	0	0	0	0	0	0	0	0	0	0	0	0	0	0	0	0	0	0	0
245_Mugilidae	Mugil cephalus	302196	416	24	167	56	0	139	74	211	54	0	0	1687	240	424	19	1239	116	412	263	0	132	0	130	850	279	160	1974	207	190	259	86	104	0	894	0	389	42	2025	1529	108	146	319	20	0	1431	464	1934
245_Mugilidae	Mugil cephalus	100	1	0	0	0	0	0	0	0	0	0	0	0	0	0	0	0	0	0	0	0	0	0	0	0	0	0	0	0	0	0	0	0	0	0	0	0	0	0	0	0	0	0	0	0	0	0	0
245_Mugilidae	Oedalechilus labiosus	4551	31	0	40	57	0	22	18	0	0	0	0	0	433	729	0	59	0	0	0	71	0	0	0	0	0	33	127	0	106	0	0	0	0	0	0	0	0	131	0	30	0	0	0	0	0	0	0
247_Notocheiridae	Iso flosmaris	90392	289	816	0	20	1325	0	0	0	258	0	48	18	11	0	0	0	39	83	0	0	0	26	0	0	0	0	21	0	0	0	143	0	0	0	0	0	0	93	0	119	0	336	0	0	0	0	10
251_Atherinidae	Atherinomorus lacunosus	68	1	0	0	0	0	0	0	0	0	0	0	0	0	0	0	0	0	0	0	0	0	0	0	0	0	0	0	0	0	0	0	0	0	0	0	0	0	0	0	0	0	0	0	0	0	0	0
251_Atherinidae	Atherinomorus pinguis	111	1	0	0	0	0	0	0	0	0	0	0	0	0	0	0	0	0	0	0	0	0	0	0	0	0	0	0	0	0	0	0	0	0	0	0	0	0	0	0	0	0	0	0	0	0	0	0
251_Atherinidae	Atherion elymus	432349	449	0	3611	4187	443	289	824	669	2795	475	1678	42	0	2232	2878	498	379	970	237	240	3954	2463	105	0	1313	210	172	77	3206	546	1153	2367	2873	322	0	1139	1034	244	109	1498	380	214	3389	266	116	105	494
251_Atherinidae	Atherion elymus gotu1	216	2	0	0	0	0	0	0	0	0	0	0	0	0	0	0	0	0	0	0	0	0	0	0	0	0	0	0	0	0	0	0	0	0	0	0	0	0	0	0	0	0	0	0	0	0	0	0
251_Atherinidae	Hypoatherina tsurugae	94360	150	0	365	17	0	0	0	247	183	61	90	0	0	325	0	0	0	0	0	0	990	664	0	0	26	0	0	0	0	136	10	1130	0	0	0	0	0	0	0	0	694	0	435	0	0	170	0
251_Atherinidae	Hypoatherina valenciennei	77376	97	0	0	0	0	0	0	0	0	0	0	14	0	0	0	0	0	0	0	0	0	405	99	0	0	0	0	0	0	0	177	88	70	326	0	0	0	0	0	0	0	0	0	2013	0	0	47
253_Exocoetidae	Cheilopogon doederleinii	11206	49	0	0	0	0	0	0	0	0	0	0	0	0	0	0	0	0	0	0	0	0	0	0	0	0	0	0	0	0	0	0	0	0	0	0	0	0	0	0	0	0	0	0	0	0	0	0
253_Exocoetidae	Cypselurus agoo agoo	874	8	0	0	0	24	0	0	0	131	0	0	0	0	0	11	0	0	0	0	0	0	0	0	0	0	0	0	0	0	0	0	0	0	0	0	0	0	0	0	0	0	0	0	0	0	0	0
253_Exocoetidae	Cypselurus angusticeps	70	1	0	0	0	0	0	0	0	0	0	0	0	0	0	0	0	0	0	0	0	0	0	0	0	0	0	0	0	0	0	0	0	0	0	0	0	0	0	0	0	0	0	0	0	0	0	0
253_Exocoetidae	Cypselurus atrisignis	99	1	0	0	0	0	0	0	0	0	0	0	0	0	0	0	0	0	0	0	0	0	0	0	0	0	0	0	0	0	0	0	0	0	0	0	0	0	0	0	0	0	0	0	0	0	0	0
253_Exocoetidae	Cypselurus exiliens	42	2	0	0	0	0	0	0	0	0	0	0	0	0	0	0	0	0	0	0	0	0	0	0	0	0	0	0	0	0	0	0	0	0	0	0	0	0	0	0	0	0	0	0	0	0	0	0
253_Exocoetidae	Cypselurus heterurus doederleini	17959	68	0	0	0	0	0	0	0	0	0	0	0	0	0	0	0	0	0	0	0	0	0	0	0	0	0	0	0	0	0	0	0	0	0	0	0	0	0	0	0	0	0	0	0	0	0	0
253_Exocoetidae	Cypselurus hiraii	92	1	0	0	0	0	0	0	0	0	0	0	0	0	0	0	0	0	0	0	0	0	0	0	0	0	0	0	0	0	0	0	0	0	0	0	0	0	0	0	0	0	0	0	0	0	0	0
253_Exocoetidae	Cypselurus naresii	1861	19	0	0	0	18	0	0	0	0	0	0	0	0	0	0	0	0	0	0	0	0	0	0	0	0	0	0	0	0	0	0	0	0	0	0	0	0	0	0	0	0	0	0	0	0	0	0
253_Exocoetidae	Exocoetus volitans	106	2	0	0	0	0	0	0	0	0	0	0	0	0	0	0	0	0	0	0	0	0	0	0	0	0	0	0	0	0	0	0	0	0	0	0	0	0	0	0	0	0	0	0	0	0	0	0
253_Exocoetidae	Parexocoetus brachypterus	104	2	0	0	0	0	0	0	0	0	0	0	0	0	0	0	0	0	0	0	0	0	0	0	0	0	0	0	0	0	0	0	0	0	0	0	0	0	0	0	0	0	0	0	0	0	0	0
253_Exocoetidae	Prognichthys sealei	20	1	0	0	0	0	0	0	0	0	0	0	0	0	0	0	0	0	0	0	0	0	0	0	0	0	0	0	0	0	0	0	0	0	0	0	0	0	0	0	0	0	0	0	0	0	0	0
254_Hemiramphidae	Euleptorhamphus viridis	13	1	0	0	0	0	0	0	0	0	0	0	0	0	0	0	0	0	0	0	0	0	0	0	0	0	0	0	0	0	0	0	0	0	0	0	0	0	0	0	0	0	0	0	0	0	0	0
254_Hemiramphidae	Hemiramphus lutkei	9	1	0	0	0	0	0	0	9	0	0	0	0	0	0	0	0	0	0	0	0	0	0	0	0	0	0	0	0	0	0	0	0	0	0	0	0	0	0	0	0	0	0	0	0	0	0	0
254_Hemiramphidae	Hyporhamphus intermedius	10368	5	0	0	0	0	0	0	0	0	0	0	0	0	0	0	0	0	0	0	0	0	0	0	0	0	0	0	0	0	0	0	0	0	0	0	0	0	0	0	0	0	0	0	0	0	0	0
254_Hemiramphidae	Hyporhamphus sajori	8817	54	0	0	0	0	0	23	0	0	0	0	10	0	0	0	0	0	0	0	0	98	0	0	0	0	0	0	0	0	0	0	0	0	0	0	0	0	0	0	0	0	0	0	0	0	0	0
254_Hemiramphidae	Hyporhamphus yuri	48	1	0	0	0	0	0	0	0	0	0	0	0	0	0	0	0	0	0	0	0	0	0	0	0	0	0	0	0	0	0	0	0	0	0	0	0	0	0	0	0	0	0	0	0	0	0	0
254_Hemiramphidae	Zenarchopterus dunckeri	23	1	0	0	0	0	0	0	0	0	0	0	0	0	0	0	0	0	0	0	0	0	0	0	0	0	0	0	0	0	0	0	0	0	0	0	0	0	0	0	0	0	0	0	0	0	0	0
255_Belonidae	Ablennes hians	499	6	0	0	0	0	0	0	0	0	0	0	0	0	0	0	0	0	0	0	0	0	0	0	0	0	0	0	0	0	0	0	0	0	0	0	0	0	0	0	0	0	0	0	0	0	0	0
255_Belonidae	Ablennes hians	10	1	0	0	0	0	0	0	0	0	0	0	0	0	0	0	0	0	0	0	0	0	0	0	0	0	0	0	0	0	0	0	0	0	0	0	0	0	0	0	0	0	0	0	0	0	0	0
255_Belonidae	Strongylura anastomella	1153	20	0	0	0	0	0	0	0	0	0	0	0	0	0	0	0	0	0	0	0	0	0	0	0	0	0	0	0	0	0	0	0	0	20	0	0	0	0	0	0	0	0	0	0	0	0	0
255_Belonidae	Tylosurus acus melanotus	145	3	0	0	0	0	0	0	0	0	0	0	0	0	0	0	0	0	0	0	0	0	0	0	0	0	0	0	0	0	0	0	0	0	0	0	0	0	0	0	85	0	0	0	0	0	0	0
255_Belonidae	Tylosurus crocodilus crocodilus	7126	42	0	0	233	102	0	346	109	41	0	0	35	0	546	280	290	0	49	116	0	0	0	0	0	13	34	0	0	0	470	487	0	0	0	0	0	68	1430	0	59	86	0	0	0	0	0	0
256_Scomberesocidae	Cololabis saira	4139	23	0	0	0	0	0	0	0	0	0	0	0	0	0	0	0	0	0	0	0	0	115	0	0	0	0	39	0	0	0	0	0	0	0	0	0	0	0	0	0	0	0	0	107	0	0	0
279_Monocentridae	Monocentris japonicus	20	1	0	0	0	0	0	0	0	0	0	0	0	0	0	0	0	0	0	0	0	0	0	0	0	0	0	0	0	0	0	0	0	0	0	0	0	0	0	0	0	0	0	0	0	0	0	0
280_Trachichthyidae	Aulotrachichthys prosthemius	54	1	0	0	0	0	0	0	0	0	0	0	0	0	0	0	0	0	0	0	0	0	0	0	0	0	0	0	0	0	0	0	0	0	0	0	0	0	0	0	0	0	0	0	0	0	0	0
282_Holocentridae	Myripristis berndti	12	1	0	0	0	0	0	0	0	0	0	0	0	0	0	0	0	0	0	0	0	0	0	0	0	0	0	0	0	0	0	0	0	0	0	0	0	0	0	0	0	0	0	0	0	0	0	0
282_Holocentridae	Ostichthys kaianus	501	3	0	0	0	0	0	0	0	0	0	0	0	0	0	0	0	0	0	0	0	0	0	0	0	0	0	0	0	0	0	0	0	0	0	0	0	0	0	0	0	0	0	0	0	0	0	0
282_Holocentridae	Sargocentron praslin	46	1	0	0	0	0	0	0	0	0	0	0	0	0	0	0	0	0	0	0	0	0	0	0	0	0	0	0	0	0	0	0	0	0	0	0	0	0	0	0	0	0	0	0	0	0	0	0
282_Holocentridae	Sargocentron punctatissimum	35	1	0	0	0	0	0	0	0	0	0	0	0	0	0	0	0	0	0	0	0	0	0	0	0	0	0	0	0	0	0	0	0	0	0	0	0	0	0	0	0	0	0	0	0	0	0	0
282_Holocentridae	Sargocentron rubrum	20	1	0	0	0	0	0	0	0	0	0	0	0	0	0	0	0	0	0	0	0	0	0	0	0	0	0	0	0	0	0	0	0	0	0	0	0	0	0	0	0	0	0	0	0	0	0	0
282_Holocentridae	Sargocentron spiniferum	15	1	0	0	0	0	0	0	0	0	0	0	0	0	0	0	0	0	0	0	0	0	0	0	0	0	0	0	0	0	0	0	0	0	0	0	0	0	0	0	0	0	0	0	0	0	0	0
282_Holocentridae	Sargocentron tiere	122	1	0	0	0	0	0	0	0	0	0	0	0	0	0	0	0	0	0	0	0	0	0	0	0	0	0	0	0	0	0	0	0	0	0	0	0	0	0	0	0	0	0	0	0	0	0	0
290_Aulorhynchidae	Aulichthys japonicus	11	1	0	0	0	0	0	0	0	0	0	0	0	0	0	0	0	0	0	0	0	0	0	0	0	0	0	0	0	0	0	0	0	0	0	0	0	0	0	0	0	0	0	0	0	0	0	0
295_Syngnathidae	Corythoichthys haematopterus	15	1	0	0	0	0	0	0	0	0	0	0	0	0	0	0	0	0	0	0	0	0	0	0	0	0	0	0	0	0	0	0	0	0	0	0	0	0	0	0	0	0	0	0	0	0	0	0
295_Syngnathidae	Cosmocampus banneri gotu1	56	2	0	0	0	0	0	0	0	0	0	0	0	0	0	0	0	0	0	0	0	0	0	0	0	0	0	0	0	0	0	0	0	0	0	0	0	0	0	0	0	0	0	0	0	0	0	0
295_Syngnathidae	Hippocampus coronatus	2637	18	0	0	0	0	0	0	0	0	0	0	0	0	0	0	0	0	0	0	0	0	0	0	0	0	0	0	0	0	0	0	0	0	0	0	0	0	0	0	0	49	0	0	0	0	0	0
295_Syngnathidae	Hippocampus mohnikei	15	1	0	0	0	0	0	0	0	0	0	0	0	0	0	0	0	0	0	0	0	0	0	0	0	0	0	0	0	0	0	0	0	0	0	0	0	0	0	0	0	0	0	0	0	0	0	0
295_Syngnathidae	Hippocampus mohnikei	19	1	0	0	0	0	0	0	0	0	0	0	0	0	0	0	0	0	0	0	0	0	0	0	0	0	0	0	0	0	0	0	0	0	0	0	0	0	0	0	0	0	0	0	0	0	0	0
295_Syngnathidae	Hippocampus sindonis	74	1	0	0	0	0	0	0	0	0	0	0	0	0	0	0	0	0	0	0	0	0	0	0	0	0	0	0	0	0	0	0	0	0	0	0	0	0	0	0	0	0	0	0	0	0	0	0
295_Syngnathidae	Hippocampus sp	91	1	0	0	0	0	0	0	0	0	0	0	0	0	0	0	0	0	0	0	0	0	0	0	0	0	0	0	0	0	0	0	0	0	0	0	0	0	0	0	0	0	0	0	0	0	0	0
295_Syngnathidae	Hippocampus trimaculatus	68	1	0	0	0	0	0	0	0	0	0	0	0	0	0	0	0	0	0	0	0	0	0	0	0	0	0	0	0	0	0	0	0	0	0	0	0	0	0	0	0	0	0	0	0	0	0	0
295_Syngnathidae	Syngnathus schlegeli	1028	15	0	0	0	0	0	0	0	0	0	0	0	0	0	0	0	0	0	0	0	0	0	0	0	0	0	0	0	0	0	0	0	0	0	0	0	0	0	0	0	0	0	0	0	0	0	0
295_Syngnathidae	Urocampus nanus	33	2	0	0	0	0	0	0	0	0	0	0	16	0	0	0	0	0	0	0	0	0	0	0	0	0	0	0	0	0	0	0	0	0	0	0	0	0	0	0	0	0	0	0	0	0	0	0
297_Fistulariidae	Fistularia commersonii	195	2	0	0	0	0	0	0	0	0	0	0	0	0	0	0	0	0	0	0	0	0	0	0	0	0	0	0	0	0	0	0	0	0	0	0	0	0	0	0	0	0	0	0	0	0	0	0
297_Fistulariidae	Fistularia petimba	85	3	0	0	0	0	0	0	0	0	13	0	0	0	0	0	0	0	0	0	0	0	0	0	0	0	0	0	0	0	0	0	0	0	0	0	0	0	0	0	0	0	0	0	0	0	0	0
298_Macroramphosidae	Macroramphosus scolopax	298	5	0	0	0	0	0	0	0	0	0	0	0	0	0	0	0	0	0	0	0	0	0	0	0	0	0	0	0	0	0	0	0	0	0	0	0	0	0	0	0	0	0	0	0	0	0	0
304_Scorpaenidae	Ablabys taenianotus	48	1	0	0	0	0	0	0	0	0	0	0	0	0	0	0	0	0	0	0	0	0	0	0	0	0	0	0	0	0	0	0	0	0	0	0	0	0	0	0	0	0	0	0	0	0	0	0
304_Scorpaenidae	Apistus carinatus	416	10	0	0	0	0	0	0	0	0	0	0	18	0	0	0	0	0	0	0	0	0	0	0	0	0	0	0	0	0	0	0	0	0	0	0	0	0	0	0	0	0	0	0	0	0	0	0
304_Scorpaenidae	Erosa erosa	12	1	0	0	0	0	0	0	0	0	0	0	0	0	0	0	0	0	0	0	0	0	0	0	0	0	0	0	0	0	0	0	0	0	0	0	0	0	0	0	0	0	0	0	0	0	0	0
304_Scorpaenidae	Inimicus japonicus	274	4	0	0	0	0	0	0	0	0	0	0	0	0	0	0	0	0	0	0	0	0	0	0	0	0	0	0	0	0	0	0	0	0	0	0	0	0	0	0	0	0	0	0	0	0	0	0
304_Scorpaenidae	Minous pusillus	12	1	0	0	0	0	0	0	0	0	0	0	0	0	0	0	0	0	0	0	0	0	0	0	0	0	0	0	0	0	0	0	0	0	0	0	0	0	0	0	0	0	0	0	0	0	0	0
304_Scorpaenidae	Paracentropogon rubripinnis	14753	116	0	0	0	0	35	0	56	0	0	93	0	0	0	0	0	0	0	60	60	0	50	640	0	0	0	13	0	0	46	0	0	0	391	0	0	0	0	0	0	78	0	0	0	212	0	0
304_Scorpaenidae	Parascorpaena mossambica	785	10	0	0	0	0	0	0	0	0	0	0	0	0	0	0	0	0	0	0	0	0	0	0	0	0	0	0	0	0	0	0	0	0	0	0	0	0	0	0	0	0	0	0	0	0	0	0
304_Scorpaenidae	Pterois spp.	272	5	0	0	0	0	0	0	0	17	0	0	0	0	0	0	0	0	0	0	0	0	0	0	0	0	0	0	0	0	0	0	0	0	0	0	0	0	0	0	0	0	0	0	0	0	0	0
304_Scorpaenidae	Scorpaena miostoma	1028	14	0	0	0	0	0	0	0	0	0	0	0	0	0	0	0	0	0	0	0	264	0	0	168	0	0	0	0	0	0	0	0	0	0	0	0	0	0	0	0	0	0	0	0	0	0	0
304_Scorpaenidae	Scorpaena miostoma gotu1	245	7	0	0	0	0	0	0	0	0	0	0	0	0	0	0	0	0	0	0	0	0	0	0	0	0	0	0	0	0	0	0	0	0	0	0	0	0	0	0	0	0	0	0	0	0	0	0
304_Scorpaenidae	Scorpaena miostoma gotu2	33	1	0	0	0	0	0	0	0	0	0	0	0	0	0	0	0	0	0	0	0	0	0	0	0	0	0	0	0	0	0	0	0	0	0	0	0	0	0	0	0	0	0	0	0	0	0	0
304_Scorpaenidae	Scorpaena miostoma gotu3	32	1	0	0	0	0	0	0	0	0	0	0	0	0	0	0	0	0	0	0	0	0	0	0	0	0	0	0	0	0	0	0	0	0	0	0	0	0	0	0	0	0	0	0	0	0	0	0
304_Scorpaenidae	Scorpaena pepo	17	1	0	0	0	0	0	0	0	0	0	0	0	0	0	0	0	0	0	0	0	0	0	0	0	0	0	0	0	0	0	0	0	0	0	0	0	0	0	0	0	0	0	0	0	0	0	0
304_Scorpaenidae	Scorpaenodes evides	10434	103	0	0	0	0	0	0	0	15	0	0	0	0	0	16	0	0	0	0	15	11	0	0	0	0	0	0	17	0	0	0	21	0	0	0	0	0	0	76	0	0	0	0	0	0	59	0
304_Scorpaenidae	Scorpaenopsis cirrosa	730	12	0	0	0	0	0	0	0	0	0	0	0	0	0	0	0	0	26	0	0	0	0	0	0	0	0	0	0	0	0	0	0	0	0	0	0	0	0	0	0	0	0	0	0	0	0	0
304_Scorpaenidae	Scorpaenopsis cirrosa	29	1	0	0	0	0	0	0	0	0	0	0	0	0	0	0	0	0	0	0	0	0	0	0	0	0	0	0	0	0	0	0	0	0	0	0	0	0	0	0	0	0	0	0	0	0	0	0
304_Scorpaenidae	Scorpaenopsis neglecta	167	4	0	0	0	0	0	0	0	90	0	0	0	0	0	0	14	0	0	0	0	0	0	0	0	0	0	0	0	0	0	0	0	0	0	0	0	0	0	0	0	0	0	0	0	0	0	0
304_Scorpaenidae	Sebastes spp.	112058	437	98	247	0	105	22	0	70	58	16	25	21	218	54	29	15	231	45	91	54	99	335	20	187	66	0	66	69	0	16	0	0	62	0	1067	0	65	0	58	34	0	55	72	51	69	62	0
304_Scorpaenidae	Sebastiscus albofasciatus	102	1	0	0	0	0	0	0	0	0	0	0	0	0	0	0	0	0	0	0	0	0	0	0	0	0	0	0	0	0	0	0	0	0	0	0	0	0	0	0	0	0	0	0	0	0	0	0
304_Scorpaenidae	Sebastiscus marmoratus	33265	139	43	0	0	0	0	0	0	71	44	0	0	0	70	0	0	0	0	0	0	169	48	0	0	0	0	0	0	0	0	31	0	143	0	0	0	0	0	0	0	0	22	861	0	0	92	0
306_Aploactinidae	Cocotropus sp CBM ZF 17864 gotu1	844	3	0	0	0	0	0	0	0	0	0	0	0	0	0	0	0	0	0	0	0	0	0	0	0	0	0	0	0	0	0	0	0	106	0	0	0	0	0	0	0	0	0	0	0	0	0	0
310_Triglidae	Chelidonichthys spinosus	5163	25	0	0	0	0	0	0	0	0	0	0	0	0	0	0	0	0	0	0	0	0	0	0	0	0	0	0	0	0	0	0	0	0	0	0	0	0	0	0	0	0	0	0	0	0	0	0
313_Platycephalidae	Cymbacephalus beauforti	14	1	0	0	0	0	0	0	0	0	0	0	0	0	0	0	0	0	0	0	0	0	0	0	0	0	0	0	0	0	0	0	0	0	0	0	0	0	0	0	0	0	0	0	0	0	0	0
313_Platycephalidae	Onigocia spinosa	51	3	0	0	0	0	0	0	0	0	0	0	0	0	0	0	0	0	0	0	0	0	0	0	0	0	0	0	0	0	0	0	0	0	0	0	0	0	0	0	0	0	0	0	0	0	0	0
313_Platycephalidae	Platycephalus sp KAUM I 83735	757	3	0	0	0	0	0	0	0	0	0	0	0	0	0	0	0	0	0	0	0	0	0	0	0	0	0	0	0	0	0	0	0	0	0	0	0	0	0	0	0	0	0	0	0	0	0	0
313_Platycephalidae	Platycephalus sp.	3899	58	0	0	0	0	0	0	41	0	0	0	199	0	0	0	0	0	0	0	0	0	0	0	0	0	0	0	0	0	0	0	0	0	0	0	0	0	0	0	0	0	0	30	0	0	0	0
316_Hexagrammidae	Hexagrammos otakii・H. agrammus	101408	137	137	0	0	0	0	0	0	0	22	74	322	122	0	0	0	0	0	0	0	0	347	1510	0	0	0	0	0	0	0	0	0	463	929	0	0	0	0	0	0	0	188	0	91	1254	218	0
320_Cottidae	Furcina osimae typeA	17	1	0	0	0	0	0	0	0	0	0	0	0	0	0	0	0	0	0	0	0	0	0	0	0	0	0	0	0	0	0	0	0	0	0	0	0	0	0	0	0	0	0	0	0	0	0	0
320_Cottidae	Furcina osimae typeB	11332	111	33	0	0	0	12	0	0	0	0	0	0	31	0	0	0	0	0	0	18	36	0	37	151	0	0	25	0	0	0	0	13	0	40	67	20	31	0	0	0	0	47	21	0	29	0	0
320_Cottidae	Myoxocephalus polyacanthocephalus	28	1	0	0	0	0	0	0	0	0	0	0	0	0	0	0	0	0	0	0	0	0	0	0	0	0	0	0	0	0	0	0	0	0	0	0	0	0	0	0	0	0	0	0	0	0	0	0
320_Cottidae	Ocynectes maschalis	401	7	0	0	0	0	0	0	0	0	0	0	0	0	0	0	0	0	0	0	0	0	0	0	0	0	0	0	0	0	0	0	0	0	0	0	0	0	0	0	0	0	0	0	0	0	0	0
320_Cottidae	Ocynectes modestus	248	7	50	0	0	0	0	0	0	0	0	0	0	14	0	0	0	0	0	0	0	0	0	0	0	0	0	0	24	0	0	0	0	0	0	0	0	0	16	0	0	0	0	0	0	0	0	0
320_Cottidae	Pseudoblennius cottoides Genetype1	757	11	0	0	0	0	0	0	0	0	0	0	0	0	0	0	0	0	0	0	0	0	0	0	0	0	0	0	0	0	0	0	0	0	0	0	0	0	0	0	0	0	0	0	0	0	0	0
320_Cottidae	Pseudoblennius cottoides Genetype2	317	6	0	0	0	0	0	0	0	0	0	0	0	0	0	0	0	0	0	0	0	0	0	33	0	0	0	0	0	0	0	0	0	0	0	0	0	0	0	0	0	0	0	0	0	35	0	0
320_Cottidae	Pseudoblennius marmoratus	154150	400	80	39	395	188	58	602	2328	590	45	50	0	20	908	548	638	215	89	865	522	0	0	16	146	428	62	782	455	299	1100	952	269	46	41	0	0	75	80	505	116	2129	2975	333	2381	15	0	48
320_Cottidae	Pseudoblennius percoides	52833	206	243	0	0	0	0	0	61	55	0	53	79	82	430	0	114	0	0	0	291	0	262	67	0	116	0	27	0	83	0	0	0	265	32	2099	260	0	0	0	0	141	405	0	0	209	0	7748
320_Cottidae	Pseudoblennius zonostigma	2224	14	0	0	0	0	0	0	0	0	0	0	0	0	0	0	0	0	0	0	0	0	0	0	0	0	0	0	0	0	0	0	0	0	0	0	0	0	0	0	0	0	157	0	0	0	0	0
320_Cottidae	Vellitor minutus	27	2	0	0	0	0	0	0	0	0	0	0	0	0	10	0	0	0	0	0	0	0	0	0	0	0	0	0	0	0	0	0	0	0	0	0	0	0	0	0	0	0	0	0	0	0	0	0
320_Cottidae	Vellitor minutus gotu1	2663	40	0	0	0	0	0	0	0	19	0	0	0	0	0	0	0	0	0	0	65	130	0	162	0	0	0	0	0	0	0	0	30	0	37	0	0	0	0	0	0	0	22	0	0	28	0	0
327_Cyclopteridae	Lethotremus awae	902	8	0	0	0	0	0	0	0	0	0	0	0	0	0	0	0	0	0	0	0	0	0	0	0	0	0	0	0	0	0	0	0	0	0	0	0	0	0	0	0	0	0	0	0	0	0	0
328_Liparidae	Liparis punctulatus	45338	145	0	0	0	0	0	0	0	0	0	0	0	0	0	0	0	0	0	0	0	0	0	0	198	0	15	0	0	0	0	0	0	0	0	0	0	0	0	0	0	0	108	0	0	0	0	0
328_Liparidae	Liparis punctulatus	160	1	0	0	0	0	0	0	0	0	0	0	0	0	0	0	0	0	0	0	0	0	0	0	0	0	0	0	0	0	0	0	0	0	0	0	0	0	0	0	0	0	0	0	0	0	0	0
332_Moronidae	Lateolabrax japonicus	169249	260	258	10	15	0	0	0	0	177	0	14	293	56	682	53	0	0	0	0	63	308	14	100	283	125	0	0	40	0	0	0	392	0	111	0	686	114	0	0	0	0	465	215	0	44	528	55
332_Moronidae	Lateolabrax latus	55880	228	0	0	0	16	33	0	0	65	0	0	34	110	0	0	44	0	0	0	0	428	428	0	0	24	16	0	72	0	0	221	0	0	0	0	2336	0	0	0	0	0	0	0	0	21	0	52
338_Serranidae	Caprodon schlegelii	1393	12	0	0	0	0	0	0	0	0	0	0	0	0	0	0	0	0	0	0	0	0	0	0	0	0	0	0	0	0	0	0	0	0	0	0	0	0	0	0	0	0	0	0	0	0	0	0
338_Serranidae	Cephalopholis argus	10	1	0	0	0	0	0	0	0	0	0	0	0	0	0	0	0	0	0	0	0	0	0	0	0	0	0	0	0	0	0	0	0	0	0	0	0	0	0	0	0	0	0	0	0	0	0	0
338_Serranidae	Chelidoperca hirundinacea	805	2	0	0	0	0	0	0	0	0	0	0	0	0	0	0	0	0	0	0	0	0	0	0	0	0	0	0	0	0	0	0	0	0	0	0	0	0	0	0	0	0	0	0	0	0	0	0
338_Serranidae	Cromileptes altivelis	87	2	0	0	0	0	0	0	0	0	0	0	0	0	0	0	0	0	0	0	0	0	0	0	0	0	0	0	0	0	0	0	0	0	0	0	0	0	0	0	0	0	0	0	0	0	0	0
338_Serranidae	Epinephelu sp CBM DNA 19 231	45	1	0	0	0	0	0	0	0	0	0	0	0	0	0	0	0	0	0	0	0	0	0	0	0	0	0	0	0	0	0	0	0	0	0	0	0	0	0	0	0	0	0	0	0	0	0	0
338_Serranidae	Epinephelus akaara	24	1	0	0	0	0	0	0	0	0	0	0	0	0	0	0	0	0	0	0	0	0	0	0	0	0	0	0	0	0	0	0	0	0	0	0	0	0	0	0	0	0	0	0	0	0	0	0
338_Serranidae	Epinephelus areolatus	222	8	0	0	0	0	0	0	0	0	0	0	0	0	0	0	0	0	0	0	0	0	0	0	0	0	0	0	0	0	0	0	0	0	0	0	0	0	0	0	0	0	0	0	0	0	0	0
338_Serranidae	Epinephelus fasciatus	520	13	0	0	0	0	0	0	0	0	0	0	0	0	0	0	0	0	0	0	0	0	0	0	0	0	0	0	0	0	0	0	0	0	0	0	0	0	0	0	0	0	0	0	0	0	0	0
338_Serranidae	Epinephelus melanostigma	20	1	0	0	0	0	0	0	0	0	0	0	0	0	0	0	0	0	0	0	0	0	0	0	0	0	0	0	0	0	0	0	0	0	0	0	0	0	0	0	0	0	0	0	0	0	0	0
338_Serranidae	Epinephelus merra	104	1	0	0	0	0	0	0	0	0	0	0	0	0	0	0	0	0	0	0	0	0	0	0	0	0	0	0	0	0	0	0	0	0	0	0	0	0	0	0	0	0	0	0	0	0	0	0
338_Serranidae	Epinephelus miliaris	62	1	0	0	0	0	0	0	0	0	0	0	0	0	0	0	0	0	0	0	0	0	0	0	0	0	0	0	0	0	0	0	0	0	0	0	0	0	0	0	0	0	0	0	0	0	0	0
338_Serranidae	Epinephelus moara	1958	41	0	0	0	0	0	25	0	0	0	0	0	0	0	0	55	0	13	0	0	0	0	0	0	0	0	14	0	0	0	0	0	0	0	0	0	0	52	0	0	0	0	0	0	0	0	0
338_Serranidae	Epinephelus rivulatus	98	2	0	0	0	0	0	0	0	0	0	0	0	0	0	15	0	0	0	0	0	0	0	0	0	0	0	83	0	0	0	0	0	0	0	0	0	0	0	0	0	0	0	0	0	0	0	0
338_Serranidae	Epinephelus septemfasciatus	289	1	0	0	0	0	0	0	0	0	0	0	0	0	0	0	0	0	0	0	0	0	0	0	0	0	0	0	0	0	0	0	0	0	0	0	0	0	0	0	0	0	0	0	0	0	0	0
338_Serranidae	Grammistes sexlineatus	78	1	0	0	0	0	0	0	0	0	0	0	0	0	0	0	0	0	0	0	0	0	0	0	0	0	0	0	0	0	0	0	0	0	0	0	0	0	0	0	0	0	0	0	0	0	0	0
338_Serranidae	Pseudanthias rubrolineatus	436	7	0	0	0	0	0	0	0	0	0	0	0	0	0	0	0	0	0	0	0	0	0	0	0	0	0	0	0	0	0	0	0	0	0	0	0	0	0	0	0	0	0	0	0	0	0	0
338_Serranidae	Pseudanthias rubrolineatus gotu1	72	2	0	0	0	0	0	0	0	0	0	0	0	0	0	0	0	0	0	0	0	0	0	0	0	0	0	0	0	0	0	0	0	0	0	0	0	0	0	0	0	0	0	0	0	0	0	0
338_Serranidae	Pseudanthias squamipinnis	1420	13	0	0	0	0	0	0	0	0	0	0	0	0	0	0	0	0	0	0	0	0	0	0	0	0	0	0	17	0	0	0	0	0	0	0	0	0	0	0	0	0	0	0	0	0	0	0
338_Serranidae	Sacura margaritacea	456	11	0	0	0	0	0	0	0	0	0	0	0	0	0	0	0	0	0	0	0	0	0	0	0	0	0	0	0	0	0	0	0	0	0	0	0	0	0	0	73	0	0	0	0	0	0	0
338_Serranidae	Serranidae sp JL-2015	130	3	0	0	0	0	0	0	0	0	0	0	0	0	0	0	0	0	0	0	0	0	0	0	0	0	0	0	0	0	0	0	0	0	0	0	0	0	0	0	0	0	0	0	0	0	0	0
338_Serranidae	Symphysanodon katayamai	13	1	0	0	0	0	0	0	0	0	0	0	0	0	0	0	0	0	0	0	0	0	0	0	0	0	0	0	0	0	0	0	0	0	0	0	0	0	0	0	0	0	0	0	0	0	0	0
341_Callanthiidae	Callanthias japonicus	16	2	0	0	0	0	0	0	0	0	0	0	0	0	0	0	0	0	0	0	0	0	0	0	0	0	0	0	0	0	0	0	0	0	0	0	0	0	0	0	0	0	0	0	0	0	0	0
342_Pseudochromidae	Pseudochromis tapeinosoma	287	5	0	0	0	0	29	0	0	0	0	0	0	0	0	0	0	0	0	0	0	91	0	0	0	0	0	0	0	0	0	0	0	0	0	0	0	0	0	0	0	0	0	0	0	0	0	0
344_Plesiopidae	Plesiops nakaharae	235	9	0	0	0	0	0	0	0	0	0	0	0	0	0	0	0	0	0	0	0	0	0	0	0	0	0	0	0	0	0	0	0	0	0	0	0	0	0	0	0	0	0	0	0	0	0	0
346_Opistognathidae	Opistognathus liturus	169	1	0	0	0	0	0	0	0	0	0	0	0	0	0	0	0	0	0	0	0	0	0	0	0	0	0	0	0	0	0	0	0	0	0	0	0	0	0	0	0	0	0	0	0	0	0	0
351_Priacanthidae	Priacanthus blochii	176	3	0	0	0	0	0	0	0	0	0	0	0	0	0	0	0	0	0	0	0	0	0	0	0	0	0	0	0	0	0	0	0	0	0	0	0	0	0	0	0	0	0	0	0	0	0	0
352_Apogonidae	Apogon coccineus	102	2	0	0	0	0	0	0	0	0	0	0	0	0	0	0	0	0	0	0	0	0	0	0	0	0	0	0	0	0	0	0	0	0	0	0	0	0	0	0	0	0	0	0	0	0	0	0
352_Apogonidae	Apogon seminigracaudus	13	1	0	0	0	0	0	0	0	13	0	0	0	0	0	0	0	0	0	0	0	0	0	0	0	0	0	0	0	0	0	0	0	0	0	0	0	0	0	0	0	0	0	0	0	0	0	0
352_Apogonidae	Apogon semiornatus	19	1	0	0	0	0	0	0	0	0	0	0	0	0	0	0	0	0	0	0	0	0	0	0	0	0	0	0	0	0	0	0	0	0	0	0	0	0	0	0	0	0	0	0	0	0	0	0
352_Apogonidae	Apogon sp RYUKYU-ISHIMOCHI gotu1	140	2	0	0	0	0	0	0	0	0	0	0	0	0	0	0	0	0	0	0	0	0	0	0	0	0	0	0	0	0	0	0	0	0	0	0	0	0	0	0	0	0	0	0	0	0	0	0
352_Apogonidae	Apogon unicolor	144	1	0	0	0	0	0	0	0	0	0	0	0	0	0	0	0	0	0	0	0	0	0	0	0	0	0	0	0	0	0	0	0	0	0	0	0	0	0	0	0	0	0	0	0	0	0	0
352_Apogonidae	Apogon unicolor gotu1	1044	19	0	0	0	24	0	0	0	0	12	0	0	0	0	0	0	0	0	0	0	0	0	0	0	0	0	0	0	0	0	0	0	0	0	0	0	0	0	0	0	0	0	0	0	0	0	0
352_Apogonidae	Apogonichthyoides niger	970	21	0	0	0	0	0	0	0	27	0	0	0	0	0	0	0	0	0	0	0	82	0	28	0	0	0	0	0	0	0	0	0	0	0	0	0	0	0	0	0	0	0	0	0	0	0	0
352_Apogonidae	Apogonichthys ocellatus	21	1	0	0	0	0	0	0	0	0	0	0	0	0	0	0	0	0	0	0	0	0	0	0	0	0	0	0	0	0	0	0	0	0	0	0	0	0	0	0	0	0	0	0	0	0	0	0
352_Apogonidae	Jaydia carinatus gotu1	328	7	0	0	0	0	0	0	0	0	0	0	0	0	0	0	0	0	0	0	0	0	0	0	0	0	0	0	0	0	0	0	0	0	0	0	0	0	0	0	0	0	0	0	0	0	0	0
352_Apogonidae	Jaydia carinatus gotu2	146	6	0	9	0	0	0	0	0	0	0	0	0	0	0	0	0	0	0	0	0	0	0	0	0	56	0	0	0	0	0	0	0	0	0	0	0	0	0	0	0	0	0	0	0	0	0	0
352_Apogonidae	Ostorhinchus cookii	173	1	0	0	0	0	0	0	0	0	0	0	0	0	0	0	0	0	0	0	0	0	0	0	0	0	0	0	0	0	0	0	0	0	0	0	0	0	0	0	0	0	0	0	0	0	0	0
352_Apogonidae	Ostorhinchus doederleini	4017	49	0	0	0	0	0	0	22	0	0	12	0	0	0	0	0	0	18	22	0	0	113	0	0	42	0	0	0	0	0	0	0	0	0	0	0	0	0	0	0	0	132	135	0	0	0	0
352_Apogonidae	Ostorhinchus endekataenia	867	14	0	0	0	0	0	0	0	0	0	0	0	0	0	0	0	0	0	0	0	0	0	0	0	0	0	0	0	0	0	0	0	0	0	0	0	0	0	0	0	0	0	0	0	0	0	0
352_Apogonidae	Ostorhinchus kiensis	31	1	0	0	0	0	0	0	0	0	0	0	0	0	0	0	0	0	0	0	0	0	0	0	0	0	0	0	0	0	0	0	0	0	0	0	0	0	0	0	0	0	0	0	0	0	0	0
352_Apogonidae	Ostorhinchus notatus	7303	43	0	0	0	0	0	0	0	0	0	14	0	0	0	0	0	0	0	184	0	217	14	0	0	0	0	0	0	0	0	0	1083	0	0	0	0	0	0	0	0	0	0	469	119	0	0	0
352_Apogonidae	Ostorhinchus properuptus	120	3	0	0	0	0	0	0	0	0	0	0	0	0	0	0	0	0	0	0	0	0	0	0	0	0	0	0	0	0	0	0	0	0	0	0	0	0	0	0	0	0	0	0	0	0	0	0
352_Apogonidae	Ostorhinchus semilineatus	5223	78	0	0	14	105	0	0	0	0	0	0	0	0	0	101	0	0	0	0	59	0	22	17	0	0	87	0	11	0	16	0	0	43	0	0	0	0	0	0	0	0	46	0	0	0	0	0
352_Apogonidae	Ostorhinchus sp NSMT P62210	223	4	0	0	0	0	0	0	0	0	0	0	0	0	0	0	0	0	0	0	0	0	0	0	0	0	0	0	0	0	0	0	0	0	0	0	0	0	0	0	0	0	0	0	0	0	0	0
352_Apogonidae	Ostorhinchus sp NSMT P62210 gotu1	250	5	0	0	0	0	0	0	0	0	0	0	0	0	0	0	0	0	0	0	0	0	0	0	0	0	0	0	0	0	0	0	0	0	0	0	0	0	0	0	0	0	0	0	0	0	0	0
352_Apogonidae	Pristiapogon exostigma	1251	10	0	0	0	0	0	0	0	0	0	0	0	0	0	0	0	0	0	0	0	0	0	0	0	0	0	0	0	0	0	0	0	0	0	0	0	0	0	0	0	0	0	0	0	0	0	0
352_Apogonidae	Pseudamiops gracilicauda	45	1	0	0	0	0	0	0	0	0	0	0	0	0	0	0	0	0	0	0	0	0	0	0	0	0	0	0	0	0	0	0	0	0	0	0	0	0	0	0	0	0	0	0	0	0	0	0
352_Apogonidae	Rhabdamia spilota	51	1	0	0	0	0	0	0	0	0	0	0	0	0	0	0	0	0	0	0	0	0	0	0	0	0	0	0	0	0	0	0	0	0	0	0	0	0	0	0	0	0	0	0	0	0	0	0
354_Sillaginidae	Sillago japonica	27658	120	0	0	0	0	0	0	61	72	0	0	329	0	0	0	0	0	0	0	0	176	16	357	0	0	0	0	113	0	0	0	0	0	31	0	0	0	0	0	0	0	0	0	77	141	203	0
355_Malacanthidae	Branchiostegus japonicus	22	1	0	0	0	0	0	0	0	0	0	0	0	0	0	0	0	0	0	0	0	0	0	0	0	0	0	0	0	0	0	0	0	0	0	0	0	0	0	0	0	0	0	0	0	0	0	0
358_Scombropidae	Scombrops boops	15281	63	0	0	0	24	0	0	0	0	0	0	0	0	0	0	0	0	0	264	0	0	0	0	0	35	0	0	0	0	0	0	0	77	0	0	0	0	0	0	91	0	0	0	0	0	0	0
358_Scombropidae	Scombrops sp SI-2017	26	1	0	0	0	0	0	0	0	0	0	0	0	0	0	0	0	0	0	0	0	0	0	0	0	0	0	0	0	0	0	0	0	0	0	0	0	0	0	0	0	0	0	0	0	0	0	0
363_Echeneidae	Remora osteochir	288	6	0	0	0	0	0	0	0	0	0	0	0	0	0	0	0	0	0	0	0	0	0	0	0	0	0	0	0	0	0	0	0	0	0	0	0	0	0	0	0	0	0	0	0	0	0	0
364_Carangidae	Carangoides orthogrammus	28	2	0	0	0	0	0	0	0	0	0	0	0	0	0	0	0	0	0	0	0	0	0	0	0	0	0	0	0	0	0	0	0	0	0	0	0	0	0	0	0	0	0	0	0	0	0	0
364_Carangidae	Caranx ignobilis	15	1	0	0	0	0	0	0	0	0	0	0	0	0	0	0	0	0	0	0	0	0	0	0	0	0	0	0	0	0	0	0	0	0	0	0	0	0	0	0	0	0	0	0	0	0	0	0
364_Carangidae	Decapterus macarellus	169	6	0	0	0	0	0	0	0	0	0	0	0	0	0	0	0	0	0	0	0	0	0	0	0	0	0	0	0	0	0	0	0	0	0	0	0	0	0	0	0	0	0	0	0	0	0	0
364_Carangidae	Decapterus macrosoma	48	2	0	0	0	0	0	0	0	0	0	0	0	0	0	0	0	0	0	0	0	0	0	0	0	0	0	0	0	0	0	0	0	0	0	0	0	0	0	0	0	0	0	0	0	0	0	0
364_Carangidae	Decapterus maruadsi	5123	44	0	0	0	0	0	0	0	0	0	0	12	0	0	0	0	0	0	0	0	0	0	0	0	0	0	0	0	0	0	0	0	0	0	0	0	0	0	0	0	0	0	0	0	0	0	0
364_Carangidae	Decapterus muroadsi	50	1	0	0	0	0	0	0	0	0	0	0	0	0	0	0	0	0	0	0	0	0	0	0	0	0	0	0	0	0	0	0	0	0	0	0	0	0	0	0	0	0	0	0	0	0	0	0
364_Carangidae	Pseudocaranx dentex	2688	25	59	0	0	0	0	0	0	0	0	0	0	0	0	0	0	0	0	0	0	0	0	0	0	0	0	0	0	0	0	0	0	0	0	0	0	0	0	0	0	0	0	0	0	0	0	0
364_Carangidae	Selar crumenophthalmus	350	5	0	0	0	0	0	0	0	0	0	0	0	0	0	0	0	0	0	0	0	0	0	0	0	0	0	0	0	0	0	0	0	0	0	0	0	0	0	0	0	0	0	0	0	0	0	0
364_Carangidae	Seriola dumerili	7033	31	0	0	0	0	0	436	0	0	0	0	0	0	0	0	0	0	4371	18	0	0	0	0	0	0	0	0	0	0	0	0	0	0	0	0	0	0	0	0	48	0	0	0	0	0	156	0
364_Carangidae	Seriola lalandi	3111	32	0	0	0	0	0	72	0	0	0	0	0	0	0	0	0	0	0	0	0	0	0	0	0	0	0	0	0	0	0	0	0	0	0	0	0	0	0	0	0	0	0	0	0	0	0	0
364_Carangidae	Seriola quinqueradiata	12028	61	518	0	0	0	0	0	0	0	0	0	0	0	0	0	0	0	29	15	18	0	0	0	0	0	0	0	0	0	15	0	21	42	0	0	0	0	0	0	0	0	0	0	0	0	0	0
364_Carangidae	Seriola quinqueradiata	13	1	0	0	0	0	0	0	0	0	0	0	0	0	0	0	0	0	0	0	0	0	0	0	0	0	0	0	0	0	0	0	0	0	0	0	0	0	0	0	0	0	0	0	0	0	0	0
364_Carangidae	Seriola rivoliana	618	2	0	0	0	0	0	0	0	0	0	0	0	0	0	0	0	0	0	0	0	0	0	0	0	0	0	0	0	0	0	0	0	0	0	0	0	0	0	0	0	0	0	0	0	0	0	0
364_Carangidae	Trachinotus baillonii	1357	17	64	17	0	0	0	0	0	0	14	0	0	0	0	0	0	0	0	0	142	0	0	0	0	0	0	0	0	0	29	0	0	0	0	0	0	0	0	0	0	0	0	0	0	0	0	0
364_Carangidae	Trachinotus blochii	42	2	0	0	0	0	0	0	0	0	0	0	17	0	0	0	0	0	0	0	0	25	0	0	0	0	0	0	0	0	0	0	0	0	0	0	0	0	0	0	0	0	0	0	0	0	0	0
364_Carangidae	Trachurus japonicus	75049	208	987	0	44	0	0	0	0	0	0	316	0	0	42	19	0	0	20	22	0	0	4225	0	0	125	0	0	22	0	0	0	0	69	0	415	0	0	0	0	9	0	0	0	8894	0	276	0
366_Leiognathidae	Equulites elongatus	47	1	0	0	0	0	0	0	0	0	0	0	0	0	0	0	0	0	0	0	0	47	0	0	0	0	0	0	0	0	0	0	0	0	0	0	0	0	0	0	0	0	0	0	0	0	0	0
366_Leiognathidae	Equulites rivulatus	4700	37	0	0	0	0	0	0	0	0	0	0	216	0	0	0	0	0	0	0	0	0	0	650	0	0	0	0	0	0	0	0	0	0	0	0	0	0	0	0	0	0	0	0	0	0	0	0
366_Leiognathidae	Nuchequula nuchalis	4069	32	0	0	0	0	0	0	0	0	0	0	55	0	0	0	0	0	0	0	0	0	0	0	0	0	0	0	0	0	0	0	0	0	0	0	0	0	0	0	0	0	0	372	35	0	0	0
370_Lutjanidae	Lutjanus bengalensis	570	1	0	0	0	0	0	0	0	0	0	0	0	0	0	0	0	0	0	0	0	0	0	0	0	0	0	0	0	0	0	0	0	0	0	0	0	0	0	0	0	0	0	0	0	0	0	0
370_Lutjanidae	Lutjanus fulviflamma	480	2	0	0	0	0	0	0	0	0	0	0	0	0	0	0	0	0	0	0	0	0	0	0	0	0	0	0	0	0	0	0	0	0	0	0	0	0	0	0	0	0	0	0	0	0	0	0
370_Lutjanidae	Lutjanus monostigma	212	4	0	0	0	0	0	0	0	0	0	0	0	0	0	0	0	0	0	0	0	0	0	0	0	19	0	0	0	0	0	0	0	0	0	0	0	0	0	0	0	0	0	0	0	0	0	0
370_Lutjanidae	Lutjanus quinquelineatus	96	2	0	0	0	0	0	0	0	0	0	0	0	0	0	0	0	0	0	0	0	0	0	0	0	0	0	0	0	0	0	0	0	0	0	0	0	0	0	0	0	0	0	0	0	0	0	0
370_Lutjanidae	Lutjanus rivulatus	122	3	0	0	0	0	0	0	0	0	0	0	0	0	0	0	0	0	0	0	0	0	0	0	0	0	0	0	14	0	0	0	0	0	0	0	0	0	0	0	0	0	0	0	0	0	0	0
371_Caesionidae	Pterocaesio marri	30	1	0	0	0	0	0	0	0	0	0	0	0	0	0	0	0	0	0	0	0	0	0	0	0	0	0	0	0	0	0	0	0	0	0	0	0	0	0	0	0	0	0	0	0	0	0	0
373_Gerreidae	Gerres oyena	193	7	0	26	0	0	0	0	0	0	0	0	0	0	0	0	0	0	0	0	0	23	0	0	0	0	0	0	0	0	0	0	0	0	0	0	0	0	0	0	0	0	0	0	0	0	0	0
373_Gerreidae	Gerres sp CBM ZF 19209	105	2	0	0	0	0	0	0	0	0	0	0	0	0	0	0	0	0	0	0	0	0	0	0	0	0	0	0	0	0	0	0	0	0	0	0	0	0	0	0	0	0	0	0	0	0	0	0
374_Haemulidae	Diagramma picta	415	11	0	0	0	0	0	0	0	0	0	0	0	0	0	0	0	0	16	0	155	0	0	0	0	0	0	0	0	0	0	0	0	0	0	0	0	0	0	0	0	0	0	0	0	0	0	0
374_Haemulidae	Hapalogenys kishinouyei	116	1	0	0	0	0	0	0	0	0	0	0	0	0	0	0	0	0	0	0	0	0	0	0	0	0	0	0	0	0	0	0	0	0	0	0	0	0	0	0	0	0	0	0	0	0	0	0
374_Haemulidae	Hapalogenys sennin	114	4	0	0	0	0	0	0	0	0	0	0	0	0	0	0	0	0	0	0	0	0	0	0	0	0	0	0	0	0	0	0	0	0	0	0	0	0	0	0	0	0	0	0	0	0	0	0
374_Haemulidae	Parapristipoma trilineatum	18537	106	0	0	0	0	0	43	0	22	0	0	24	0	0	0	0	0	270	327	0	0	0	0	0	0	0	0	82	70	22	0	0	0	0	0	0	0	0	0	0	0	0	0	0	0	0	0
374_Haemulidae	Plectorhinchus cinctus	16041	134	63	9	0	0	0	0	28	169	0	0	202	0	0	0	0	17	20	13	0	0	0	0	0	0	0	0	0	0	14	0	0	59	0	0	0	0	0	74	0	0	127	220	0	0	0	0
374_Haemulidae	Pomadasys maculatum	27	2	0	0	0	0	0	0	0	0	0	0	0	0	0	0	0	0	0	0	0	0	0	0	0	0	0	0	0	0	0	0	0	0	0	0	0	0	0	0	0	0	0	0	0	0	0	0
374_Haemulidae	Pomadasys sp CBM ZF 18112	5164	5	0	0	0	0	0	0	0	0	0	0	0	4844	36	51	0	0	0	0	0	0	0	0	0	0	0	0	0	0	0	0	0	0	0	0	0	0	0	0	0	0	0	0	0	0	172	0
377_Lethrinidae	Lethrinus genivittatus	597	8	0	0	0	0	0	0	14	0	0	0	0	0	0	0	0	0	48	0	0	137	0	0	0	0	0	0	0	0	0	0	0	0	0	0	0	0	0	0	0	0	225	0	0	0	0	0
377_Lethrinidae	Lethrinus nebulosus	310	4	0	0	0	0	0	0	0	0	0	0	0	0	0	0	0	0	193	0	0	0	0	0	0	0	0	0	0	0	0	0	0	0	0	0	0	0	0	0	0	0	0	0	0	0	0	0
377_Lethrinidae	Lethrinus olivaceus	28	1	0	0	0	0	0	0	0	0	0	0	0	0	0	0	0	0	0	0	0	0	0	0	0	0	0	0	0	0	0	0	0	0	0	0	0	0	0	0	0	0	0	0	0	0	0	0
378_Sparidae	Acanthopagrus latus	2661	20	0	0	0	0	0	0	0	0	0	0	0	0	0	0	0	0	0	0	0	0	10	0	0	0	0	0	0	0	0	0	0	0	716	0	0	0	0	0	0	0	0	0	0	0	0	0
378_Sparidae	Acanthopagrus schlegelii	621772	504	424	43	0	132	55	23	355	523	382	0	746	770	530	0	205	12	0	936	171	388	360	1525	1551	776	275	362	827	0	439	247	0	145	724	2671	0	75	0	0	0	523	224	120	438	1881	3395	608
378_Sparidae	Dentex hypselosomus	64	1	0	0	0	0	0	0	0	0	0	0	0	0	0	0	0	0	0	0	0	0	0	0	0	0	0	0	0	0	0	0	0	0	0	0	0	0	0	0	0	0	0	0	0	0	0	0
378_Sparidae	Evynnis tumifrons	3458	27	0	0	0	0	0	0	0	0	0	0	0	0	0	0	0	0	0	0	0	0	0	0	0	0	0	0	0	0	0	0	0	25	0	0	0	0	0	0	0	0	0	26	0	0	0	0
378_Sparidae	Pagrus major	17468	110	13	0	0	0	0	0	0	0	0	0	0	0	0	0	0	0	0	0	0	0	0	0	0	0	0	0	0	0	13	0	0	0	0	0	0	0	0	0	0	0	0	0	0	0	0	0
378_Sparidae	Rhabdosargus sarba	2241	28	0	0	0	0	0	0	0	0	0	0	0	0	0	0	0	0	0	42	0	0	0	0	0	0	0	0	0	0	0	0	0	0	0	0	0	0	0	0	0	0	0	0	0	0	0	0
380_Polynemidae	Polydactylus microstomus	17	1	0	0	0	0	0	0	0	0	0	0	0	0	0	0	0	0	0	0	0	0	0	0	0	0	0	0	0	0	0	0	0	0	0	0	0	0	0	0	0	0	0	0	0	0	0	0
380_Polynemidae	Polydactylus plebeius	9	1	0	0	0	0	0	0	0	0	0	0	0	0	0	0	0	0	0	0	0	0	0	0	0	0	0	0	0	0	0	0	0	0	0	0	0	0	0	0	0	0	0	0	0	0	0	0
380_Polynemidae	Polydactylus sexfilis	15	1	0	0	0	0	0	0	0	0	0	0	0	0	0	0	0	0	15	0	0	0	0	0	0	0	0	0	0	0	0	0	0	0	0	0	0	0	0	0	0	0	0	0	0	0	0	0
380_Polynemidae	Polynemus aquilonaris	56	1	0	0	0	0	0	0	0	0	0	0	0	0	0	0	0	0	0	0	0	0	0	0	0	0	0	0	0	0	0	0	0	0	0	0	0	0	0	0	0	0	0	0	0	0	0	0
381_Sciaenidae	Argyrosomus japonicus	15	1	0	0	0	0	0	0	0	0	0	0	0	0	0	0	0	0	0	0	0	0	0	0	0	0	0	0	0	0	0	0	0	0	0	0	0	0	0	0	0	0	0	0	0	0	0	0
381_Sciaenidae	Nibea mitsukurii	3271	32	21	0	0	0	0	0	0	0	0	0	51	18	0	0	0	0	0	0	0	0	0	0	272	0	0	0	0	0	0	0	0	0	0	0	0	0	0	0	0	0	0	0	0	0	0	0
381_Sciaenidae	Pennahia anea	72	1	0	0	0	0	0	0	0	0	0	0	0	0	0	0	0	0	0	0	0	0	0	0	0	0	0	0	0	0	0	0	0	0	0	0	0	0	0	0	0	0	0	0	0	0	0	0
381_Sciaenidae	Pennahia argentata	407	4	0	0	0	0	0	0	0	0	0	0	0	0	0	0	0	0	0	0	0	0	0	0	0	0	0	0	0	0	0	0	0	0	0	0	0	0	0	0	0	0	0	0	0	0	0	0
382_Mullidae	Mulloidichthys vanicolensis	73	1	0	0	0	0	0	0	0	0	0	0	0	0	0	0	0	0	0	0	0	0	0	0	0	0	0	0	0	0	0	0	0	0	0	0	0	0	0	0	0	0	0	0	0	0	0	0
382_Mullidae	Parupeneus ciliatus	12458	114	0	0	0	49	70	104	188	0	143	0	0	0	132	18	126	0	71	63	122	24	0	15	0	44	0	135	34	29	296	0	0	0	16	0	473	0	120	223	0	400	348	221	20	66	0	40
382_Mullidae	Parupeneus indicus	916	19	0	0	0	0	0	0	0	0	0	0	0	0	0	0	0	0	0	0	0	0	0	15	0	0	0	124	0	0	0	0	0	0	0	0	0	0	0	0	0	0	0	0	0	0	0	0
382_Mullidae	Parupeneus multifasciatus	178	5	0	0	0	0	0	0	0	0	0	0	0	0	0	0	0	0	0	0	0	0	0	0	0	0	0	0	0	0	0	0	0	55	0	0	0	0	0	0	0	0	0	0	0	0	0	0
382_Mullidae	Parupeneus spilurus	366	8	0	0	0	0	0	0	0	0	0	0	0	0	0	0	0	0	0	0	0	0	0	0	0	19	0	0	0	0	0	0	0	0	0	0	0	0	0	0	0	0	0	0	0	0	0	0
382_Mullidae	Upeneus japonicus	689	18	0	0	0	0	0	0	0	0	0	0	0	0	0	0	0	0	0	0	0	0	0	0	0	0	0	0	0	0	0	0	0	0	0	0	0	0	0	0	0	0	0	0	0	0	0	0
382_Mullidae	Upeneus tragula	705	16	0	0	0	0	0	0	0	9	0	0	0	0	0	0	0	0	0	0	0	0	0	0	0	0	0	0	0	0	0	0	0	0	0	0	0	0	0	0	0	0	0	0	0	0	0	0
383_Pempheridae	Parapriacanthus ransonneti	1090	13	0	0	0	0	0	0	0	0	0	0	0	0	0	0	0	0	0	0	0	0	0	0	0	0	0	0	0	0	16	0	0	0	0	0	0	0	0	0	0	0	0	0	0	0	0	0
383_Pempheridae	Pempheris adusta	453	5	0	0	0	0	0	0	0	0	0	0	0	0	0	0	0	0	0	0	0	0	0	0	0	0	0	0	0	0	0	0	0	0	0	0	0	0	0	0	0	0	0	0	0	0	0	0
383_Pempheridae	Pempheris japonica	5929	29	0	0	0	0	0	0	0	0	0	0	0	0	0	0	0	0	0	0	0	0	0	0	0	0	0	0	0	0	0	0	0	0	0	0	0	0	0	0	0	0	0	0	0	0	0	0
383_Pempheridae	Pempheris oualensis	18	1	0	0	0	0	0	0	0	0	0	0	0	0	0	0	0	0	0	0	0	0	0	0	0	0	0	0	0	0	0	0	0	0	0	0	0	0	0	0	0	0	0	0	0	0	0	0
383_Pempheridae	Pempheris schwenkii	47249	153	0	0	56	166	21	78	0	298	121	0	0	0	0	0	0	43	16	204	279	208	296	16	0	0	163	63	15	524	129	378	44	1046	0	0	143	237	0	186	157	130	13	0	239	0	0	0
391_Kyphosidae	Girella leonina	211932	363	890	57	364	68	185	490	23	686	0	19	31	331	0	1220	88	533	493	76	682	226	0	0	279	180	1632	104	390	834	27	268	0	0	0	0	0	420	139	448	0	0	219	0	0	0	392	85
391_Kyphosidae	Girella mezina	3485	35	0	0	0	0	77	0	0	0	0	0	0	0	0	0	11	33	0	0	0	0	0	0	0	0	25	0	0	0	0	0	0	0	0	0	0	0	0	0	0	0	0	0	0	0	0	0
391_Kyphosidae	Girella punctata	953938	532	703	1255	1302	311	625	156	656	2720	141	1630	1101	466	1666	561	953	597	1677	549	169	270	192	210	852	1161	3381	416	3636	637	436	495	1163	79	89	3198	734	4400	1822	1050	123	436	23	0	193	851	1106	969
391_Kyphosidae	Kyphosus bigibbus	42837	190	0	0	0	0	0	22	16	47	0	0	0	0	0	370	12	199	93	80	0	0	0	0	0	16	58	0	139	550	156	45	35	0	0	0	0	110	0	205	658	273	0	0	0	0	0	0
391_Kyphosidae	Kyphosus cinerascens	6004	56	0	0	0	106	0	0	0	0	0	0	0	0	0	0	0	71	60	0	0	0	0	0	0	0	51	0	0	0	0	0	0	0	0	0	0	0	0	118	148	0	0	0	0	0	0	0
391_Kyphosidae	Kyphosus vaigiensis	5877	46	0	0	0	0	24	0	14	0	0	0	0	0	0	64	0	0	0	210	0	0	0	0	0	0	0	0	0	0	86	0	0	0	0	0	0	0	0	0	0	75	0	0	0	0	0	0
391_Kyphosidae	Labracoglossa argenteiventris	10765	64	0	0	0	16	13	0	0	0	0	0	0	0	0	0	0	0	47	0	0	0	0	0	0	0	0	0	0	0	0	0	0	0	0	0	0	0	0	0	0	57	0	0	0	0	0	0
391_Kyphosidae	Microcanthus strigatus	17813	159	0	214	238	14	0	0	58	14	10	0	161	12	0	72	138	0	0	47	0	0	12	0	0	23	0	234	0	0	146	0	0	176	0	0	0	0	0	0	0	0	103	0	0	0	0	0
393_Chaetodontidae	Chaetodon adiergastos	716	16	0	0	39	0	31	0	0	0	0	0	0	0	0	0	0	0	0	0	0	0	0	0	0	15	0	50	0	0	0	16	0	0	0	0	0	0	148	91	0	0	0	0	0	0	0	0
393_Chaetodontidae	Chaetodon auriga	1536	22	0	0	0	0	0	0	0	0	15	0	0	0	0	0	60	0	0	0	0	0	0	0	0	0	56	121	0	0	0	0	0	0	0	0	0	0	0	81	0	0	0	0	0	0	0	0
393_Chaetodontidae	Chaetodon auripes	13360	116	0	23	154	92	297	511	63	0	173	0	0	0	54	636	347	0	294	0	122	0	23	0	0	127	22	185	99	0	217	24	0	0	0	0	27	248	258	237	581	0	0	171	0	0	12	0
393_Chaetodontidae	Chaetodon lunula	406	8	0	0	0	0	0	0	0	0	0	0	0	0	41	0	0	0	0	0	0	0	0	0	0	0	0	132	0	0	0	0	0	0	0	0	0	0	0	0	68	0	0	0	0	0	0	0
393_Chaetodontidae	Chaetodon nippon	26	1	0	0	0	0	0	0	0	0	0	0	0	0	0	0	0	0	0	0	0	0	0	0	0	0	0	0	0	0	0	0	0	0	0	0	0	0	0	0	0	0	0	0	0	0	0	0
393_Chaetodontidae	Chaetodon vagabundus	3954	28	0	17	0	0	23	31	0	0	0	0	0	0	0	0	65	0	0	0	0	0	0	0	0	0	0	97	0	0	0	0	0	0	0	0	0	0	147	38	109	0	0	0	0	0	0	0
394_Pomacanthidae	Chaetodontoplus septentrionalis	215	4	0	0	0	0	0	0	0	0	0	0	0	0	0	0	0	0	0	0	0	0	0	0	0	0	0	0	0	0	0	0	0	0	0	0	0	0	0	0	0	0	0	0	0	0	0	0
394_Pomacanthidae	Pomacanthus semicirculatus	255	5	0	0	0	0	0	0	0	0	0	0	0	0	0	0	0	0	0	0	0	0	0	0	0	0	0	0	0	0	0	0	0	0	0	0	0	0	23	70	0	0	0	0	0	0	0	0
396_Pentacerotidae	Evistias acutirostris	191	3	0	0	0	0	0	0	0	0	0	0	0	0	0	0	0	0	0	0	0	0	0	0	0	0	0	0	0	0	0	0	0	0	0	0	0	0	0	0	0	0	0	0	0	0	0	0
396_Pentacerotidae	Histiopterus typus	14	1	0	0	0	0	0	0	0	0	0	0	0	0	0	0	0	0	0	0	0	0	0	0	0	0	0	0	0	0	0	0	0	0	0	0	0	0	0	0	0	0	0	0	0	0	0	0
399_Teraponidae	Rhynchopelates oxyrhynchus	918	16	25	0	0	0	0	0	0	0	0	0	0	45	0	0	0	0	0	0	0	0	0	0	0	0	0	0	0	0	0	0	0	18	0	0	0	0	0	0	0	0	0	0	0	0	0	0
399_Teraponidae	Terapon jarbua	970	13	0	0	0	0	0	0	0	0	0	0	0	0	0	0	0	0	0	0	0	0	0	0	0	0	0	0	0	0	0	0	0	0	0	0	0	0	0	0	0	0	0	0	0	0	0	19
400_Kuhliidae	Kuhlia mugil	8350	52	127	0	0	0	131	295	0	0	0	0	0	0	0	0	0	49	45	0	0	0	0	0	0	0	0	31	0	298	0	0	0	0	0	715	0	0	105	0	0	0	0	0	40	0	0	0
401_Oplegnathidae	Oplegnathus fasciatus	48348	242	255	0	15	35	0	0	21	335	0	226	199	0	0	0	0	144	92	27	279	280	612	17	280	0	16	114	0	0	0	260	76	0	50	0	0	0	0	0	0	0	57	0	0	0	533	0
401_Oplegnathidae	Oplegnathus punctatus	7596	87	0	14	0	51	0	0	0	0	0	93	0	19	0	71	0	28	15	0	0	0	0	0	0	183	51	0	119	0	0	0	0	0	0	0	0	0	0	129	151	30	0	0	0	0	0	0
402_Cirrhitidae	Cirrhitichthys aurens	48	2	0	0	0	0	0	0	0	0	0	0	0	0	0	0	0	0	0	0	0	0	0	0	0	0	0	0	0	0	0	0	0	0	0	0	0	0	0	0	0	0	0	0	0	0	0	0
402_Cirrhitidae	Cirrhitus pinnulatus	216	1	0	0	0	0	0	0	0	0	0	0	0	0	0	0	0	0	0	0	0	0	0	0	0	0	0	0	0	0	0	0	0	0	0	0	0	0	0	0	0	0	0	0	0	0	0	0
402_Cirrhitidae	Oxycirrhites typus	11	1	0	0	0	0	0	0	0	0	0	0	0	0	0	0	0	0	0	0	0	11	0	0	0	0	0	0	0	0	0	0	0	0	0	0	0	0	0	0	0	0	0	0	0	0	0	0
405_Cheilodactylidae	Cheilodactylus zebra	42	1	0	0	0	0	0	0	0	0	0	0	0	0	0	0	0	0	0	0	0	0	0	0	0	0	0	0	0	0	0	0	0	0	0	0	0	0	0	0	0	0	0	0	0	0	0	0
405_Cheilodactylidae	Cheilodactylus zonatus	76886	409	87	18	42	102	64	42	53	487	227	0	0	14	0	79	87	17	51	31	195	169	30	0	205	8	0	17	35	49	40	276	62	21	0	0	47	19	0	48	90	103	247	496	39	0	0	0
405_Cheilodactylidae	Cheilodactylus zonatus gotu1	139	5	0	0	0	0	0	0	0	0	0	0	0	0	0	0	0	0	0	0	0	0	0	0	0	0	0	0	0	0	0	0	0	0	0	0	0	53	0	0	0	0	40	0	0	0	0	0
407_Cepolidae	Acanthocepola indica	99	1	0	0	0	0	0	0	0	0	0	0	0	0	0	0	0	0	0	0	0	0	0	0	0	0	0	0	0	0	0	0	0	0	0	0	0	0	0	0	0	0	0	0	0	0	0	0
409_Cichlidae	Etroplus suratensis	16	1	0	0	0	0	0	0	0	0	0	0	0	0	0	0	0	0	0	0	0	0	0	0	0	0	0	0	0	0	0	0	0	0	0	0	0	0	0	0	0	0	0	0	0	0	0	0
410_Embiotocidae	Ditrema jordani	758	14	0	0	0	0	0	0	0	0	0	0	0	0	0	0	0	0	0	0	0	0	0	0	0	0	0	0	0	0	0	0	0	0	0	0	0	0	0	0	0	0	0	0	0	0	0	0
410_Embiotocidae	Ditrema jordani	13	1	0	13	0	0	0	0	0	0	0	0	0	0	0	0	0	0	0	0	0	0	0	0	0	0	0	0	0	0	0	0	0	0	0	0	0	0	0	0	0	0	0	0	0	0	0	0
410_Embiotocidae	Ditrema temminckii temminckii	116929	241	257	13	25	108	0	372	0	58	0	810	13	12	148	0	80	0	0	0	19	0	15	2453	0	125	0	0	0	0	246	0	0	165	3551	0	281	0	0	0	243	0	0	0	95	2339	394	0
410_Embiotocidae	Neoditrema ransonneti	1589	14	0	0	0	0	0	0	0	0	0	17	0	0	0	0	0	0	0	0	0	0	0	0	0	0	0	0	0	0	0	0	0	0	0	0	0	0	0	0	0	0	0	0	0	0	0	0
411_Pomacentridae	Abudefduf bengalensis	198	3	0	0	0	0	0	0	0	0	0	0	0	0	0	0	0	0	0	0	0	0	0	0	0	0	0	15	0	0	0	0	0	0	0	0	0	0	0	0	0	0	0	0	0	0	0	0
411_Pomacentridae	Abudefduf notatus	128	6	0	0	0	0	0	0	0	0	0	0	0	0	0	0	0	16	0	0	0	0	0	0	0	0	0	0	0	53	0	0	0	0	0	0	0	15	0	0	12	0	0	0	0	0	0	0
411_Pomacentridae	Abudefduf saxatilis	18	1	0	0	0	0	0	0	0	0	18	0	0	0	0	0	0	0	0	0	0	0	0	0	0	0	0	0	0	0	0	0	0	0	0	0	0	0	0	0	0	0	0	0	0	0	0	0
411_Pomacentridae	Abudefduf saxatilis gotu1	382	3	0	0	0	0	0	0	0	0	0	0	0	0	0	0	0	0	0	0	0	198	0	0	0	0	0	0	0	0	0	0	0	0	0	0	0	0	0	0	0	0	0	139	0	0	0	0
411_Pomacentridae	Abudefduf septemfasciatus	39	1	0	0	0	0	0	0	0	0	0	0	0	0	0	0	0	0	0	0	0	0	0	0	0	0	0	0	0	0	0	0	0	0	0	0	0	0	0	0	0	0	0	0	0	0	0	0
411_Pomacentridae	Abudefduf sexfasciatus	28100	138	0	16	233	0	102	282	66	0	178	158	0	0	0	0	205	53	376	19	0	549	343	0	0	0	187	199	0	299	44	29	496	149	56	0	0	0	294	253	712	0	0	181	139	176	0	0
411_Pomacentridae	Abudefduf sordidus	4433	48	0	22	14	0	0	0	0	0	0	0	59	0	0	0	19	27	0	0	0	0	0	0	0	0	27	1067	32	12	0	0	0	0	15	211	37	0	198	0	158	86	89	0	0	0	0	54
411_Pomacentridae	Abudefduf vaigiensis	14408	104	0	0	37	0	0	153	21	0	290	27	0	0	0	106	75	56	136	23	0	175	0	9	0	0	0	64	0	156	0	61	0	0	0	0	0	464	217	0	255	168	0	96	69	86	82	0
411_Pomacentridae	Chromis notata notata	254	4	0	0	0	0	0	0	0	0	0	0	0	0	0	0	0	0	0	0	0	0	0	0	0	0	0	0	0	0	0	0	0	0	0	0	0	0	0	0	0	0	0	0	0	0	0	0
411_Pomacentridae	Chrysiptera biocellata	37	1	0	0	0	0	0	0	0	0	0	0	0	0	0	0	0	0	0	0	0	0	0	0	0	0	0	0	0	0	0	0	0	0	0	0	0	0	0	0	0	0	0	0	0	0	0	0
411_Pomacentridae	Plectroglyphidodon leucozonus	1069	18	0	0	0	0	0	0	0	0	0	0	0	0	0	75	0	0	0	0	0	0	0	0	0	0	0	68	0	0	18	0	0	0	0	0	0	0	0	0	0	0	0	0	0	0	0	0
411_Pomacentridae	Pomacentrus caeruleopunctatus	58752	129	0	0	125	155	0	0	10	47	494	19	0	0	0	239	0	0	22	23	65	933	0	0	0	108	37	0	22	135	0	0	330	82	0	0	0	80	0	0	168	0	0	669	0	0	0	0
411_Pomacentridae	Pomacentrus pavo	70	1	0	0	0	0	0	0	0	0	0	0	0	0	0	0	0	0	0	0	0	0	0	0	0	0	0	0	0	0	0	0	0	0	0	0	0	0	0	0	0	0	0	0	0	0	0	0
411_Pomacentridae	Stegastes altus	13430	137	44	0	57	344	0	61	24	0	28	0	0	59	13	78	0	61	80	0	0	58	0	0	0	0	253	0	52	30	0	0	0	0	0	0	0	0	0	66	360	0	0	0	0	0	0	0
412_Labridae	Bodianus izuensis	13	1	0	0	0	0	0	0	0	0	0	0	0	0	0	0	0	0	0	0	0	0	0	0	0	0	0	0	0	0	0	0	0	0	0	0	0	0	0	0	0	0	0	0	0	0	0	0
412_Labridae	Bodianus oxycephalus	312	2	0	0	0	0	0	0	0	0	0	0	0	0	0	0	0	0	0	0	0	0	0	0	0	0	0	0	0	0	0	0	0	0	0	0	0	0	0	0	0	0	0	0	0	0	0	0
412_Labridae	Choerodon azurio	95	4	0	0	0	0	0	0	0	0	0	0	0	0	0	15	0	0	0	0	0	0	0	0	0	0	0	0	0	0	0	0	0	0	0	0	0	0	0	0	0	0	0	0	0	0	0	0
412_Labridae	Halichoeres poecilopterus	4337	66	101	0	0	0	0	0	0	0	0	25	0	18	48	0	0	0	0	0	0	0	18	20	0	0	0	16	0	0	0	63	0	29	0	0	0	0	0	0	35	0	0	0	0	94	0	0
412_Labridae	Halichoeres tenuispinis	16345	161	15	19	23	0	13	0	80	0	55	0	0	0	236	294	0	51	0	98	140	80	21	0	0	39	75	0	0	0	85	0	15	19	0	0	0	0	0	102	0	230	0	0	0	0	0	0
412_Labridae	Labroides dimidiatus	24	1	0	0	0	0	0	0	0	0	0	0	0	0	0	0	0	0	0	0	0	0	0	0	0	0	0	0	0	0	0	0	0	0	0	0	0	0	0	0	0	0	0	0	0	0	0	0
412_Labridae	Pseudojuloides elongatus	43	1	0	0	0	0	0	0	0	0	0	0	0	0	0	0	0	0	0	0	0	0	0	0	0	0	0	0	0	0	0	0	0	0	0	0	0	0	0	0	0	0	0	0	0	0	0	0
412_Labridae	Pseudolabrus eoethinus	31051	291	0	0	76	25	0	0	68	0	71	0	0	0	0	57	27	0	0	26	0	51	0	0	0	47	48	19	66	23	27	82	110	12	0	0	0	130	0	0	27	25	0	49	0	0	0	32
412_Labridae	Pseudolabrus sieboldi	31507	233	0	0	43	206	0	0	0	226	25	101	0	17	0	293	0	0	0	57	318	84	128	0	0	52	10	0	52	0	0	823	17	202	11	0	98	136	0	0	16	0	179	0	269	0	0	11
412_Labridae	Pteragogus aurigarius	48	3	0	0	0	0	0	0	0	0	0	0	0	0	0	0	0	0	0	0	0	0	0	0	0	0	0	0	0	0	0	0	0	0	0	0	0	0	0	0	0	0	24	0	0	0	0	0
412_Labridae	Semicossyphus reticulatus	5960	69	0	0	0	0	0	0	0	0	0	0	0	0	0	0	0	0	18	0	0	0	0	0	0	0	0	0	0	0	0	0	0	0	0	0	0	0	0	0	83	0	0	0	0	56	0	0
412_Labridae	Stethojulis interrupta terina	32639	227	12	251	228	0	169	290	507	144	249	0	0	0	597	302	607	245	45	212	59	460	17	61	0	110	104	540	101	91	416	34	141	0	0	0	99	193	223	20	26	706	0	450	0	26	124	16
412_Labridae	Stethojulis interrupta terina	16	1	0	0	0	0	0	0	0	0	0	0	0	0	0	0	0	0	0	0	0	0	0	0	0	0	0	0	0	0	0	0	0	0	0	0	0	0	0	0	0	0	0	0	0	0	0	0
412_Labridae	Suezichthys gracilis	25	1	0	0	0	0	0	0	0	0	0	0	0	0	0	0	0	0	0	0	0	0	0	0	0	0	0	0	0	0	0	0	0	0	0	0	0	0	0	0	0	0	0	0	0	0	0	0
412_Labridae	Thalassoma amblycephalum	94	2	0	0	0	0	0	0	0	0	0	0	0	0	0	0	0	0	0	0	0	0	0	0	0	0	0	0	0	0	0	0	0	0	0	0	0	0	0	0	33	0	0	0	0	0	0	0
412_Labridae	Thalassoma cupido	326773	436	245	142	165	1769	1600	2403	384	644	126	73	0	274	322	776	1587	2939	1218	401	140	181	14	0	1318	625	537	1050	2294	1475	280	126	111	30	0	1459	117	1583	1622	2482	2093	304	400	0	88	0	351	303
412_Labridae	Thalassoma lunare	285	5	51	0	0	0	0	0	0	0	0	0	0	0	0	0	0	0	0	0	0	0	0	0	0	0	0	0	0	0	0	0	0	0	0	0	0	0	0	0	0	0	0	0	0	0	0	0
412_Labridae	Thalassoma lutescens	218	4	0	0	0	0	0	0	0	0	0	0	0	0	0	0	0	0	0	0	0	0	0	0	0	0	0	0	0	0	0	0	0	0	0	0	0	0	0	0	0	0	0	0	0	0	0	0
412_Labridae	Thalassoma quinquevittatum	300	7	0	0	0	0	0	0	0	0	0	0	0	0	0	0	0	0	0	0	0	0	0	0	0	0	0	28	0	0	0	0	0	0	0	0	0	0	0	0	114	0	0	0	0	0	0	0
412_Labridae	Thalassoma trilobatum	228	5	0	0	0	0	0	0	0	0	0	0	0	0	0	0	0	0	0	0	0	0	0	0	0	0	0	0	0	0	0	0	0	0	0	0	0	0	0	0	0	0	0	0	0	0	0	0
414_Scaridae	Calotomus japonicus	8710	130	0	0	11	71	0	5	9	111	22	0	0	0	0	17	0	0	17	27	193	264	9	0	0	0	46	0	17	16	0	58	89	0	0	0	0	48	0	0	12	0	244	0	0	0	0	0
414_Scaridae	Calotomus spinidens	16	1	0	0	0	0	0	0	0	0	0	0	0	0	0	0	0	0	0	0	0	0	0	0	0	0	0	0	0	0	0	0	0	0	0	0	0	0	0	0	0	0	0	0	0	0	0	0
414_Scaridae	Leptoscarus vaigiensis	175	5	0	0	0	0	0	0	87	0	0	0	0	0	0	24	0	0	0	0	0	0	0	0	0	0	0	0	0	0	0	0	0	0	0	0	0	0	0	0	0	15	0	0	0	0	0	0
414_Scaridae	Scarus chameleon	144	2	0	0	0	0	0	0	0	0	0	0	0	0	0	0	0	0	0	0	0	0	0	0	0	0	0	0	0	0	0	0	0	0	0	0	0	0	0	0	0	0	0	0	0	0	0	0
414_Scaridae	Scarus ovifrons	67	4	0	0	0	0	0	0	0	0	0	0	0	0	0	0	0	0	0	0	0	0	0	0	0	0	0	0	0	0	0	0	0	0	0	0	0	0	0	0	0	0	0	0	0	0	0	0
417_Stichaeidae	Dictyosoma burgeri Form a	11913	84	0	0	0	0	0	0	0	0	49	0	0	0	0	0	0	0	0	0	0	0	33	42	0	0	0	0	0	0	0	0	0	0	0	0	0	0	0	0	0	0	0	0	29	37	0	0
417_Stichaeidae	Dictyosoma rubrimaculatum	126831	365	0	0	40	28	72	26	103	295	82	49	0	0	0	57	20	0	0	0	246	157	1508	210	0	0	22	91	0	0	18	592	81	1018	211	0	0	0	0	160	0	81	587	317	125	107	0	0
417_Stichaeidae	Eumesogrammus praecisus	55	1	0	0	0	0	0	0	0	0	0	0	0	0	0	0	0	0	0	0	0	0	0	0	0	0	0	0	0	0	0	0	0	0	0	0	0	0	0	0	0	0	0	0	0	0	0	0
417_Stichaeidae	Zoarchias glaber	30026	134	90	0	0	0	0	0	24	57	0	0	0	0	0	0	0	0	0	0	0	96	0	0	0	0	0	0	0	0	0	0	0	0	0	0	0	0	0	0	0	0	0	0	0	0	0	0
417_Stichaeidae	Zoarchias neglectus	76164	181	28	0	0	0	0	0	0	0	0	0	0	0	0	0	0	0	0	0	0	0	31	42	0	0	0	0	0	0	0	0	0	0	21	0	0	0	0	0	0	0	0	0	0	0	0	0
419_Pholidae	Pholis clemensi	2406	27	0	0	0	0	0	0	0	0	0	0	0	0	0	0	0	0	0	0	0	0	0	44	0	0	0	0	0	0	0	0	0	0	0	0	0	0	0	0	0	0	0	0	0	96	0	0
419_Pholidae	Pholis crassispina	636	4	0	0	0	0	0	0	0	0	0	0	0	0	0	0	0	0	0	0	0	0	0	0	0	0	0	0	0	0	0	0	0	0	0	0	0	0	0	0	0	0	0	0	0	0	0	0
419_Pholidae	Pholis nebulosa	2990	19	0	0	0	0	0	0	0	0	0	0	0	0	0	0	0	0	0	0	0	0	0	0	0	0	0	0	0	0	0	0	0	0	0	0	0	0	0	0	0	0	0	0	0	0	0	0
435_Pinguipedidae	Parapercis diplospilus	41	1	0	0	0	0	0	0	0	0	0	0	0	0	0	0	0	0	0	0	0	0	0	0	0	0	0	0	0	0	0	0	0	0	0	0	0	0	0	0	0	0	0	0	0	0	0	0
435_Pinguipedidae	Parapercis pulchella	20	1	0	0	0	0	0	0	0	0	0	0	0	0	0	0	0	0	0	0	0	0	0	0	0	0	0	0	0	0	0	0	0	0	0	0	0	0	0	0	0	0	0	0	0	0	0	0
435_Pinguipedidae	Parapercis snyderi	162	5	0	0	0	0	0	0	0	0	0	0	0	0	0	0	0	0	0	0	0	0	0	0	0	0	0	0	0	0	0	0	0	0	0	0	0	0	0	0	0	0	0	0	0	0	0	0
437_Trichonotidae	Trichonotus setiger	124	2	0	0	0	0	0	0	0	0	0	0	0	0	0	0	0	0	0	0	0	0	0	0	0	0	0	0	0	0	0	0	0	0	0	0	0	0	0	0	0	0	0	0	0	0	0	0
437_Trichonotidae	Trichonotus sp BSKU 65703	29	1	0	0	0	0	0	0	0	0	0	0	0	0	0	0	0	0	0	0	0	0	0	0	0	0	0	0	0	0	0	0	0	0	0	0	0	0	0	0	0	0	0	0	0	0	0	0
441_Ammodytidae	Ammodytes hexapterus	12	1	0	0	0	0	0	0	0	0	0	0	0	0	0	0	0	0	0	0	0	0	0	0	0	0	0	0	0	0	0	0	0	0	0	0	0	0	0	0	0	0	0	0	0	0	0	0
441_Ammodytidae	Ammodytes personatus	458	2	0	0	0	0	0	0	0	0	0	0	0	0	0	0	0	0	0	0	0	0	0	0	0	0	0	0	0	0	0	0	0	0	0	0	0	0	0	0	0	0	0	0	0	0	0	0
443_Uranoscopidae	Uranoscopus chinensis	59	2	0	0	0	0	0	0	0	0	0	0	0	0	0	0	0	0	0	0	0	0	0	0	0	0	0	0	0	0	0	0	0	0	0	0	0	0	0	0	0	0	0	0	0	0	0	0
445_Tripterygiidae	Enneapterygius erythrosoma	24	1	0	0	0	0	0	0	0	0	0	0	0	0	0	0	0	0	0	0	0	0	0	0	0	0	0	0	0	0	0	0	0	0	0	0	0	0	0	0	0	0	0	0	0	0	0	0
445_Tripterygiidae	Enneapterygius etheostomus	345006	378	0	0	3977	1872	2837	473	38	54	3731	66	0	12	0	2477	1771	106	113	25	0	103	348	31	303	342	787	393	571	0	0	0	509	495	0	0	0	1711	112	449	353	0	0	426	0	0	0	83
445_Tripterygiidae	Enneapterygius fuscoventer	11	1	0	0	0	0	0	0	0	0	0	0	0	0	0	0	0	0	0	0	0	0	0	0	0	0	0	0	0	0	0	0	0	0	0	0	0	0	0	0	0	0	0	0	0	0	0	0
445_Tripterygiidae	Enneapterygius leucopunctatus	127	4	0	0	0	0	0	0	0	0	0	0	0	0	0	0	0	0	13	0	0	0	0	0	0	0	0	0	0	0	0	0	0	0	0	0	0	0	0	0	0	0	0	0	0	0	0	0
445_Tripterygiidae	Enneapterygius philippinus	17	1	0	0	0	0	0	0	0	0	0	0	0	0	0	0	0	0	0	0	0	0	0	0	0	0	0	0	0	0	0	0	0	0	0	0	0	0	0	0	0	0	0	0	0	0	0	0
445_Tripterygiidae	Enneapterygius phoenicosoma	709	12	0	0	0	0	0	0	0	0	0	0	0	0	0	0	0	0	0	0	0	0	0	0	0	0	0	0	26	0	0	0	0	0	0	0	0	0	0	0	0	0	0	0	0	0	0	0
445_Tripterygiidae	Enneapterygius sp KAUM I 101347	39	1	0	0	0	0	0	0	0	0	0	0	0	0	0	0	0	0	0	0	0	0	0	0	0	0	0	0	0	0	0	0	0	0	0	0	0	0	0	0	0	0	0	0	0	0	0	0
445_Tripterygiidae	Springerichthys bapturus	13606	103	0	0	18	0	0	0	0	0	0	0	0	0	0	500	0	0	0	0	0	91	0	0	0	0	16	0	0	0	0	0	0	0	0	0	0	76	0	0	0	0	0	136	0	0	0	0
447_Blenniidae	Andamia tetradactyla	134	1	0	0	0	0	0	0	0	0	0	0	0	0	0	0	0	0	0	0	0	0	0	0	0	0	0	0	0	0	0	0	0	0	0	0	0	0	0	0	0	0	0	0	0	0	0	0
447_Blenniidae	Cirripectes imitator	126	3	0	0	0	0	0	0	0	0	0	0	0	0	0	0	0	0	0	0	0	0	0	0	0	0	0	0	0	0	0	0	0	0	0	0	0	0	0	0	0	0	0	0	0	0	0	0
447_Blenniidae	Entomacrodus caudofasciatus	8507	46	0	0	0	0	97	73	0	0	0	0	0	0	0	15	0	0	77	0	0	0	0	0	0	0	0	0	0	642	86	0	0	0	0	0	0	0	0	0	200	0	0	0	0	0	0	0
447_Blenniidae	Entomacrodus caudofasciatus	59	1	0	0	0	0	0	0	59	0	0	0	0	0	0	0	0	0	0	0	0	0	0	0	0	0	0	0	0	0	0	0	0	0	0	0	0	0	0	0	0	0	0	0	0	0	0	0
447_Blenniidae	Entomacrodus stellifer stellifer	160278	377	2056	0	51	183	335	1066	419	2218	200	274	0	234	19	807	118	697	211	412	77	357	94	34	657	0	10	0	32	259	70	124	309	39	0	683	0	0	0	469	633	48	672	1216	0	0	0	0
447_Blenniidae	Entomacrodus striatus	2573	29	0	0	0	0	13	0	34	0	0	0	0	35	0	64	0	50	0	0	0	0	0	0	0	0	0	0	179	0	0	0	0	0	0	0	0	0	0	0	0	0	0	0	0	0	0	0
447_Blenniidae	Entomacrodus striatus gotu1	115	2	0	0	0	0	0	0	0	0	0	0	0	0	0	0	0	0	0	0	0	0	0	0	0	0	0	0	0	0	0	0	0	0	0	0	0	0	0	0	0	0	0	0	0	0	0	0
447_Blenniidae	Entomacrodus striatus gotu2	194	4	0	0	0	0	0	0	0	0	0	0	0	0	0	0	0	0	0	0	0	0	0	0	0	0	0	0	0	0	0	0	0	0	0	0	0	0	0	0	0	0	0	0	0	0	0	0
447_Blenniidae	Entomacrodus thalassinus	2083	18	0	0	0	18	0	18	0	0	0	0	0	0	0	0	0	0	28	0	0	0	0	0	0	0	0	0	0	0	0	0	0	0	0	0	0	0	0	0	0	0	0	0	0	0	0	0
447_Blenniidae	Entomacrodus thalassinus	17	1	0	0	0	0	0	0	0	0	0	0	0	0	0	0	0	0	0	0	0	0	0	0	0	0	0	0	0	0	0	0	0	0	0	0	0	0	0	0	0	0	0	0	0	0	0	0
447_Blenniidae	Istiblennius edentulus	4277	29	46	0	0	0	0	0	0	0	0	0	0	0	0	0	0	0	27	0	0	0	0	0	0	0	0	0	0	0	0	0	0	0	0	0	116	0	46	0	0	0	0	0	0	0	0	0
447_Blenniidae	Istiblennius edentulus gotu1	279	3	0	0	0	0	0	0	0	0	0	0	0	0	0	0	0	0	0	0	0	0	0	0	0	0	0	0	0	0	0	0	0	0	0	0	0	0	0	0	0	0	0	0	0	0	0	0
447_Blenniidae	Istiblennius edentulus gotu2	77	2	0	0	0	0	0	0	0	0	0	0	0	0	0	0	0	0	0	0	0	0	0	0	0	0	0	0	0	0	0	0	0	0	0	0	0	0	0	0	0	0	0	0	0	0	0	0
447_Blenniidae	Istiblennius enosimae	711100	409	83	2677	1121	79	6347	2042	1079	83	3069	0	0	200	325	1471	2255	6740	1065	537	0	0	0	0	257	706	43	1160	1958	1810	333	0	0	0	0	918	417	573	556	2550	1173	454	0	0	0	0	633	524
447_Blenniidae	Omobranchus elegans	101540	292	0	15	0	0	0	17	259	0	413	0	17	210	0	0	128	0	0	206	152	328	84	245	0	60	0	0	0	0	102	0	189	121	281	0	0	0	47	0	0	106	0	0	17	626	254	0
447_Blenniidae	Omobranchus smithi	121	4	0	0	0	0	0	0	0	0	0	0	0	0	0	0	0	0	0	0	0	0	0	0	0	0	0	0	0	0	0	0	0	0	0	0	0	0	0	0	0	0	0	0	0	0	0	0
447_Blenniidae	Parablennius yatabei	131707	379	2315	350	0	0	94	0	272	293	22	18	1426	491	154	0	0	516	0	47	783	97	238	1625	543	113	16	119	0	0	130	244	0	289	1055	0	505	0	53	96	283	160	75	0	277	897	99	86
447_Blenniidae	Parablennius yatabei gotu1	142	4	0	0	0	0	0	0	0	0	0	0	0	0	0	0	0	0	0	0	0	0	0	0	0	0	0	0	0	0	0	0	0	0	0	0	0	0	0	0	0	0	0	0	0	0	0	0
447_Blenniidae	Petroscirtes breviceps	1048	21	0	0	0	0	0	0	0	0	0	0	0	0	0	0	0	0	0	0	0	0	13	0	0	0	0	24	0	0	29	0	0	0	0	0	0	0	0	0	0	0	0	226	0	0	0	0
447_Blenniidae	Petroscirtes breviceps	58	1	0	0	0	0	0	0	0	0	0	0	0	0	0	0	0	0	0	0	0	0	0	0	0	0	0	0	0	0	0	0	0	0	0	0	0	0	0	0	0	0	0	0	0	0	0	0
447_Blenniidae	Petroscirtes mitratus	840	10	0	0	0	0	0	0	0	0	0	0	0	0	0	0	0	0	0	0	0	0	0	0	0	0	0	0	0	0	0	0	0	0	0	0	0	0	0	0	0	0	0	0	0	0	0	0
447_Blenniidae	Praealticus margaritarius	71	1	0	0	0	0	0	0	0	0	0	0	0	0	0	0	0	0	0	0	0	0	0	0	0	0	0	0	0	0	0	0	0	0	0	0	0	0	0	0	0	0	0	0	0	0	0	0
447_Blenniidae	Rhabdoblennius nitidus	391	6	0	0	0	0	33	0	0	0	0	0	0	0	0	0	0	0	0	0	0	0	0	0	0	0	0	0	0	0	0	0	0	0	0	0	0	0	0	0	0	0	0	0	0	0	0	0
447_Blenniidae	Salarias luctuosus	25	1	0	0	0	0	0	0	0	0	0	0	0	0	0	0	0	0	0	0	0	0	0	0	0	0	0	0	0	0	0	0	0	0	0	0	0	0	0	0	0	0	0	0	0	0	0	0
447_Blenniidae	Scartella cristata	26	1	0	0	0	0	0	0	0	0	0	0	0	0	0	0	0	0	0	0	0	0	0	0	0	0	0	0	0	0	0	0	0	0	0	0	0	0	0	0	0	0	0	0	0	0	0	0
450_Chaenopsidae	Neoclinus bryope	128423	238	0	63	0	0	0	0	166	0	235	0	0	0	32	0	0	0	0	136	0	735	266	311	0	0	0	0	0	0	0	0	291	0	117	0	0	0	0	0	0	26	0	0	77	249	0	0
450_Chaenopsidae	Neoclinus bryope gotu1	436	12	0	0	0	0	0	0	0	0	0	0	0	0	0	0	0	0	0	0	0	0	0	0	0	0	0	0	0	0	0	0	0	0	0	0	0	0	0	0	0	0	0	0	0	0	0	0
450_Chaenopsidae	Neoclinus nudus gotu1	8996	29	0	0	0	0	0	0	0	0	0	43	0	0	0	0	0	0	0	0	0	0	0	0	0	0	0	0	0	0	0	0	0	0	0	0	0	0	0	0	0	0	0	0	0	0	0	0
450_Chaenopsidae	Neoclinus nudus gotu2	24334	80	0	0	0	0	0	0	0	0	0	0	0	0	0	0	0	0	0	0	0	0	50	0	0	0	0	0	0	0	0	0	0	0	0	0	0	0	0	0	0	0	0	0	0	0	0	0
450_Chaenopsidae	Neoclinus nudus gotu3	2841	2	0	0	0	0	0	0	0	0	0	0	0	0	0	0	0	0	0	0	0	0	0	0	0	0	0	0	0	0	0	0	0	0	0	0	0	0	0	0	0	0	0	0	0	0	0	0
450_Chaenopsidae	Neoclinus nudus gotu4	369	4	0	0	0	0	0	0	0	0	0	0	0	0	0	0	0	0	0	0	0	0	0	0	0	0	0	0	0	0	0	0	0	0	0	0	0	0	0	0	0	0	0	0	0	0	0	0
450_Chaenopsidae	Neoclinus nudus gotu5	366	3	0	0	0	0	0	0	0	0	0	0	0	0	0	0	0	0	0	0	0	0	0	0	0	0	0	0	0	0	0	0	0	0	0	0	0	0	0	0	0	0	0	0	0	0	0	0
450_Chaenopsidae	Neoclinus nudus gotu6	608	6	0	0	0	0	0	0	0	0	0	0	0	0	0	0	0	0	0	0	0	0	0	0	0	0	0	0	0	0	0	0	0	0	0	0	0	0	0	0	0	0	0	0	0	0	0	0
450_Chaenopsidae	Neoclinus nudus gotu7	12	1	0	0	0	0	0	0	0	0	0	0	0	0	0	0	0	0	0	0	0	0	0	0	0	0	0	0	0	0	0	0	0	0	0	0	0	0	0	0	0	0	0	0	0	0	0	0
452_Gobiesocidae	Aspasma minima	1653	58	0	0	0	33	0	0	0	0	0	0	0	0	0	30	0	0	0	0	0	0	0	0	31	0	0	0	0	9	0	0	0	0	0	0	0	0	0	0	0	0	0	0	0	0	0	0
452_Gobiesocidae	Conidens laticephalus	6737	61	0	0	0	81	0	0	0	35	247	0	0	0	0	0	0	25	0	0	0	0	0	0	0	0	0	0	57	0	0	0	0	0	0	0	0	0	0	18	0	0	0	0	0	0	0	0
452_Gobiesocidae	Discotrema lineata	60	1	0	0	0	0	0	0	0	0	0	0	0	0	0	0	0	0	0	0	60	0	0	0	0	0	0	0	0	0	0	0	0	0	0	0	0	0	0	0	0	0	0	0	0	0	0	0
452_Gobiesocidae	Lepadichthys frenatus	92	4	0	0	0	0	0	0	0	0	0	0	0	0	0	0	0	0	0	0	0	0	0	0	0	0	30	0	0	0	0	0	0	0	0	0	0	0	0	0	0	0	0	0	0	0	0	0
452_Gobiesocidae	Lepadichthys frenatus gotu1	724	23	0	0	0	0	0	0	0	0	0	0	0	0	0	0	0	0	0	0	0	52	0	0	0	0	0	0	0	0	0	0	0	82	0	0	0	0	0	0	0	0	0	0	0	0	0	0
453_Callionymidae	Callionymus enneactis	27	1	0	0	0	0	0	0	0	0	0	0	0	0	0	0	0	0	0	0	0	0	0	0	0	0	0	0	0	0	0	0	0	0	0	0	0	0	0	0	0	0	0	0	0	0	0	0
453_Callionymidae	Callionymus guenther	15	1	0	0	0	0	0	0	0	0	0	0	0	0	0	0	0	0	0	0	0	0	0	0	0	0	0	0	0	0	0	0	0	0	0	0	0	0	0	0	0	0	0	0	0	0	0	0
453_Callionymidae	Callionymus meridionalis gotu1	160	5	0	0	0	0	0	0	0	8	0	0	0	0	0	0	0	0	0	0	0	0	0	0	0	0	0	0	0	0	0	0	0	0	0	0	0	0	0	0	0	0	0	0	0	0	0	0
453_Callionymidae	Calliurichthys izuensis	61	2	0	0	0	0	0	0	0	0	0	0	0	0	0	0	0	0	0	0	0	0	0	0	0	0	0	0	0	0	0	0	0	0	0	0	0	0	0	0	0	0	0	0	0	0	0	0
453_Callionymidae	Calliurichthys izuensis gotu1	507	8	0	0	0	0	0	0	0	0	0	0	0	0	0	0	0	0	0	0	0	0	0	0	0	0	0	0	0	0	0	0	100	0	0	0	0	0	0	0	0	0	0	0	0	0	0	0
453_Callionymidae	Paradiplogrammus enneactis	7	1	0	0	0	0	0	0	0	0	0	0	0	0	0	0	0	0	0	0	0	0	0	0	0	0	0	0	0	0	0	0	0	0	0	0	0	0	0	0	0	0	0	0	0	0	0	0
453_Callionymidae	Repomucenus beniteguri	931	22	0	0	0	15	0	0	0	0	0	0	181	0	0	0	0	0	0	0	0	0	12	47	0	0	0	0	0	0	0	0	0	0	47	0	0	0	0	0	0	0	0	0	0	0	0	0
453_Callionymidae	Repomucenus curvicornis	1499	26	118	0	0	0	0	0	0	18	0	0	0	24	0	0	0	0	0	0	0	0	0	0	0	0	0	0	0	0	0	0	0	0	23	0	0	0	0	0	0	0	0	0	0	0	0	0
453_Callionymidae	Repomucenus sp KAUM I 94720	117	1	0	0	0	0	0	0	0	0	0	0	0	0	0	0	0	0	0	0	0	0	0	0	0	0	0	0	0	0	0	0	0	0	0	0	0	0	0	0	0	0	0	0	0	0	0	0
453_Callionymidae	Repomucenus valenciennei	65	2	0	0	0	0	0	0	0	0	0	0	0	0	0	0	0	0	0	0	0	0	0	0	0	0	0	0	0	0	0	0	0	0	25	0	0	0	0	0	0	0	0	0	0	0	0	0
453_Callionymidae	Repomucenus valenciennei gotu1	26	1	0	0	0	0	0	0	0	0	0	0	0	0	0	0	0	0	0	0	0	0	0	0	0	0	0	0	0	0	0	0	0	0	0	0	0	0	0	0	0	0	0	0	0	0	0	0
453_Callionymidae	Repomucenus valenciennei gotu2	25	1	0	0	0	0	0	0	0	0	0	0	0	0	0	0	0	0	0	0	0	0	0	0	0	0	0	0	0	0	0	0	0	0	0	0	0	0	0	0	0	0	0	0	0	0	0	0
457_Eleotridae	Eleotris oxycephala	73	1	0	0	0	0	0	0	0	0	0	0	0	0	0	0	0	0	0	0	0	0	0	0	0	0	0	0	0	0	0	0	0	0	0	0	0	0	0	0	0	0	0	0	0	0	0	0
460_Gobiidae	Acanthogobius flavimanus	22188	104	19	0	16	63	0	0	0	37	0	0	0	1551	200	155	93	29	184	78	158	92	318	32	411	0	16	0	0	0	64	223	0	42	10	0	0	0	0	0	0	0	148	0	0	0	277	0
460_Gobiidae	Acanthogobius lactipes	90	3	0	0	0	0	0	0	0	0	0	0	0	0	0	0	0	0	0	0	0	0	0	0	0	0	0	0	0	0	0	0	0	0	0	0	0	0	0	0	0	0	0	0	0	0	0	0
460_Gobiidae	Acentrogobius multifasciatus	89	2	0	0	0	0	0	0	0	0	0	0	0	0	0	0	0	0	0	0	0	0	0	0	0	0	0	0	0	0	0	0	0	0	0	0	0	0	0	0	0	0	0	0	0	0	0	0
460_Gobiidae	Acentrogobius pflaumii	157	5	0	0	0	0	0	0	0	0	0	0	0	0	0	0	0	0	0	0	0	0	0	0	58	0	0	0	0	0	0	0	0	0	0	0	0	0	0	0	0	0	0	0	0	0	0	0
460_Gobiidae	Acentrogobius virgatulus	485	12	0	0	0	0	0	0	0	0	0	0	29	0	0	0	0	19	0	0	0	0	0	0	0	0	0	0	0	0	0	0	0	0	0	0	0	0	0	0	0	0	0	0	0	0	0	103
460_Gobiidae	Amblygobius phalaena	31	1	0	0	0	0	0	0	0	0	0	0	0	0	0	0	0	0	0	0	0	0	0	0	0	0	0	0	0	0	0	0	0	0	0	0	0	0	0	0	0	0	0	0	0	0	0	0
460_Gobiidae	Amoya moloanus	24	1	0	0	0	0	0	0	0	0	0	0	0	0	0	0	0	0	0	0	0	0	0	0	0	0	0	0	0	0	0	0	0	0	0	0	0	0	0	0	0	0	0	0	0	0	0	0
460_Gobiidae	Asterropteryx semipunctata	254	4	0	0	0	0	0	0	0	0	0	0	0	0	0	0	0	0	0	0	0	0	0	0	0	0	0	0	51	0	0	0	0	0	0	0	0	0	0	0	0	0	0	0	0	0	0	0
460_Gobiidae	Astrabe lacticella	3380	29	0	0	0	0	19	0	0	0	0	0	0	0	0	49	222	0	0	0	0	0	0	0	393	73	0	0	75	0	0	0	0	0	0	0	0	0	0	0	0	0	0	0	0	0	107	0
460_Gobiidae	Astrabe lacticella gotu1	254	3	0	0	0	0	0	0	0	0	0	0	0	0	0	0	0	0	0	0	0	0	0	0	0	0	0	0	0	0	0	0	0	0	0	0	0	0	0	0	0	0	0	0	0	0	0	0
460_Gobiidae	Barbuligobius boehlkei	81	2	0	0	0	0	0	0	0	0	0	0	0	0	0	0	0	0	0	0	0	0	0	0	0	0	0	0	0	0	0	0	0	0	0	0	0	0	0	0	0	0	0	0	0	0	0	0
460_Gobiidae	Bathygobius coalitus	115	3	0	0	0	0	0	0	0	0	0	0	0	0	0	0	0	0	0	0	0	0	0	0	0	0	0	0	0	0	0	0	0	0	0	0	0	0	0	0	0	0	0	0	0	0	0	0
460_Gobiidae	Bathygobius cocosensis	694	18	0	0	0	0	0	0	0	0	0	0	0	0	0	0	14	0	0	0	0	0	0	0	0	0	0	42	0	0	0	0	0	0	0	0	0	0	0	0	0	0	0	0	0	0	0	0
460_Gobiidae	Bathygobius cotticeps	34	1	0	0	0	0	0	0	0	0	0	0	0	0	0	0	0	0	0	0	0	0	0	0	0	0	0	0	0	0	0	0	0	0	34	0	0	0	0	0	0	0	0	0	0	0	0	0
460_Gobiidae	Bathygobius cyclopterus	1671	7	0	0	0	0	0	0	0	0	0	0	0	0	0	0	0	0	0	0	0	0	0	0	0	0	0	0	0	0	0	0	0	0	0	0	0	0	0	16	0	0	0	0	0	0	0	0
460_Gobiidae	Bathygobius fuscus	34513	171	0	234	0	0	84	155	0	0	126	0	0	0	0	0	150	0	95	95	0	0	0	0	0	47	0	23	0	28	17	0	0	36	0	0	225	0	185	14	193	51	0	0	0	0	0	51
460_Gobiidae	Bathygobius laddi	86	2	0	0	0	0	0	0	0	0	0	0	0	0	0	0	0	0	0	0	0	0	0	0	0	0	0	0	0	0	0	0	0	0	0	0	0	0	0	0	0	0	0	0	0	0	0	0
460_Gobiidae	Bathygobius sp CBM ZF 17917	44	1	44	0	0	0	0	0	0	0	0	0	0	0	0	0	0	0	0	0	0	0	0	0	0	0	0	0	0	0	0	0	0	0	0	0	0	0	0	0	0	0	0	0	0	0	0	0
460_Gobiidae	Callogobius snelliusi	343	3	0	0	0	0	0	0	0	0	0	0	0	0	0	0	0	0	0	0	0	0	0	0	0	0	0	0	0	0	0	0	0	0	0	0	0	0	0	134	0	0	0	0	0	0	0	0
460_Gobiidae	Callogobius sp KAUM I 104414	151	2	0	0	0	0	0	0	0	0	0	0	0	0	0	0	0	0	0	0	0	0	0	0	0	0	0	0	0	0	0	0	0	0	0	0	0	0	0	0	0	0	0	0	0	0	0	0
460_Gobiidae	Callogobius sp KAUM I 99028	290	1	0	0	0	0	0	0	0	0	0	0	0	0	0	0	0	0	0	0	0	0	0	0	0	0	0	0	0	0	0	0	0	0	0	0	0	0	0	0	0	0	0	0	0	0	0	0
460_Gobiidae	Chaenogobius annularis	421791	471	4836	1587	329	460	1093	301	614	0	386	56	653	2142	543	216	2234	666	358	1112	185	403	69	1494	2582	3199	65	3669	255	962	707	0	172	0	969	1312	527	48	1178	394	70	75	0	0	0	937	2011	525
460_Gobiidae	Chaenogobius annularis	13	1	0	0	0	0	0	0	0	0	0	0	0	0	0	0	0	0	0	0	0	0	0	0	0	0	0	0	0	0	0	0	0	0	0	0	0	0	0	13	0	0	0	0	0	0	0	0
460_Gobiidae	Chaenogobius gulosus	109082	269	0	3230	15	0	15	11	18	65	80	0	0	0	281	0	0	72	40	284	113	0	0	27	0	1308	0	0	0	150	187	0	0	0	0	0	5008	511	54	0	0	71	0	0	0	300	0	1463
460_Gobiidae	Clariger cosmurus	7607	89	0	57	0	0	0	0	0	0	0	0	0	0	96	0	0	38	0	0	98	0	0	0	0	0	0	15	0	0	81	0	0	0	0	0	0	0	0	0	0	24	0	0	0	0	0	26
460_Gobiidae	Clariger papillosus	3823	54	0	0	14	94	0	0	0	0	0	0	0	0	0	0	0	131	0	0	0	69	0	0	0	256	0	11	10	0	0	0	0	0	0	0	0	0	0	0	0	0	0	0	0	0	0	0
460_Gobiidae	Clariger papillosus gotu1	220	3	0	0	0	0	13	0	0	0	0	0	0	0	0	0	0	0	0	0	0	0	0	0	0	0	0	0	0	0	0	0	0	0	0	0	0	0	0	0	0	0	0	0	0	0	0	0
460_Gobiidae	Clariger papillosus gotu2	49	1	0	0	0	0	0	0	0	0	0	0	0	0	0	0	0	0	0	0	0	0	0	0	0	0	0	0	0	0	0	0	0	0	0	0	0	0	0	0	0	0	0	0	0	0	0	0
460_Gobiidae	Clariger sp CBM ZF 18879	3811	48	0	0	0	24	0	0	0	0	0	0	0	0	0	0	0	57	0	0	0	0	0	0	0	22	0	70	0	0	0	0	0	0	0	0	0	0	0	0	0	0	53	0	0	0	0	0
460_Gobiidae	Clariger sp SHIROHIGE SEJIROHAZE	4206	63	0	0	0	14	0	0	0	0	0	0	0	0	0	0	69	0	0	0	0	0	0	0	0	0	0	0	0	0	0	0	0	0	0	0	0	0	0	72	0	0	0	0	0	0	0	0
460_Gobiidae	Clariger sp SHIROHIGE SEJIROHAZE Genetype2	5233	68	12	0	0	20	20	0	0	0	0	0	27	0	33	0	0	33	0	0	74	0	0	0	0	0	0	0	0	0	0	0	0	0	18	0	0	0	0	0	0	0	0	0	0	19	0	0
460_Gobiidae	Drombus sp KUROKO HAZE	25	1	0	0	0	0	0	0	0	0	0	0	0	0	0	0	0	0	0	0	0	0	0	0	0	0	0	0	0	0	0	0	0	0	0	0	0	0	0	0	0	0	0	0	0	0	0	0
460_Gobiidae	Eviota abax	39048	274	0	85	260	0	48	29	0	0	33	22	0	0	296	230	71	138	12	0	82	148	116	0	0	75	20	0	45	0	0	0	0	382	0	0	43	305	48	123	0	0	0	17	114	0	0	51
460_Gobiidae	Eviota guttata	10	1	0	0	0	0	0	0	0	0	0	0	0	0	0	0	0	0	0	0	0	0	0	0	0	0	0	0	0	0	0	0	0	0	0	0	0	0	0	0	0	0	0	0	0	0	0	0
460_Gobiidae	Eviota korechika	217	4	0	0	0	0	0	0	0	0	0	0	0	0	0	0	0	0	0	0	0	0	0	0	0	0	0	0	0	0	0	0	0	0	0	0	0	0	0	0	0	0	0	0	0	0	0	0
460_Gobiidae	Eviota masudai	489	5	0	0	0	0	0	0	0	0	0	0	0	0	0	0	0	0	0	0	0	0	0	0	0	0	0	0	0	0	0	0	0	0	0	0	0	0	0	0	0	0	0	382	0	0	0	0
460_Gobiidae	Eviota masudai gotu1	687	4	0	0	0	0	0	0	0	0	0	0	0	0	0	0	0	0	0	0	0	0	0	0	0	0	0	0	0	0	0	0	0	0	0	0	0	0	0	0	0	0	0	0	0	0	0	0
460_Gobiidae	Eviota punctulata	602	17	0	0	0	0	0	58	0	0	0	0	0	0	0	0	0	0	12	0	0	0	0	0	0	0	0	0	0	0	0	0	0	0	0	0	0	0	0	0	0	0	0	0	0	0	0	0
460_Gobiidae	Favonigobius gymnauchen	203	5	0	0	0	0	0	0	0	0	0	0	0	0	0	0	0	0	0	0	0	0	0	0	0	0	0	0	0	0	0	0	0	0	0	0	0	0	0	0	0	0	0	0	0	0	0	0
460_Gobiidae	Favonigobius sp CBM ZF 19041	24	1	0	0	0	0	0	0	0	0	0	0	0	0	0	0	0	0	0	0	0	0	0	0	0	0	0	0	0	0	0	0	0	0	0	0	0	0	0	0	0	0	0	0	0	0	0	0
460_Gobiidae	Gnatholepis cauerensis	24	1	0	0	0	0	0	0	0	0	0	0	0	0	0	0	0	0	0	0	0	0	0	0	0	0	0	0	0	0	0	0	0	0	0	0	0	0	0	0	0	0	0	0	0	0	0	0
460_Gobiidae	Gobiodon quinquestrigatus KAUM I 63272	16	1	0	0	0	0	0	0	0	0	0	0	0	0	0	0	0	0	0	0	0	0	0	0	0	0	0	0	0	0	0	0	0	0	0	0	0	0	0	0	0	0	0	0	0	0	0	0
460_Gobiidae	Gymnogobius breunigii	524	6	0	0	0	0	0	0	0	0	0	0	0	0	0	0	0	0	0	0	0	0	0	0	0	0	0	0	0	0	0	0	0	0	9	0	0	0	0	0	0	0	0	0	0	0	0	0
460_Gobiidae	Gymnogobius castaneus	521	2	0	0	0	0	0	0	0	0	0	0	0	0	0	0	0	0	0	0	0	0	0	0	0	0	0	0	0	0	0	0	0	0	0	0	0	0	0	0	0	0	0	0	0	0	0	0
460_Gobiidae	Gymnogobius cylindricus	14	1	0	0	0	0	0	0	0	0	0	0	0	0	0	0	0	0	0	0	0	0	0	0	0	0	0	0	0	0	0	0	0	0	0	0	0	14	0	0	0	0	0	0	0	0	0	0
460_Gobiidae	Gymnogobius heptacanthus	1109	8	0	0	0	0	0	0	0	0	0	0	0	0	0	0	0	0	0	0	0	0	0	0	214	0	0	0	0	0	0	0	0	0	0	0	0	0	0	0	0	0	0	0	55	0	0	0
460_Gobiidae	Gymnogobius opperiens	1466	20	0	0	0	0	0	0	0	0	0	0	23	0	0	0	0	0	0	0	0	0	0	0	0	0	0	0	0	0	0	0	0	0	0	0	0	0	0	0	0	0	0	0	0	0	0	0
460_Gobiidae	Gymnogobius petschiliensis	147	3	0	0	0	0	0	0	0	0	0	0	0	0	0	0	0	0	0	0	0	0	0	0	0	0	0	0	0	0	0	0	0	0	0	0	0	0	0	0	0	0	0	0	0	0	0	0
460_Gobiidae	Gymnogobius urotaenia	378	5	0	0	0	0	0	0	0	0	0	0	0	0	0	0	0	0	0	0	0	0	0	0	0	0	0	0	0	0	0	0	0	0	0	0	0	0	0	0	0	0	0	0	0	0	0	0
460_Gobiidae	Inu ama	1396	23	0	0	0	29	0	0	0	0	0	0	0	0	0	0	0	0	0	0	0	0	0	0	0	0	0	0	0	0	0	0	0	0	0	0	0	0	20	0	0	0	0	0	0	0	0	0
460_Gobiidae	Inu koma	901	14	0	0	0	0	15	0	0	0	0	0	0	0	0	0	0	0	0	0	0	0	0	0	0	0	0	0	0	0	0	0	0	0	0	0	0	0	0	0	0	0	0	0	0	0	0	0
460_Gobiidae	Istigobius campbelli	6410	96	0	26	0	0	128	0	0	0	56	0	0	0	107	0	0	0	0	0	0	110	0	0	0	0	0	0	46	0	0	0	0	0	0	0	171	0	0	13	0	0	0	98	0	0	0	0
460_Gobiidae	Istigobius campbelli KAUM I 66130	91	4	0	0	0	0	0	0	0	0	0	0	0	0	0	0	0	0	0	0	0	0	0	0	0	0	0	0	0	0	0	0	0	0	0	0	0	0	0	0	0	0	0	0	0	0	0	0
460_Gobiidae	Istigobius hoshinonis	408	3	0	0	0	0	0	0	0	0	0	0	0	0	0	0	0	0	0	0	197	0	0	0	0	0	0	0	0	0	0	0	0	0	0	0	0	0	0	0	0	0	0	0	0	0	0	0
460_Gobiidae	Lentipes armatus	134	2	0	0	0	0	0	0	0	0	0	0	0	0	0	0	0	0	0	0	0	0	0	0	0	0	0	0	0	0	0	0	0	0	0	0	0	0	0	0	0	0	0	0	0	0	0	0
460_Gobiidae	Leucopsarion petersii	711	22	0	0	0	50	0	0	0	0	0	0	0	0	0	0	0	0	0	0	0	28	21	0	0	0	0	0	0	0	0	0	0	0	0	0	0	0	0	0	0	0	0	0	13	0	0	0
460_Gobiidae	Luciogobius grandis gotu1	1745	2	0	0	0	0	0	0	0	0	0	0	0	0	0	0	0	0	0	0	0	0	0	0	0	0	0	0	0	0	0	0	0	0	0	0	0	0	0	0	0	0	0	0	0	0	0	0
460_Gobiidae	Luciogobius guttatus	64	2	0	0	0	0	0	0	0	0	0	0	0	0	0	0	0	0	0	0	0	0	0	0	0	0	0	0	0	0	0	0	0	0	0	0	15	0	0	0	0	0	0	0	0	0	0	0
460_Gobiidae	Luciogobius parvulus	433	6	0	0	0	0	0	0	0	19	0	0	0	0	0	0	0	0	0	0	0	0	0	0	0	0	0	157	0	0	0	0	0	0	0	0	0	0	0	0	0	0	0	0	0	0	0	0
460_Gobiidae	Luciogobius platycephalus	439	13	0	0	0	0	0	0	0	0	0	0	0	0	0	0	0	0	0	0	0	0	0	0	0	0	0	0	0	0	0	0	0	0	0	0	0	0	0	0	0	0	0	0	0	0	0	0
460_Gobiidae	Luciogobius platycephalus Genetype1	118	4	0	0	0	0	0	0	0	0	0	0	0	0	0	0	0	0	0	0	0	0	0	0	0	0	0	0	0	0	0	0	0	0	0	0	0	0	0	0	0	0	0	0	0	0	0	0
460_Gobiidae	Luciogobius sp BAKE MIMIZU HAZE	27	1	0	0	0	0	0	0	0	0	0	0	0	0	0	0	0	0	0	0	0	0	0	0	0	0	0	0	0	0	0	0	0	0	0	0	0	0	0	0	0	0	0	0	0	0	0	0
460_Gobiidae	Luciogobius sp BAKE MIMIZU HAZE	13	1	0	0	0	0	0	0	0	0	0	0	0	0	0	0	0	0	0	0	0	0	0	0	0	0	0	0	0	0	0	0	0	0	0	0	0	0	0	0	0	0	0	0	0	0	0	0
460_Gobiidae	Luciogobius sp DAIDAI ISO MIMIZU HAZE gotu1	240	2	0	0	0	0	0	0	0	0	0	0	0	0	0	0	0	0	0	0	0	0	0	0	0	0	0	0	0	0	0	0	0	0	0	0	0	0	0	0	0	0	0	0	0	0	0	0
460_Gobiidae	Luciogobius sp MIZUHIKI NAGA MIMIZU HAZE gotu1	18	1	0	0	0	0	0	0	0	0	0	0	0	0	0	0	0	0	0	0	0	0	0	0	0	0	0	0	0	0	0	0	0	0	0	0	0	0	0	0	0	0	0	0	0	0	0	0
460_Gobiidae	Luciogobius sp MIZUHIKI NAGA MIMIZU HAZE gotu2	12	1	0	0	0	0	0	0	0	0	0	0	0	0	0	0	0	0	0	0	0	0	0	0	0	0	0	0	0	0	0	0	0	0	0	0	0	0	0	0	0	0	0	0	0	0	0	0
460_Gobiidae	Parkraemeria saltator	43	1	0	0	0	0	0	0	0	0	0	0	0	0	0	0	0	0	0	0	0	0	0	0	0	0	0	0	0	0	0	0	0	0	0	0	0	0	0	0	0	0	0	0	0	0	0	0
460_Gobiidae	Priolepis latifascima	52	2	0	0	0	0	0	0	0	0	0	0	0	0	0	0	0	0	0	0	0	0	0	0	0	0	0	0	0	0	0	0	0	0	0	0	0	0	0	0	0	0	0	0	0	0	0	0
460_Gobiidae	Priolepis semidoliata	17	1	0	0	0	0	0	0	0	0	0	0	0	0	0	0	0	0	0	0	0	0	0	0	0	0	0	0	0	0	0	0	0	0	0	0	0	0	0	0	0	0	0	0	0	0	0	0
460_Gobiidae	Pseudogobius masago	53	2	0	0	0	0	0	0	0	0	0	0	0	0	0	0	0	0	0	0	0	0	0	0	0	0	0	0	0	0	0	0	0	0	0	0	0	0	0	0	0	0	0	0	0	0	0	0
460_Gobiidae	Pterogobius elapoides	45808	256	48	63	192	106	0	0	489	266	146	26	0	0	607	166	331	178	0	135	585	0	0	39	0	20	348	128	15	0	302	143	0	82	86	0	92	30	19	0	0	17	577	0	0	48	151	201
460_Gobiidae	Pterogobius virgo	265	2	0	0	0	0	0	0	0	0	0	0	0	0	0	0	0	0	0	0	0	0	0	0	0	0	0	0	0	0	0	0	0	0	0	0	0	0	0	0	0	0	0	0	0	0	0	0
460_Gobiidae	Pterogobius zacalles	92	1	0	0	0	0	0	0	0	0	0	0	0	0	0	0	0	0	0	0	0	0	0	0	0	0	0	0	0	0	0	0	0	0	0	0	0	0	0	0	0	0	0	0	0	0	0	0
460_Gobiidae	Pterogobius zonoleucus	20698	121	0	27	147	0	0	0	0	40	38	1302	0	0	311	136	0	0	0	0	566	0	294	0	0	0	0	0	0	0	0	0	0	368	0	0	0	288	0	0	0	0	129	0	21	0	154	45
460_Gobiidae	Redigobius bikolanus	127	1	0	0	0	0	0	0	0	0	0	0	0	0	0	0	0	0	0	0	0	0	0	0	0	0	0	0	0	0	0	0	0	0	0	0	0	0	0	0	0	0	0	0	0	0	0	0
460_Gobiidae	Rhinogobius giurinus	147	6	0	0	0	0	0	0	0	0	0	0	0	0	0	0	0	0	0	0	0	0	0	0	0	0	0	0	0	0	0	0	0	0	0	0	0	0	0	0	0	0	0	0	0	0	0	0
460_Gobiidae	Rhinogobius spp.	2962	31	0	0	0	0	0	0	0	0	0	0	0	0	0	0	0	0	0	0	0	0	0	0	0	0	0	0	0	0	0	0	0	0	0	0	0	0	0	0	0	0	0	0	0	0	0	0
460_Gobiidae	Sagamia geneionema	14181	129	0	11	0	0	0	0	29	83	0	0	20	51	21	0	0	0	162	0	57	0	27	373	97	13	0	0	0	0	16	351	0	159	51	0	31	0	0	0	0	77	50	0	0	88	0	123
460_Gobiidae	Sicyopterus japonicus	223	3	0	0	0	0	0	0	0	0	0	0	0	0	0	0	0	0	0	0	0	0	0	0	0	0	0	0	0	0	0	0	0	0	0	0	0	0	0	0	0	0	0	0	0	0	0	0
460_Gobiidae	Stenogobius sp TANEKAWA HAZE	35	1	0	0	0	0	0	0	0	0	0	0	0	0	0	0	0	0	0	0	0	0	0	0	0	0	0	0	0	0	0	0	0	0	0	0	0	0	0	0	0	0	0	0	0	0	0	0
460_Gobiidae	Stonogobiops xanthorhinica	166	6	0	0	0	0	0	0	0	0	0	0	0	0	0	0	0	0	0	0	0	0	0	0	0	0	0	0	0	0	0	0	0	0	0	0	0	0	0	0	0	0	0	0	0	0	0	0
460_Gobiidae	Taenioides cirratus	83	1	0	0	0	0	0	0	0	0	0	0	0	0	0	0	0	0	0	0	0	0	0	0	0	0	0	0	0	0	0	0	0	0	0	0	0	0	0	0	0	0	0	0	0	0	0	0
460_Gobiidae	Tridentiger bifasciatus	11	1	0	0	0	0	0	0	0	0	0	0	0	0	0	0	0	0	0	0	0	0	0	0	0	0	0	0	0	0	0	0	0	0	0	0	0	0	0	0	0	0	0	0	0	0	0	0
460_Gobiidae	Tridentiger obscurus	2028	22	0	0	0	0	0	0	0	0	0	0	0	0	0	0	0	0	0	0	0	0	0	0	0	0	0	0	0	0	0	0	0	0	0	0	0	0	0	0	0	0	0	0	0	0	0	0
460_Gobiidae	Tridentiger trigonocephalus	6914	61	192	0	0	0	0	0	19	50	0	0	350	892	0	0	0	0	0	0	0	0	0	147	173	0	0	0	0	0	0	0	0	0	82	0	0	0	0	0	0	0	0	0	0	310	129	0
460_Gobiidae	Trimma caesiura	49	1	0	0	0	0	0	0	0	0	0	0	0	0	0	0	0	0	0	0	0	0	0	0	0	0	0	0	0	0	0	0	0	0	0	0	0	0	0	0	0	0	0	0	0	0	0	0
460_Gobiidae	Valenciennea longipinnis	16	1	0	0	0	0	0	0	0	0	0	0	0	0	0	0	0	0	0	0	0	0	0	0	0	0	0	0	0	0	0	0	0	0	0	0	0	0	0	0	0	0	0	0	0	0	0	0
461_Microdesmidae	Gunnellichthys monostigma	71	1	0	0	0	0	0	0	0	0	0	0	0	0	0	0	0	0	0	0	0	0	0	0	0	0	0	0	0	0	0	0	0	0	0	0	0	0	0	0	0	0	0	0	0	0	0	0
462_Ptereleotridae	Parioglossus dotui	591	10	0	0	0	0	0	0	0	0	0	0	0	0	0	0	0	0	0	0	0	0	0	0	0	0	0	0	0	0	0	0	0	0	0	0	0	0	0	0	0	0	0	0	0	0	0	0
462_Ptereleotridae	Ptereleotris hanae	57	2	0	0	0	0	0	0	0	0	0	0	0	0	0	0	0	0	0	0	0	0	0	0	0	0	0	0	0	0	0	0	0	18	0	0	0	0	0	0	0	0	0	0	0	0	0	0
462_Ptereleotridae	Ptereleotris hanae	33	1	0	0	0	0	0	0	0	0	0	0	0	0	0	0	0	0	0	0	0	0	0	0	0	0	0	0	0	0	0	0	0	0	0	0	0	0	0	0	0	0	0	0	0	0	0	0
462_Ptereleotridae	Ptereleotris microlepis	14	1	0	0	0	0	0	0	0	0	0	0	0	0	0	0	0	0	0	0	0	0	0	0	0	0	0	0	0	0	0	0	0	0	0	0	0	0	0	0	0	0	0	0	0	0	0	0
465_Ephippidae	Platax orbicularis	157	2	0	0	0	0	0	0	0	0	0	0	0	0	0	0	0	0	0	0	0	0	0	0	0	0	0	0	0	0	0	0	0	0	0	0	0	0	0	0	0	0	0	0	0	0	0	0
465_Ephippidae	Platax teira	13799	13	0	0	0	0	0	0	0	0	0	0	0	0	0	0	0	0	0	0	0	0	0	0	0	0	0	0	0	0	0	0	0	0	0	0	0	0	0	0	0	0	0	0	0	0	0	0
465_Ephippidae	Platax teira gotu1	50	1	0	0	0	0	0	0	0	0	0	0	0	0	0	0	0	0	0	0	0	0	0	0	0	0	0	0	0	0	0	0	0	0	0	0	0	0	0	0	0	0	0	0	0	0	0	0
465_Ephippidae	Platax teira gotu2	24	1	0	0	0	0	0	0	0	0	0	0	0	0	0	0	0	0	0	0	0	0	0	0	0	0	0	0	0	0	0	0	0	0	0	0	0	0	0	0	0	0	0	0	0	0	0	0
467_Siganidae	Siganus fuscescens	601049	407	94	249	2993	7377	2860	6318	6802	1050	4917	2951	22	0	602	1869	1797	1742	2199	5788	7950	124	1810	2159	0	1267	10213	2089	4882	5753	7960	5624	2322	6656	3654	0	1414	5705	1173	4136	6130	10132	3649	2671	1816	2283	2090	263
467_Siganidae	Siganus spinus	830	12	0	0	0	0	0	0	0	0	0	0	0	0	0	0	0	0	0	0	0	0	0	0	0	0	0	0	0	0	0	0	0	0	0	0	0	0	0	0	0	0	0	0	0	0	0	0
470_Acanthuridae	Acanthurus dussumieri	765	13	0	0	0	0	35	0	0	0	0	0	0	0	0	0	0	0	0	0	0	0	0	0	0	0	24	0	0	0	0	0	0	0	0	0	0	0	0	0	0	0	0	0	0	0	0	0
470_Acanthuridae	Acanthurus gahhm	209	3	0	0	0	0	0	0	0	0	0	0	0	0	0	0	0	0	0	0	0	0	0	0	0	0	0	107	0	0	0	0	0	0	0	0	0	0	0	0	0	0	0	0	0	0	0	14
470_Acanthuridae	Acanthurus maculiceps	12	1	0	0	0	0	0	0	0	0	0	0	0	0	0	0	0	0	0	0	0	0	0	0	0	0	0	0	0	0	0	0	0	0	0	0	0	0	0	0	0	0	0	0	0	0	0	0
470_Acanthuridae	Acanthurus mata	102	1	0	0	0	0	0	0	0	0	0	0	0	0	0	0	0	0	0	0	0	0	0	0	0	0	0	0	0	0	0	0	0	0	0	0	0	0	0	0	0	0	0	0	0	0	0	0
470_Acanthuridae	Acanthurus nigrofuscus	54	1	0	0	0	0	0	0	0	0	0	0	0	0	0	0	0	0	0	0	0	0	0	0	0	0	0	0	0	0	0	0	0	0	0	0	0	0	0	0	0	0	0	0	0	0	0	0
470_Acanthuridae	Acanthurus olivaceus	21	1	0	0	0	0	0	0	0	0	0	0	0	0	0	0	0	0	0	0	0	0	0	0	0	0	0	0	0	0	0	0	0	0	0	0	0	0	0	0	0	0	0	0	0	0	0	0
470_Acanthuridae	Acanthurus triostegus	660	11	0	0	0	0	0	0	0	0	0	0	0	0	0	0	0	0	0	0	0	0	0	0	0	13	0	0	0	0	0	0	0	0	0	0	0	0	0	0	0	0	0	0	0	0	0	158
470_Acanthuridae	Ctenochaetus striatus	47	2	0	0	0	0	0	0	0	0	0	0	0	0	0	0	0	0	0	0	0	0	0	0	0	0	0	0	0	0	0	0	0	0	0	0	0	0	0	0	0	0	0	0	0	0	0	0
470_Acanthuridae	Naso tuberosus	29	1	0	0	0	0	0	0	0	0	0	0	0	0	0	0	0	0	0	0	0	0	0	0	0	0	0	0	0	0	0	0	0	0	0	0	0	0	0	0	0	0	0	0	0	0	0	0
470_Acanthuridae	Naso unicornis	532	4	0	0	0	0	0	0	0	0	0	0	0	0	0	0	0	0	0	0	0	0	0	0	0	0	0	0	0	0	0	0	0	0	0	0	0	0	0	0	0	0	0	0	0	0	0	0
470_Acanthuridae	Naso vlamingii	18	1	0	0	0	0	0	0	0	0	0	0	0	0	0	0	0	0	0	0	0	0	0	0	0	0	0	0	0	0	0	0	0	0	0	0	0	0	0	0	0	0	0	0	0	0	0	0
470_Acanthuridae	Prionurus scalprum	101318	250	501	681	882	1935	618	948	464	0	662	14	39	327	966	358	1460	1481	949	699	626	436	243	58	699	753	256	1250	1986	547	641	375	2478	862	318	0	616	347	1625	2143	849	535	628	215	33	155	141	408
470_Acanthuridae	Zebrasoma veliferum	19	1	0	0	0	0	0	0	0	0	0	0	0	0	0	0	0	0	0	0	0	0	0	0	0	0	0	0	0	0	0	0	0	0	0	0	0	0	0	0	0	0	0	0	0	0	0	0
472_Sphyraenidae	Sphyraena japonica	2294	21	0	0	0	0	0	0	0	0	0	66	0	0	0	0	0	0	0	0	16	0	0	0	0	0	0	0	0	0	0	0	0	0	0	0	0	0	0	0	0	0	0	0	0	0	0	0
472_Sphyraenidae	Sphyraena obtusata	794	14	0	0	0	0	0	0	0	79	0	0	0	0	0	0	0	0	0	0	0	48	0	0	0	0	12	0	0	0	0	28	0	0	0	0	0	0	0	0	0	0	0	0	0	0	0	0
472_Sphyraenidae	Sphyraena obtusata gotu1	65	2	0	0	0	0	0	0	0	0	41	0	0	0	0	0	0	0	0	0	0	0	0	0	0	0	24	0	0	0	0	0	0	0	0	0	0	0	0	0	0	0	0	0	0	0	0	0
472_Sphyraenidae	Sphyraena pinguis Genetype1	6961	61	0	0	0	0	0	0	0	0	0	0	88	0	0	0	0	0	0	0	276	74	0	21	0	0	0	0	0	0	0	455	0	98	0	0	0	0	0	0	0	0	0	0	465	0	0	0
472_Sphyraenidae	Sphyraena pinguis Genetype2	130	2	0	0	0	0	0	0	0	0	0	0	0	0	0	0	0	0	0	0	0	0	0	0	0	0	0	0	0	0	0	0	0	0	0	0	0	0	0	0	0	0	0	0	0	0	0	0
475_Scombridae	Acanthocybium solandri	26	1	0	0	0	0	0	0	0	0	0	0	0	0	0	0	0	0	0	0	0	0	0	0	0	0	0	0	0	0	0	0	0	0	0	0	0	0	0	0	0	0	0	0	0	0	0	0
475_Scombridae	Auxis rochei	10086	31	0	0	0	0	0	0	0	38	0	28	0	0	0	0	0	0	0	80	0	0	0	0	0	0	0	0	0	0	0	0	0	211	0	0	0	0	0	0	0	0	0	0	0	0	0	0
475_Scombridae	Euthynnus affinis	353	8	0	0	0	0	0	0	0	0	0	0	0	0	0	0	0	0	0	0	0	0	0	0	0	0	0	0	0	0	0	0	0	0	0	0	0	0	0	53	0	0	0	0	0	0	0	0
475_Scombridae	Scomber spp.	100318	231	227	0	0	0	47	0	0	0	0	15	0	93	0	116	20	0	0	1765	0	0	101	0	652	13	0	54	37	0	95	0	239	201	0	0	0	0	0	0	22	0	0	0	59	0	370	0
475_Scombridae	Scomberomorus niphonius	1702	15	0	0	0	0	0	0	0	0	0	0	0	0	0	0	0	0	0	0	0	0	0	0	0	0	0	0	0	0	0	0	0	0	0	0	0	0	0	0	0	0	0	0	0	0	0	0
479_Centrolophidae	Psenopsis anomala	16	1	0	0	0	0	0	0	0	0	0	0	0	0	0	0	0	0	0	0	0	0	0	0	0	0	0	0	0	0	0	0	0	0	0	0	0	0	0	0	0	0	0	0	0	0	0	0
479_Centrolophidae	Psenopsis shojimai	97	2	0	0	0	0	0	0	0	0	0	0	0	0	0	0	0	0	0	0	0	0	0	0	0	0	0	0	0	0	0	0	0	0	0	0	0	0	0	0	0	0	0	0	0	0	0	0
492_Paralichthyidae	Paralichthys olivaceus	17059	163	0	0	0	0	0	0	0	47	0	0	229	18	190	0	0	0	0	0	24	0	0	80	0	29	0	0	0	15	0	34	0	69	75	0	103	0	0	0	0	0	14	0	0	0	0	47
492_Paralichthyidae	Pseudorhombus cinnamoneus	13	1	0	0	0	0	0	0	0	0	0	0	0	0	0	0	0	0	0	0	0	0	0	0	0	0	0	0	0	0	0	0	0	0	0	0	0	0	0	0	0	0	0	0	0	0	0	0
492_Paralichthyidae	Pseudorhombus pentophthalmus	17	1	0	0	0	0	0	0	0	0	0	0	0	0	0	0	0	0	0	0	0	0	0	0	0	0	0	0	0	0	0	0	0	0	0	0	0	0	0	0	0	0	0	0	0	0	0	0
493_Pleuronectidae	Eopsetta grigorjewi	401	1	0	0	0	0	0	0	0	0	0	0	0	0	0	0	0	0	0	0	0	0	0	0	0	0	0	0	0	0	0	0	0	0	0	0	0	0	0	0	0	0	0	0	0	0	0	0
493_Pleuronectidae	Kareius bicoloratus	995	8	0	0	0	0	0	0	0	0	0	0	0	0	0	0	0	0	0	0	0	0	0	0	0	0	0	0	0	0	0	0	0	0	0	0	0	0	0	0	0	0	0	0	0	0	0	0
493_Pleuronectidae	Pleuronichthys cornutus	537	6	0	0	0	0	0	0	0	0	0	0	0	0	0	0	0	0	0	0	0	0	0	0	0	0	0	0	0	0	0	0	0	0	0	0	0	0	0	0	0	0	0	0	0	0	0	0
493_Pleuronectidae	Pleuronichthys japonicus	564	4	0	0	0	0	0	0	0	0	0	0	0	0	0	0	0	0	0	0	0	0	0	0	0	0	0	0	0	0	0	0	0	0	0	0	0	0	0	0	0	0	0	0	0	0	0	0
493_Pleuronectidae	Pseudopleuronectes yokohamae	434	8	0	0	0	0	0	0	0	0	0	0	0	0	0	0	0	0	0	0	0	0	0	0	0	0	0	0	0	0	0	0	0	0	53	0	0	0	0	0	0	0	0	0	0	59	0	0
493_Pleuronectidae	Reinhardtius hippoglossoides	26	1	0	0	0	0	0	0	0	0	0	0	0	0	0	0	0	0	0	0	0	0	0	0	0	0	0	0	0	0	0	0	0	0	0	0	0	0	0	0	0	0	0	0	0	0	0	0
494_Bothidae	Bothus pantherinus	48	1	0	0	0	0	0	0	0	0	0	0	0	0	0	0	0	0	0	0	0	0	0	0	0	0	0	0	0	0	0	0	0	0	0	0	0	0	0	0	0	0	0	0	0	0	0	0
501_Soleidae	Aseraggodes kobensis	347	7	0	0	0	0	0	0	0	0	0	0	0	0	0	0	0	0	0	0	0	0	0	0	0	0	0	0	0	0	0	0	0	0	0	0	0	0	0	0	0	0	0	0	0	0	0	0
501_Soleidae	Heteromycteris japonicus	316	15	0	0	0	0	0	0	0	0	0	0	23	0	0	0	0	0	0	0	0	0	0	12	0	0	0	0	0	0	0	0	0	0	0	0	0	0	0	0	0	0	0	0	0	45	0	0
501_Soleidae	Pseudaesopia japonica	81	1	0	0	0	0	0	0	0	0	0	0	0	0	0	0	0	0	0	0	0	0	0	0	0	0	0	0	0	0	0	0	0	0	0	0	0	0	0	0	0	0	0	0	0	0	0	0
501_Soleidae	Zebrias quagga	469	9	0	0	0	0	0	0	0	0	0	0	0	0	0	0	0	0	0	0	19	0	0	0	0	0	0	0	0	0	0	0	0	0	0	0	0	0	0	0	0	0	0	0	0	0	0	0
502_Cynoglossidae	Cynoglossus interruptus	50	1	0	0	0	0	0	0	0	0	0	0	0	0	0	0	0	0	0	0	0	0	0	0	0	0	0	0	0	0	0	0	0	0	0	0	0	0	0	0	0	0	0	0	0	0	0	0
502_Cynoglossidae	Cynoglossus joyneri	12	1	0	0	0	0	0	0	0	0	0	0	0	0	0	0	0	0	0	0	0	0	0	0	0	0	0	0	0	0	0	0	0	0	0	0	0	0	0	0	0	0	0	0	0	0	0	0
502_Cynoglossidae	Cynoglossus puncticeps	133	1	0	0	0	0	0	0	0	0	0	0	0	0	0	0	0	0	0	0	0	0	0	0	0	0	0	0	0	0	0	0	0	0	0	0	0	0	0	0	0	0	0	0	0	0	0	0
502_Cynoglossidae	Paraplagusia japonica	273	8	0	0	0	0	0	0	0	0	0	0	14	0	0	0	0	0	0	0	0	0	0	0	0	0	0	0	0	0	0	0	0	0	0	0	0	0	0	0	0	0	0	0	0	0	0	0
502_Cynoglossidae	Symphurus cf microrhynchus	44	2	0	0	0	0	0	0	0	0	0	0	0	0	0	0	0	0	0	0	0	0	0	0	0	0	0	0	0	0	0	0	0	0	0	0	0	0	0	0	0	0	0	0	0	0	0	32
504_Triacanthidae	Triacanthus biaculeatus	6052	33	0	0	0	0	0	0	0	0	0	0	18	0	0	0	0	0	0	16	0	0	0	0	0	0	0	0	0	0	0	0	115	0	9	0	0	0	0	0	0	0	0	0	0	79	0	0
505_Balistidae	Canthidermis maculata	716	4	0	0	0	0	0	0	0	0	0	0	0	0	0	0	0	0	0	0	0	0	0	0	0	0	0	0	0	0	0	0	0	0	0	0	0	0	0	0	0	0	0	0	0	0	0	0
505_Balistidae	Melichthys niger	50	1	0	0	0	0	0	0	0	0	0	0	0	0	0	0	0	0	0	0	0	0	0	0	0	0	0	0	0	0	0	0	0	0	0	0	0	0	0	0	0	0	0	0	0	0	0	0
505_Balistidae	Rhinecanthus rectangulus	97	1	0	0	0	0	0	0	0	0	0	0	0	0	0	0	0	0	0	0	0	0	0	0	0	0	0	0	0	0	0	0	0	0	0	0	0	0	0	0	0	0	0	0	0	0	0	0
505_Balistidae	Xanthichthys ringens	15	1	0	0	0	0	0	0	0	0	0	0	0	0	0	0	0	0	0	0	0	0	0	0	0	0	0	0	0	0	0	0	0	0	0	0	0	0	0	0	0	0	0	0	0	0	0	0
506_Monacanthidae	Aluterus scriptus	16	1	0	0	0	0	0	0	0	0	0	0	0	0	0	0	0	0	0	0	0	0	0	0	0	0	0	0	0	0	0	0	0	0	0	0	0	0	0	0	0	0	0	0	0	0	0	0
506_Monacanthidae	Brachaluteres ulvarum	249	4	0	0	0	0	0	0	0	18	0	0	0	0	0	0	0	0	0	0	0	0	87	0	0	0	0	0	0	0	0	0	0	0	0	0	0	0	0	0	0	0	107	0	0	0	0	0
506_Monacanthidae	Cantherhines pullus	48	1	0	0	0	0	0	0	0	0	0	0	0	0	0	0	0	0	0	0	0	0	0	0	0	0	0	0	0	0	0	0	0	0	0	0	0	0	0	0	0	0	0	0	0	0	0	0
506_Monacanthidae	Paraluteres prionurus	114	1	0	0	0	0	0	0	0	0	0	0	0	0	0	0	0	0	0	0	0	0	0	0	0	0	0	0	0	0	0	0	0	0	0	0	0	0	0	0	0	0	0	0	0	0	0	0
506_Monacanthidae	Paramonacanthus choirocephalus	124	2	0	0	0	0	0	0	0	0	0	0	0	0	0	0	0	0	0	0	0	0	0	0	0	0	0	0	0	0	0	0	0	0	0	0	0	0	0	0	0	0	0	0	0	0	0	0
506_Monacanthidae	Paramonacanthus pusillus	599	3	0	0	0	0	0	0	0	0	0	0	0	0	0	0	0	0	0	0	0	0	0	0	0	0	0	0	0	0	0	0	0	0	0	0	0	0	0	0	0	0	0	0	0	0	0	0
506_Monacanthidae	Rudarius ercodes	2274	31	0	16	0	0	0	0	0	0	0	0	101	0	20	0	0	0	0	0	25	0	0	298	0	43	0	0	0	0	0	0	0	30	14	0	0	0	0	0	0	0	199	0	0	28	0	0
506_Monacanthidae	Stephanolepis cirrhifer	8233	108	0	18	0	32	0	0	83	68	182	1274	316	0	20	0	0	0	22	16	51	77	266	119	0	0	24	23	0	0	9	0	64	572	62	0	0	0	0	0	0	12	85	0	405	20	0	0
506_Monacanthidae	Thamnaconus modestus	1475	21	0	0	0	0	0	0	0	0	0	0	0	0	0	0	0	0	0	0	0	0	98	0	0	0	0	0	0	0	0	0	0	94	0	0	0	0	0	0	0	0	0	0	0	0	0	0
507_Ostraciidae	Lactoria cornuta	97	1	0	0	0	0	0	0	0	0	0	0	0	0	0	0	0	0	0	0	0	0	0	0	0	0	0	0	0	0	0	0	0	0	0	0	0	0	0	0	0	0	0	0	0	0	0	0
507_Ostraciidae	Lactoria diaphana	1000	4	0	0	0	0	0	0	0	0	0	0	0	0	0	0	0	0	0	0	0	0	0	0	0	0	0	0	0	0	0	0	0	0	0	0	0	0	0	0	0	0	0	0	0	0	0	0
507_Ostraciidae	Ostracion immaculatus	27258	187	56	66	0	73	0	0	76	66	0	0	0	0	0	0	0	0	0	145	0	0	293	0	0	26	110	860	0	0	0	0	134	248	0	0	0	259	0	0	0	0	0	0	76	0	0	0
507_Ostraciidae	Tetrosomus concatenatus gotu1	5427	6	0	0	0	0	0	0	0	0	0	0	0	0	0	0	0	0	0	0	0	0	0	0	0	0	0	0	0	0	0	0	0	0	0	0	0	0	0	0	0	0	0	0	0	0	0	0
509_Tetraodontidae	Arothron hispidus	314	4	0	0	0	0	0	0	0	0	0	0	0	0	0	0	0	0	0	0	0	0	0	0	0	0	0	0	0	0	0	0	0	0	0	0	0	0	0	0	0	0	0	0	0	0	0	0
509_Tetraodontidae	Canthigaster janthinoptera	111	2	0	0	0	0	0	0	0	0	0	0	0	0	0	0	0	0	0	0	0	0	0	0	0	0	0	0	0	0	0	0	0	0	0	0	0	0	0	0	0	0	0	0	0	0	0	0
509_Tetraodontidae	Canthigaster rivulata	23474	221	138	168	129	607	0	0	62	173	0	54	0	0	54	22	0	0	14	17	0	0	111	0	0	81	66	0	0	0	14	0	0	119	0	0	114	66	0	0	39	0	404	202	0	0	0	0
509_Tetraodontidae	Canthigaster rostrata	155	3	0	0	0	0	0	0	0	0	0	0	0	0	0	0	0	0	0	0	0	0	0	0	0	0	0	0	0	0	0	0	0	0	0	0	0	0	0	0	0	0	0	0	0	0	0	0
509_Tetraodontidae	Lagocephalus gloveri	132	2	0	0	0	0	0	0	0	0	0	0	0	0	0	0	0	0	0	0	0	0	0	0	0	0	0	0	0	0	0	0	0	0	0	0	0	0	0	0	0	0	0	0	0	0	0	0
509_Tetraodontidae	Lagocephalus lagocephalus	20	1	0	0	0	0	0	0	0	0	0	0	0	0	0	0	0	0	0	0	0	0	0	0	0	0	0	0	0	0	0	0	0	0	0	0	0	0	0	0	0	0	0	0	0	0	0	0
509_Tetraodontidae	Lagocephalus sceleratus	765	1	0	0	0	0	0	0	0	0	0	0	0	0	0	0	0	0	0	0	0	0	0	0	0	0	0	0	0	0	0	0	0	0	0	0	0	0	0	0	0	0	0	0	0	0	0	0
509_Tetraodontidae	Lagocephalus spadiceus	4469	22	0	0	0	0	0	0	0	0	0	0	81	0	0	0	0	0	0	0	0	0	0	0	0	0	0	0	0	0	0	0	0	0	0	0	0	0	0	0	0	0	0	0	0	0	0	0
509_Tetraodontidae	Takifugu fasciatus	61716	87	123	0	0	0	0	0	0	0	0	0	0	0	0	0	0	0	0	0	0	0	0	0	160	0	0	0	16	0	0	0	0	0	0	0	0	0	0	0	0	0	0	0	0	0	0	0
509_Tetraodontidae	Takifugu niphobles	969734	525	962	3446	1302	0	0	92	1827	258	867	335	5121	2477	3552	877	1000	203	464	1207	1390	430	1123	3043	1914	4620	46	815	161	370	189	177	521	98	2540	3860	3444	99	3064	0	898	185	2305	0	277	3351	2260	3042
509_Tetraodontidae	Takifugu orbimaculatus	97	1	0	0	0	0	0	0	0	0	0	0	0	0	0	0	0	0	0	0	0	0	0	0	0	0	0	0	0	0	0	0	0	0	0	0	0	0	0	0	0	0	0	0	0	0	0	0
509_Tetraodontidae	Takifugu rubripes	467	5	0	0	0	0	0	0	0	0	0	0	0	0	0	0	0	0	0	0	0	0	0	0	0	0	0	0	0	0	0	0	0	0	0	0	0	0	0	0	0	0	0	0	0	0	0	0
509_Tetraodontidae	Takifugu stictonotus	62218	96	244	0	0	0	0	0	0	0	175	0	0	0	0	0	0	0	0	0	832	0	0	994	273	0	0	0	0	0	106	757	0	0	668	505	0	0	0	142	57	28	1109	0	0	233	0	0
510_Diodontidae	Chilomycterus reticulatus	154	4	0	0	0	0	0	0	0	0	0	0	0	0	0	0	0	0	0	0	0	0	0	0	0	0	0	0	0	0	0	0	0	0	0	0	0	0	0	0	0	0	0	0	0	0	0	0
510_Diodontidae	Diodon holocanthus	930	3	0	0	0	0	0	0	0	0	0	0	0	0	0	0	0	0	0	0	0	0	0	0	0	0	0	0	0	0	0	0	0	0	0	0	0	0	0	0	0	0	0	0	0	0	0	0
511_Molidae	Mola mola	76	2	0	0	0	0	0	0	0	0	0	0	0	0	0	0	0	0	0	0	0	0	0	0	0	0	0	0	0	0	0	0	0	0	0	0	0	0	0	0	0	0	0	0	0	0	0	0
[truncated: 504 more columns]

## Sheet: supplementary file 1b
Supplementary file 1b. A faunal inventory of the coastal marine fishes of Chiba prefecture compiled from museum collections and literature surveys. Museum acronyms are Natural History Museum and Institute, Chiba (CBM) and its coastal branch (CHMH), National Museum of Nature and Science, Tokyo (NSMT), Kanagawa Prefectural Museum of Natural History (KPM), and Yokosuka City Museum (YCM). All referen…
No.	Order	Family	Genus	Species	CBM	CBM (CNMH)	NSMT	KPM	YCM	Museum collections	Nakabo (2013)	Shitamitsu et al. (2019)	Aoki et al. (2016)	Kohno et al. (2011)	Miya et al. (1994a)	Miya et al. (1994b)	Miya et al. (1995)	Hagiwara et al. (2016)	Literature surveys	Museum collections + Literature
	38	193	946	2877	509	243	346	395	75	686	678	295	49	618	122	135	149	401	869	948
1	Perciformes	364_Carangidae	Trachurus	Trachurus_japonicus	✓	✓	✓	✓	✓	5	✓	✓	✓	✓	✓	✓	✓	✓	8	13
2	Perciformes	399_Teraponidae	Terapon	Terapon_jarbua	✓	✓	✓	✓	✓	5	✓	✓	✓	✓	✓	✓	✓	✓	8	13
3	Carcharhiniformes	027_Triakidae	Triakis	Triakis_scyllium	✓	✓		✓	✓	4	✓	✓	✓	✓	✓	✓	✓	✓	8	12
4	Clupeiformes	095_Engraulidae	Engraulis	Engraulis_japonicus	✓	✓	✓	✓		4	✓	✓	✓	✓	✓	✓	✓	✓	8	12
5	Perciformes	310_Triglidae	Chelidonichthys	Chelidonichthys_spinosus	✓	✓	✓	✓		4	✓	✓	✓	✓	✓	✓	✓	✓	8	12
6	Perciformes	354_Sillaginidae	Sillago	Sillago_japonica	✓	✓	✓	✓		4	✓	✓	✓	✓	✓	✓	✓	✓	8	12
7	Perciformes	374_Haemulidae	Parapristipoma	Parapristipoma_trilineatum	✓	✓	✓	✓	✓	5	✓	✓		✓	✓	✓	✓	✓	7	12
8	Perciformes	381_Sciaenidae	Miichthys	Nibea_mitsukurii	✓	✓	✓	✓	✓	5	✓	✓	✓	✓	✓	✓	✓		7	12
9	Perciformes	391_Kyphosidae	Microcanthus	Microcanthus_strigatus	✓	✓	✓	✓	✓	5	✓	✓		✓	✓	✓	✓	✓	7	12
10	Perciformes	401_Oplegnathidae	Oplegnathus	Oplegnathus_fasciatus	✓	✓	✓	✓		4	✓	✓	✓	✓	✓	✓	✓	✓	8	12
11	Pleuronectiformes	502_Cynoglossidae	Paraplagusia	Paraplagusia_japonica	✓	✓	✓	✓		4	✓	✓	✓	✓	✓	✓	✓	✓	8	12
12	Tetraodontiformes	509_Tetraodontidae	Canthigaster	Canthigaster_rivulata	✓	✓	✓	✓	✓	5	✓	✓		✓	✓	✓	✓	✓	7	12
13	Mugiliformes	245_Mugilidae	Mugil	Mugil_cephalus_cephalus	✓	✓	✓	✓	✓	5	✓	✓	✓	✓			✓	✓	6	11
14	Perciformes	304_Scorpaenidae	Sebastes	Sebastes_inermis	✓	✓	✓	✓	✓	5	✓	✓		✓	✓	✓		✓	6	11
15	Perciformes	313_Platycephalidae	Platycephalus	Platycephalus_sp_2	✓	✓	✓	✓		4	✓	✓		✓	✓	✓	✓	✓	7	11
16	Perciformes	332_Moronidae	Lateolabrax	Lateolabrax_japonicus	✓	✓	✓	✓		4	✓		✓	✓	✓	✓	✓	✓	7	11
17	Perciformes	352_Apogonidae	Ostorhinchus	Ostorhinchus_semilineatus	✓	✓	✓	✓	✓	5	✓	✓		✓	✓	✓		✓	6	11
18	Perciformes	358_Scombropidae	Scombrops	Scombrops_boops	✓	✓	✓	✓		4	✓	✓		✓	✓	✓	✓	✓	7	11
19	Perciformes	364_Carangidae	Caranx	Caranx_sexfasciatus	✓	✓	✓	✓		4	✓	✓	✓	✓	✓	✓		✓	7	11
20	Perciformes	364_Carangidae	Seriola	Seriola_quinqueradiata	✓	✓	✓	✓		4	✓	✓		✓	✓	✓	✓	✓	7	11
21	Perciformes	378_Sparidae	Acanthopagrus	Acanthopagrus_schlegeli	✓		✓	✓	✓	4	✓	✓	✓	✓	✓		✓	✓	7	11
22	Perciformes	383_Pempheridae	Pempheris	Pempheris_schwenkii	✓	✓	✓	✓	✓	5	✓	✓		✓	✓	✓		✓	6	11
23	Perciformes	391_Kyphosidae	Girella	Girella_punctata	✓	✓	✓	✓	✓	5	✓	✓		✓	✓	✓		✓	6	11
24	Perciformes	393_Chaetodontidae	Chaetodon	Chaetodon_auripes	✓	✓	✓	✓	✓	5	✓	✓		✓	✓	✓		✓	6	11
25	Perciformes	405_Cheilodactylidae	Cheilodactylus	Cheilodactylus_zonatus	✓	✓	✓	✓		4	✓	✓		✓	✓	✓	✓	✓	7	11
26	Perciformes	411_Pomacentridae	Abudefduf	Abudefduf_vaigiensis	✓	✓	✓	✓	✓	5	✓	✓		✓	✓	✓		✓	6	11
27	Perciformes	467_Siganidae	Siganus	Siganus_fuscescens	✓	✓	✓	✓		4	✓	✓		✓	✓	✓	✓	✓	7	11
28	Perciformes	475_Scombridae	Scomber	Scomber_japonicus	✓	✓	✓	✓		4	✓	✓	✓	✓	✓	✓	✓		7	11
29	Pleuronectiformes	492_Paralichthyidae	Paralichthys	Paralichthys_olivaceus	✓	✓	✓	✓		4	✓	✓	✓	✓	✓	✓		✓	7	11
30	Tetraodontiformes	506_Monacanthidae	Stephanolepis	Stephanolepis_cirrhifer	✓	✓	✓	✓		4	✓	✓	✓	✓		✓	✓	✓	7	11
31	Tetraodontiformes	506_Monacanthidae	Thamnaconus	Thamnaconus_modestus	✓	✓	✓	✓		4	✓	✓		✓	✓	✓	✓	✓	7	11
32	Tetraodontiformes	509_Tetraodontidae	Takifugu	Takifugu_pardalis	✓	✓	✓	✓		4	✓	✓		✓	✓	✓	✓	✓	7	11
33	Myliobatiformes	055_Dasyatidae	Dasyatis	Dasyatis_akajei	✓	✓		✓		3	✓		✓	✓	✓	✓	✓	✓	7	10
34	Anguilliformes	079_Muraenidae	Gymnothorax	Gymnothorax_kidako	✓	✓	✓	✓		4	✓	✓		✓	✓	✓		✓	6	10
35	Clupeiformes	097_Clupeidae	Sardinops	Sardinops_melanostictus	✓	✓	✓	✓		4	✓			✓	✓	✓	✓	✓	6	10
36	Siluriforme	151_Plotosidae	Plotosus	Plotosus_japonicus	✓	✓	✓	✓		4	✓	✓	✓	✓	✓			✓	6	10
37	Aulopiformes	187_Synodontidae	Saurida	Saurida_macrolepis	✓	✓	✓	✓		4	✓			✓	✓	✓	✓	✓	6	10
38	Gasterosteiformes	297_Fistulariidae	Fistularia	Fistularia_commersonii	✓	✓	✓	✓		4	✓	✓		✓	✓	✓		✓	6	10
39	Perciformes	304_Scorpaenidae	Hypodytes	Hypodytes_rubripinnis	✓	✓	✓	✓		4	✓	✓		✓		✓	✓	✓	6	10
40	Perciformes	313_Platycephalidae	Suggrundus	Suggrundus_meerdervoorti	✓	✓	✓	✓		4	✓			✓	✓	✓	✓	✓	6	10
41	Perciformes	320_Cottidae	Pseudoblennius	Pseudoblennius_cottoides	✓	✓	✓	✓	✓	5	✓	✓		✓	✓			✓	5	10
42	Perciformes	320_Cottidae	Pseudoblennius	Pseudoblennius_zonostigma	✓	✓	✓	✓	✓	5	✓	✓		✓	✓			✓	5	10
43	Perciformes	364_Carangidae	Kaiwarinus	Kaiwarinus_equula	✓	✓	✓	✓		4	✓			✓	✓	✓	✓	✓	6	10
44	Perciformes	364_Carangidae	Selar	Selar_crumenophthalmus	✓	✓	✓	✓		4	✓			✓	✓	✓	✓	✓	6	10
45	Perciformes	364_Carangidae	Seriola	Seriola_dumerili	✓	✓	✓	✓		4	✓	✓		✓	✓	✓		✓	6	10
46	Perciformes	377_Lethrinidae	Lethrinus	Lethrinus_genivittatus	✓	✓	✓	✓		4	✓	✓		✓	✓	✓		✓	6	10
47	Perciformes	378_Sparidae	Evynnis	Evynnis_tumifrons	✓	✓	✓	✓		4	✓			✓	✓	✓	✓	✓	6	10
48	Perciformes	378_Sparidae	Pagrus	Pagrus_major	✓	✓	✓	✓		4	✓			✓	✓	✓	✓	✓	6	10
49	Perciformes	382_Mullidae	Upeneus	Upeneus_japonicus	✓	✓	✓	✓		4	✓	✓		✓		✓	✓	✓	6	10
50	Perciformes	383_Pempheridae	Parapriacanthus	Parapriacanthus_ransonneti	✓	✓	✓	✓		4	✓	✓		✓	✓	✓		✓	6	10
51	Perciformes	401_Oplegnathidae	Oplegnathus	Oplegnathus_punctatus	✓	✓	✓	✓		4	✓	✓		✓	✓	✓		✓	6	10
52	Perciformes	405_Cheilodactylidae	Cheilodactylus	Cheilodactylus_zebra	✓	✓	✓	✓		4	✓	✓		✓	✓	✓		✓	6	10
53	Perciformes	410_Embiotocidae	Neoditrema	Neoditrema_ransonnetii	✓	✓	✓	✓		4	✓			✓	✓	✓	✓	✓	6	10
54	Perciformes	414_Scaridae	Calotomus	Calotomus_japonicus	✓	✓	✓	✓		4	✓	✓		✓	✓	✓		✓	6	10
55	Perciformes	419_Pholidae	Pholis	Pholis_nebulosa	✓	✓	✓	✓		4	✓	✓	✓	✓			✓	✓	6	10
56	Perciformes	447_Blenniidae	Petroscirtes	Petroscirtes_breviceps	✓	✓	✓	✓		4	✓	✓		✓	✓	✓		✓	6	10
57	Perciformes	453_Callionymidae	Repomucenus	Repomucenus_curvicornis	✓	✓	✓	✓		4	✓		✓	✓	✓	✓		✓	6	10
58	Perciformes	472_Sphyraenidae	Sphyraena	Sphyraena_pinguis	✓	✓	✓			3	✓		✓	✓	✓	✓	✓	✓	7	10
59	Pleuronectiformes	501_Soleidae	Heteromycteris	Heteromycteris_japonica	✓	✓	✓	✓		4	✓	✓	✓	✓	✓		✓		6	10
60	Pleuronectiformes	501_Soleidae	Zebrias	Zebrias_zebrinus	✓	✓	✓	✓		4	✓	✓		✓		✓	✓	✓	6	10
61	Tetraodontiformes	507_Ostraciidae	Lactoria	Lactoria_diaphana	✓	✓	✓	✓		4	✓	✓		✓	✓	✓		✓	6	10
62	Tetraodontiformes	509_Tetraodontidae	Takifugu	Takifugu_niphobles	✓	✓	✓	✓		4	✓	✓	✓	✓			✓	✓	6	10
63	Tetraodontiformes	509_Tetraodontidae	Takifugu	Takifugu_snyderi	✓	✓	✓	✓	✓	5	✓			✓	✓		✓	✓	5	10
64	Carcharhiniformes	027_Triakidae	Mustelus	Mustelus_manazo	✓	✓	✓	✓		4	✓			✓		✓	✓	✓	5	9
65	Myliobatiformes	058_Myliobatidae	Myliobatis	Myliobatis_tobijei	✓	✓		✓		3	✓	✓		✓	✓	✓	✓		6	9
66	Anguilliformes	081_Ophichthidae	Ophisurus	Ophisurus_macrorhynchos	✓	✓	✓			3	✓	✓		✓	✓	✓		✓	6	9
67	Anguilliformes	086_Congridae	Conger	Conger_japonicus	✓	✓		✓		3	✓	✓		✓	✓	✓		✓	6	9
68	Clupeiformes	097_Clupeidae	Spratelloides	Spratelloides_gracilis	✓	✓	✓	✓		4	✓	✓		✓	✓			✓	5	9
69	Aulopiformes	187_Synodontidae	Trachinocephalus	Trachinocephalus_myops	✓		✓	✓		3	✓	✓		✓	✓		✓	✓	6	9
70	Lophiiformes	228_Antennariidae	Antennarius	Antennarius_striatus	✓		✓	✓		3	✓	✓		✓		✓	✓	✓	6	9
71	Beryciformes	279_Monocentridae	Monocentris	Monocentris_japonica	✓	✓		✓		3	✓	✓		✓	✓	✓		✓	6	9
72	Zeiformes	288_Zeidae	Zeus	Zeus_faber	✓		✓	✓		3	✓			✓	✓	✓	✓	✓	6	9
73	Gasterosteiformes	295_Syngnathidae	Syngnathus	Syngnathus_schlegeli	✓	✓	✓	✓		4	✓	✓	✓	✓				✓	5	9
74	Perciformes	304_Scorpaenidae	Apistus	Apistus_carinatus	✓	✓	✓	✓		4	✓			✓		✓	✓	✓	5	9
75	Perciformes	304_Scorpaenidae	Pterois	Pterois_lunulata	✓	✓	✓			3	✓	✓		✓		✓	✓	✓	6	9
76	Perciformes	304_Scorpaenidae	Sebastiscus	Sebastiscus_marmoratus	✓	✓	✓	✓		4	✓	✓		✓			✓	✓	5	9
77	Perciformes	313_Platycephalidae	Onigocia	Onigocia_spinosa	✓	✓	✓	✓	✓	5	✓	✓		✓				✓	4	9
78	Perciformes	320_Cottidae	Ocynectes	Ocynectes_maschalis	✓	✓	✓	✓	✓	5	✓	✓		✓				✓	4	9
79	Perciformes	320_Cottidae	Pseudoblennius	Pseudoblennius_marmoratus	✓	✓	✓	✓	✓	5	✓	✓		✓				✓	4	9
80	Perciformes	320_Cottidae	Pseudoblennius	Pseudoblennius_percoides	✓	✓	✓	✓		4	✓	✓		✓	✓			✓	5	9
81	Perciformes	320_Cottidae	Vellitor	Vellitor_centropomus	✓	✓	✓	✓	✓	5	✓	✓		✓				✓	4	9
82	Perciformes	338_Serranidae	Epinephelus	Epinephelus_septemfasciatus	✓	✓	✓	✓		4	✓	✓		✓		✓		✓	5	9
83	Perciformes	352_Apogonidae	Ostorhinchus	Ostorhinchus_endekataenia	✓	✓	✓	✓		4	✓	✓		✓		✓		✓	5	9
84	Perciformes	361_Coryphaenidae	Coryphaena	Coryphaena_hippurus	✓	✓	✓	✓		4	✓			✓	✓	✓	✓		5	9
85	Perciformes	364_Carangidae	Decapterus	Decapterus_macrosoma	✓	✓	✓	✓		4	✓			✓	✓	✓	✓		5	9
86	Perciformes	374_Haemulidae	Diagramma	Diagramma_pictum	✓	✓	✓	✓		4	✓	✓		✓		✓		✓	5	9
87	Perciformes	374_Haemulidae	Plectorhinchus	Plectorhinchus_cinctus	✓	✓	✓			3	✓		✓	✓		✓	✓	✓	6	9
88	Perciformes	377_Lethrinidae	Gymnocranius	Gymnocranius_griseus	✓	✓	✓	✓		4	✓	✓		✓		✓		✓	5	9
89	Perciformes	382_Mullidae	Parupeneus	Parupeneus_chrysopleuron	✓	✓	✓	✓		4	✓	✓		✓			✓	✓	5	9
90	Perciformes	391_Kyphosidae	Girella	Girella_leonina	✓	✓	✓	✓	✓	5	✓	✓		✓				✓	4	9
91	Perciformes	391_Kyphosidae	Kyphosus	Kyphosus_vaigiensis	✓		✓	✓		3	✓	✓		✓	✓	✓		✓	6	9
92	Perciformes	391_Kyphosidae	Labracoglossa	Labracoglossa_argentiventris	✓	✓	✓	✓		4		✓		✓	✓	✓		✓	5	9
93	Perciformes	411_Pomacentridae	Chromis	Chromis_notatus	✓	✓	✓	✓	✓	5	✓	✓		✓				✓	4	9
94	Perciformes	412_Labridae	Parajulis	Parajulis_poecilopterus	✓		✓	✓		3	✓	✓		✓	✓	✓		✓	6	9
95	Perciformes	412_Labridae	Pseudolabrus	Pseudolabrus_eoethinus	✓		✓	✓		3	✓	✓		✓		✓	✓	✓	6	9
96	Perciformes	412_Labridae	Pseudolabrus	Pseudolabrus_sieboldi	✓	✓	✓	✓	✓	5	✓	✓		✓				✓	4	9
97	Perciformes	412_Labridae	Pteragogus	Pteragogus_aurigarius	✓	✓	✓	✓	✓	5	✓	✓		✓				✓	4	9
98	Perciformes	412_Labridae	Stethojulis	Stethojulis_interrupta_terina	✓	✓	✓	✓	✓	5	✓	✓		✓				✓	4	9
99	Perciformes	412_Labridae	Thalassoma	Thalassoma_cupido	✓	✓	✓	✓	✓	5	✓	✓		✓				✓	4	9
100	Perciformes	417_Stichaeidae	Dictyosoma	Dictyosoma_burgeri	✓	✓	✓	✓	✓	5	✓	✓		✓				✓	4	9
101	Perciformes	445_Tripterygiidae	Enneapterygius	Enneapterygius_etheostomus	✓	✓	✓	✓	✓	5	✓	✓		✓				✓	4	9
102	Perciformes	447_Blenniidae	Istiblennius	Istiblennius_enosimae	✓	✓	✓	✓	✓	5	✓	✓		✓				✓	4	9
103	Perciformes	452_Gobiesocidae	Aspasma	Aspasma_minima	✓	✓	✓	✓	✓	5	✓	✓		✓				✓	4	9
104	Perciformes	460_Gobiidae	Acanthogobius	Acanthogobius_flavimanus	✓		✓	✓	✓	4	✓		✓	✓			✓	✓	5	9
105	Perciformes	460_Gobiidae	Bathygobius	Bathygobius_fuscus	✓	✓	✓	✓	✓	5	✓	✓		✓				✓	4	9
106	Perciformes	460_Gobiidae	Chaenogobius	Chaenogobius_gulosus	✓	✓	✓	✓		4	✓	✓	✓	✓				✓	5	9
107	Perciformes	460_Gobiidae	Istigobius	Istigobius_campbelli	✓	✓	✓	✓	✓	5	✓	✓		✓				✓	4	9
108	Perciformes	460_Gobiidae	Pterogobius	Pterogobius_elapoides	✓	✓	✓	✓	✓	5	✓	✓		✓				✓	4	9
109	Perciformes	460_Gobiidae	Tridentiger	Tridentiger_trigonocephalus	✓	✓	✓	✓	✓	5	✓	✓		✓				✓	4	9
110	Perciformes	470_Acanthuridae	Prionurus	Prionurus_scalprum	✓	✓	✓	✓		4	✓	✓		✓	✓	✓			5	9
111	Pleuronectiformes	492_Paralichthyidae	Pseudorhombus	Pseudorhombus_pentophthalmus	✓		✓	✓		3	✓			✓	✓	✓	✓	✓	6	9
112	Pleuronectiformes	492_Paralichthyidae	Tarphops	Tarphops_oligolepis	✓		✓			2	✓	✓	✓	✓	✓		✓	✓	7	9
113	Tetraodontiformes	506_Monacanthidae	Aluterus	Aluterus_monoceros	✓	✓	✓	✓		4	✓			✓	✓	✓		✓	5	9
114	Tetraodontiformes	506_Monacanthidae	Aluterus	Aluterus_scriptus	✓	✓	✓	✓		4	✓	✓		✓	✓	✓			5	9
115	Tetraodontiformes	507_Ostraciidae	Lactoria	Lactoria_fornasini	✓	✓	✓	✓		4	✓	✓		✓		✓		✓	5	9
116	Tetraodontiformes	507_Ostraciidae	Ostracion	Ostracion_immaculatus	✓	✓	✓			3	✓	✓		✓	✓	✓		✓	6	9
117	Tetraodontiformes	509_Tetraodontidae	Lagocephalus	Lagocephalus_spadiceus	✓	✓	✓	✓		4	✓			✓	✓	✓	✓		5	9
118	Tetraodontiformes	509_Tetraodontidae	Takifugu	Takifugu_chrysops	✓	✓	✓	✓		4	✓	✓		✓	✓	✓			5	9
119	Tetraodontiformes	510_Diodontidae	Diodon	Diodon_holocanthus	✓	✓		✓		3	✓	✓		✓	✓	✓		✓	6	9
120	Clupeiformes	097_Clupeidae	Etrumeus	Etrumeus_teres	✓	✓	✓			3	✓			✓	✓	✓	✓		5	8
121	Clupeiformes	097_Clupeidae	Konosirus	Konosirus_punctatus	✓	✓	✓			3	✓		✓	✓			✓	✓	5	8
122	Lophiiformes	228_Antennariidae	Histrio	Histrio_histrio	✓	✓	✓	✓		4	✓	✓		✓		✓			4	8
123	Gasterosteiformes	295_Syngnathidae	Hippocampus	Hippocampus_coronatus	✓	✓	✓	✓		4	✓	✓		✓				✓	4	8
124	Gasterosteiformes	297_Fistulariidae	Fistularia	Fistularia_petimba	✓		✓	✓		3	✓			✓	✓	✓		✓	5	8
125	Perciformes	303_Dactylopteridae	Dactyloptena	Dactyloptena_orientalis	✓	✓	✓			3	✓			✓		✓	✓	✓	5	8
126	Perciformes	304_Scorpaenidae	Scorpaenodes	Scorpaenodes_evides	✓	✓	✓	✓	✓	5	✓	✓						✓	3	8
127	Perciformes	304_Scorpaenidae	Sebastes	Sebastes_hubbsi	✓	✓	✓	✓		4	✓	✓		✓				✓	4	8
128	Perciformes	304_Scorpaenidae	Sebastes	Sebastes_joyneri	✓	✓	✓	✓		4	✓			✓			✓	✓	4	8
129	Perciformes	304_Scorpaenidae	Sebastes	Sebastes_pachycephalus	✓	✓	✓	✓		4	✓	✓		✓				✓	4	8
130	Perciformes	313_Platycephalidae	Cociella	Cociella_crocodila	✓		✓	✓		3	✓		✓	✓			✓	✓	5	8
131	Perciformes	316_Hexagrammidae	Hexagrammos	Hexagrammos_agrammus	✓	✓				2	✓	✓	✓	✓			✓	✓	6	8
132	Perciformes	316_Hexagrammidae	Hexagrammos	Hexagrammos_otakii	✓	✓	✓	✓		4	✓			✓			✓	✓	4	8
133	Perciformes	320_Cottidae	Furcina	Furcina_osimae	✓	✓	✓	✓		4	✓	✓		✓				✓	4	8
134	Perciformes	332_Moronidae	Lateolabrax	Lateolabrax_latus	✓			✓	✓	3	✓	✓		✓	✓	✓			5	8
135	Perciformes	352_Apogonidae	Apogonichthyoides	Apogonichthyoides_niger	✓		✓	✓		3	✓	✓		✓	✓			✓	5	8
136	Perciformes	352_Apogonidae	Ostorhinchus	Ostorhinchus_doederleini	✓			✓	✓	3	✓	✓		✓			✓	✓	5	8
137	Perciformes	352_Apogonidae	Ostorhinchus	Ostorhinchus_notatus	✓	✓	✓	✓		4	✓	✓		✓				✓	4	8
138	Perciformes	364_Carangidae	Alectis	Alectis_ciliaris	✓	✓	✓	✓		4	✓			✓	✓	✓			4	8
139	Perciformes	364_Carangidae	Decapterus	Decapterus_maruadsi	✓		✓	✓		3	✓	✓		✓	✓	✓			5	8
140	Perciformes	364_Carangidae	Pseudocaranx	Pseudocaranx_dentex	✓	✓	✓	✓		4	✓			✓	✓			✓	4	8
141	Perciformes	366_Leiognathidae	Equulites	Equulites_rivulatus	✓	✓	✓	✓		4	✓			✓		✓	✓		4	8
142	Perciformes	373_Gerreidae	Gerres	Gerres_equulus	✓	✓	✓	✓		4		✓		✓	✓			✓	4	8
143	Perciformes	380_Polynemidae	Polydactylus	Polydactylus_plebeius	✓	✓	✓			3	✓		✓	✓	✓			✓	5	8
144	Perciformes	382_Mullidae	Mulloidichthys	Mulloidichthys_vanicolensis	✓		✓	✓		3	✓	✓		✓		✓		✓	5	8
145	Perciformes	382_Mullidae	Parupeneus	Parupeneus_ciliatus	✓	✓		✓	✓	4	✓	✓		✓				✓	4	8
146	Perciformes	382_Mullidae	Parupeneus	Parupeneus_spilurus	✓	✓	✓			3	✓	✓		✓		✓		✓	5	8
147	Perciformes	383_Pempheridae	Pempheris	Pempheris_japonica	✓	✓	✓	✓		4		✓		✓		✓		✓	4	8
148	Perciformes	393_Chaetodontidae	Chaetodon	Chaetodon_nippon	✓		✓	✓		3	✓	✓		✓		✓		✓	5	8
149	Perciformes	393_Chaetodontidae	Heniochus	Heniochus_diphreutes	✓	✓	✓	✓		4	✓	✓		✓				✓	4	8
150	Perciformes	394_Pomacanthidae	Chaetodontoplus	Chaetodontoplus_septentrionalis	✓	✓	✓	✓		4	✓	✓		✓				✓	4	8
151	Perciformes	400_Kuhliidae	Kuhlia	Kuhlia_mugil	✓		✓	✓		3	✓	✓		✓		✓		✓	5	8
152	Perciformes	411_Pomacentridae	Pomacentrus	Pomacentrus_coelestis	✓	✓	✓	✓		4	✓	✓		✓				✓	4	8
153	Perciformes	412_Labridae	Halichoeres	Halichoeres_tenuispinis	✓		✓	✓	✓	4	✓	✓		✓				✓	4	8
154	Perciformes	417_Stichaeidae	Zoarchias	Zoarchias_glaber	✓	✓	✓	✓		4	✓	✓		✓				✓	4	8
155	Perciformes	447_Blenniidae	Omobranchus	Omobranchus_elegans	✓	✓	✓	✓		4	✓	✓		✓				✓	4	8
156	Perciformes	447_Blenniidae	Parablennius	Parablennius_yatabei	✓	✓	✓	✓		4	✓	✓		✓				✓	4	8
157	Perciformes	450_Chaenopsidae	Neoclinus	Neoclinus_bryope	✓	✓	✓	✓		4	✓	✓		✓				✓	4	8
158	Perciformes	453_Callionymidae	Repomucenus	Repomucenus_beniteguri	✓	✓	✓	✓		4	✓	✓		✓				✓	4	8
159	Perciformes	453_Callionymidae	Repomucenus	Repomucenus_ornatipinnis	✓		✓	✓		3	✓	✓		✓			✓	✓	5	8
160	Perciformes	460_Gobiidae	Chaenogobius	Chaenogobius_annularis	✓	✓	✓	✓		4	✓	✓		✓				✓	4	8
161	Perciformes	460_Gobiidae	Clariger	Clariger_cosmurus	✓	✓	✓	✓		4	✓	✓		✓				✓	4	8
162	Perciformes	460_Gobiidae	Eviota	Eviota_abax	✓	✓	✓	✓		4	✓	✓		✓				✓	4	8
163	Perciformes	460_Gobiidae	Eviota	Eviota_masudai	✓	✓	✓	✓		4	✓	✓		✓				✓	4	8
164	Perciformes	460_Gobiidae	Favonigobius	Favonigobius_gymnauchen	✓	✓	✓	✓		4	✓	✓		✓				✓	4	8
165	Perciformes	460_Gobiidae	Luciogobius	Luciogobius_guttatus	✓	✓	✓	✓		4	✓	✓		✓				✓	4	8
166	Perciformes	460_Gobiidae	Priolepis	Priolepis_borea	✓	✓	✓	✓		4	✓	✓		✓				✓	4	8
167	Perciformes	460_Gobiidae	Pterogobius	Pterogobius_zonoleucus	✓		✓	✓	✓	4	✓	✓		✓				✓	4	8
168	Perciformes	460_Gobiidae	Sagamia	Sagamia_geneionema		✓	✓	✓		3	✓	✓	✓	✓				✓	5	8
169	Perciformes	462_Ptereleotridae	Ptereleotris	Ptereleotris_hanae		✓	✓	✓	✓	4	✓	✓		✓				✓	4	8
170	Perciformes	469_Zanclidae	Zanclus	Zanclus_cornutus	✓		✓	✓		3	✓	✓		✓	✓			✓	5	8
171	Perciformes	470_Acanthuridae	Naso	Naso_unicornis	✓	✓			✓	3	✓	✓		✓		✓		✓	5	8
172	Perciformes	472_Sphyraenidae	Sphyraena	Sphyraena_japonica	✓		✓	✓		3	✓	✓		✓	✓	✓			5	8
173	Perciformes	475_Scombridae	Auxis	Auxis_thazard_thazard	✓	✓	✓	✓		4	✓			✓	✓	✓			4	8
174	Perciformes	475_Scombridae	Scomber	Scomber_australasicus	✓		✓	✓		3	✓			✓	✓	✓	✓		5	8
175	Tetraodontiformes	504_Triacanthidae	Triacanthus	Triacanthus_biaculeatus	✓	✓	✓	✓		4	✓		✓	✓			✓		4	8
176	Tetraodontiformes	506_Monacanthidae	Brachaluteres	Brachaluteres_ulvarum	✓	✓	✓			3	✓	✓		✓	✓			✓	5	8
177	Tetraodontiformes	506_Monacanthidae	Paramonacanthus	Paramonacanthus_oblongus	✓	✓	✓	✓		4	✓	✓		✓				✓	4	8
178	Tetraodontiformes	507_Ostraciidae	Tetrosomus	Tetrosomus_reipublicae	✓		✓	✓		3	✓	✓			✓	✓		✓	5	8
179	Tetraodontiformes	510_Diodontidae	Chilomycterus	Chilomycterus_reticulatus	✓	✓	✓	✓		4	✓	✓		✓		✓			4	8
180	Heterodontiformes	008_Heterodontidae	Heterodontus	Heterodontus_japonicus		✓	✓	✓		3	✓	✓		✓				✓	4	7
181	Squaliformes	040_Squatinidae	Squatina	Squatina_japonica	✓	✓		✓		3	✓			✓			✓	✓	4	7
182	Rhinobatiformes	047_Rhinobatidae	Rhinobatos	Rhinobatos_schlegelii	✓		✓	✓		3	✓			✓		✓	✓		4	7
183	Myliobatiformes	053_Urolophidae	Urolophus	Urolophus_aurantiacus	✓	✓				2	✓	✓		✓	✓			✓	5	7
184	Anguilliformes	074_Anguillidae	Anguilla	Anguilla_japonica	✓	✓	✓	✓	✓	5	✓			✓					2	7
185	Salmoniformes	172_Osmeridae	Plecoglossus	Plecoglossus_altivelis_altivelis	✓		✓	✓		3	✓	✓	✓	✓					4	7
186	Atheriniformes	251_Atherinidae	Hypoatherina	Hypoatherina_valenciennei	✓	✓		✓		3	✓		✓	✓				✓	4	7
187	Beloniformes	253_Exocoetidae	Cypselurus	Cypselurus_heterurus_doederleini	✓	✓		✓		3	✓			✓	✓	✓			4	7
188	Beloniformes	254_Hemiramphidae	Hyporhamphus	Hyporhamphus_sajori	✓	✓				2	✓		✓	✓	✓			✓	5	7
189	Beloniformes	255_Belonidae	Tylosurus	Tylosurus_crocodilus_crocodilus	✓	✓	✓			3	✓	✓		✓	✓				4	7
190	Gasterosteiformes	295_Syngnathidae	Trachyrhamphus	Trachyrhamphus_serratus	✓		✓			2	✓			✓		✓	✓	✓	5	7
191	Perciformes	304_Scorpaenidae	Scorpaenopsis	Scorpaenopsis_neglecta		✓	✓	✓		3	✓	✓		✓				✓	4	7
192	Perciformes	306_Aploactinidae	Erisphex	Erisphex_pottii	✓	✓	✓	✓		4	✓			✓			✓		3	7
193	Perciformes	355_Malacanthidae	Branchiostegus	Branchiostegus_japonicus	✓		✓	✓		3	✓			✓			✓	✓	4	7
194	Perciformes	364_Carangidae	Naucrates	Naucrates_ductor	✓	✓	✓	✓		4	✓			✓		✓			3	7
195	Perciformes	374_Haemulidae	Hapalogenys	Hapalogenys_sennin	✓		✓	✓		3	✓	✓		✓		✓			4	7
196	Perciformes	382_Mullidae	Upeneus	Upeneus_tragula	✓		✓			2	✓	✓		✓	✓			✓	5	7
197	Perciformes	391_Kyphosidae	Girella	Girella_mezina	✓		✓	✓		3	✓	✓		✓				✓	4	7
198	Perciformes	399_Teraponidae	Rhyncopelates	Rhyncopelates_oxyrhynchus	✓		✓	✓		3	✓			✓	✓			✓	4	7
199	Perciformes	402_Cirrhitidae	Cirrhitichthys	Cirrhitichthys_aureus	✓		✓	✓		3	✓			✓	✓			✓	4	7
200	Perciformes	411_Pomacentridae	Abudefduf	Abudefduf_sordidus	✓		✓	✓		3	✓	✓		✓				✓	4	7
201	Perciformes	417_Stichaeidae	Dictyosoma	Dictyosoma_rubrimaculatum	✓		✓	✓		3	✓	✓		✓				✓	4	7
202	Perciformes	417_Stichaeidae	Zoarchias	Zoarchias_neglectus	✓	✓		✓		3	✓	✓		✓				✓	4	7
203	Perciformes	435_Pinguipedidae	Parapercis	Parapercis_pulchella		✓	✓	✓		3	✓	✓		✓				✓	4	7
204	Perciformes	435_Pinguipedidae	Parapercis	Parapercis_sexfasciata	✓		✓	✓		3	✓			✓			✓	✓	4	7
205	Perciformes	438_Creediidae	Limnichthys	Limnichthys_fasciatus		✓	✓	✓		3	✓	✓		✓				✓	4	7
206	Perciformes	443_Uranoscopidae	Uranoscopus	Uranoscopus_japonicus	✓			✓	✓	3	✓			✓		✓	✓		4	7
207	Perciformes	452_Gobiesocidae	Pherallodus	Pherallodus_indicus		✓	✓	✓		3	✓	✓		✓				✓	4	7
208	Perciformes	453_Callionymidae	Repomucenus	Repomucenus_huguenini	✓	✓	✓			3	✓			✓			✓	✓	4	7
209	Perciformes	453_Callionymidae	Repomucenus	Repomucenus_lunatus	✓		✓	✓		3	✓	✓		✓			✓		4	7
210	Perciformes	460_Gobiidae	Asterropteryx	Asterropteryx_semipunctata		✓	✓	✓		3	✓	✓		✓				✓	4	7
211	Perciformes	460_Gobiidae	Istigobius	Istigobius_hoshinonis		✓	✓	✓		3	✓	✓		✓				✓	4	7
212	Perciformes	475_Scombridae	Auxis	Auxis_rochei_rochei	✓			✓		2	✓			✓	✓	✓	✓		5	7
213	Pleuronectiformes	493_Pleuronectidae	Kareius	Kareius_bicoloratus	✓	✓	✓	✓		4	✓			✓			✓		3	7
214	Pleuronectiformes	493_Pleuronectidae	Pleuronectes	Pleuronectes_yokohamae	✓			✓		2	✓	✓		✓			✓	✓	5	7
215	Pleuronectiformes	493_Pleuronectidae	Pleuronichthys	Pleuronichthys_lighti	✓		✓			2	✓			✓		✓	✓	✓	5	7
216	Tetraodontiformes	505_Balistidae	Canthidermis	Canthidermis_maculata	✓	✓		✓		3	✓			✓			✓	✓	4	7
217	Tetraodontiformes	506_Monacanthidae	Rudarius	Rudarius_ercodes	✓		✓	✓	✓	4		✓		✓				✓	3	7
218	Tetraodontiformes	509_Tetraodontidae	Arothron	Arothron_firmamentum	✓		✓	✓		3	✓			✓	✓		✓		4	7
219	Tetraodontiformes	509_Tetraodontidae	Canthigaster	Canthigaster_axiologa	✓		✓	✓		3	✓	✓		✓				✓	4	7
220	Tetraodontiformes	509_Tetraodontidae	Lagocephalus	Lagocephalus_gloveri	✓	✓	✓	✓		4	✓			✓			✓		3	7
221	Myxiniformes	001_Myxinidae	Eptatretus	Eptatretus_burgeri	✓		✓	✓		3	✓			✓			✓		3	6
222	Torpediniformes	043_Narcinidae	Narke	Narke_japonica	✓	✓	✓			3				✓		✓		✓	3	6
223	Myliobatiformes	057_Gymnuridae	Gymnura	Gymnura_japonica	✓	✓		✓		3	✓			✓		✓			3	6
224	Anguilliformes	079_Muraenidae	Muraena	Muraena_pardalis	✓			✓		2	✓	✓		✓				✓	4	6
225	Anguilliformes	086_Congridae	Ariosoma	Ariosoma_meeki	✓					1	✓			✓		✓	✓	✓	5	6
226	Anguilliformes	086_Congridae	Conger	Conger_myriaster	✓			✓	✓	3	✓			✓			✓		3	6
227	Clupeiformes	097_Clupeidae	Sardinella	Sardinella_zunasi	✓	✓		✓		3	✓		✓	✓					3	6
228	Aulopiformes	187_Synodontidae	Saurida	Saurida_elongata	✓	✓	✓	✓		4				✓			✓		2	6
229	Gadiformes	216_Moridae	Physiculus	Physiculus_maximowiczi	✓			✓	✓	3	✓	✓		✓					3	6
230	Lophiiformes	228_Antennariidae	Antennarius	Antennarius_nummifer			✓	✓		2	✓	✓		✓				✓	4	6
231	Mugiliformes	245_Mugilidae	Chelon	Chelon_affinis	✓	✓		✓		3	✓			✓	✓				3	6
232	Atheriniformes	251_Atherinidae	Atherion	Atherion_elymus	✓		✓	✓		3	✓	✓		✓					3	6
233	Beloniformes	253_Exocoetidae	Cypselurus	Cypselurus_poecilopterus	✓	✓		✓		3	✓			✓	✓				3	6
234	Zeiformes	288_Zeidae	Zenopsis	Zenopsis_nebulosa	✓	✓		✓		3	✓			✓			✓		3	6
235	Gasterosteiformes	295_Syngnathidae	Halicampus	Halicampus_boothae		✓		✓		2	✓	✓		✓				✓	4	6
236	Perciformes	304_Scorpaenidae	Scorpaena	Scorpaena_miostoma	✓		✓	✓		3	✓			✓				✓	3	6
237	Perciformes	313_Platycephalidae	Inegocia	Inegocia_borboniensis	✓			✓		2	✓	✓		✓				✓	4	6
238	Perciformes	320_Cottidae	Vellitor	Vellitor_minutus			✓		✓	2	✓	✓		✓				✓	4	6
239	Perciformes	338_Serranidae	Pseudanthias	Pseudanthias_squamipinnis	✓	✓		✓		3		✓		✓				✓	3	6
240	Perciformes	352_Apogonidae	Jaydia	Jaydia_lineatus	✓	✓	✓	✓		4				✓			✓		2	6
241	Perciformes	352_Apogonidae	Ostorhinchus	Ostorhinchus_taeniophorus	✓			✓		2	✓	✓		✓				✓	4	6
242	Perciformes	364_Carangidae	Decapterus	Decapterus_muroadsi	✓	✓				2	✓			✓	✓	✓			4	6
243	Perciformes	364_Carangidae	Seriolina	Seriolina_nigrofasciata	✓	✓	✓			3	✓			✓			✓		3	6
244	Perciformes	364_Carangidae	Trachinotus	Trachinotus_baillonii	✓	✓		✓		3		✓	✓	✓					3	6
245	Perciformes	364_Carangidae	Uraspis	Uraspis_helvola	✓		✓	✓		3	✓			✓		✓			3	6
246	Perciformes	366_Leiognathidae	Equulites	Equulites_elongatus	✓	✓	✓	✓		4				✓		✓			2	6
247	Perciformes	366_Leiognathidae	Nuchequula	Nuchequula_nuchalis	✓		✓			2	✓		✓	✓				✓	4	6
248	Perciformes	370_Lutjanidae	Lutjanus	Lutjanus_ophuysenii	✓		✓			2	✓			✓	✓			✓	4	6
249	Perciformes	370_Lutjanidae	Lutjanus	Lutjanus_russelli	✓		✓	✓		3	✓			✓				✓	3	6
250	Perciformes	382_Mullidae	Parupeneus	Parupeneus_indicus			✓	✓		2	✓	✓		✓				✓	4	6
251	Perciformes	393_Chaetodontidae	Chaetodon	Chaetodon_auriga	✓		✓	✓		3		✓		✓				✓	3	6
252	Perciformes	393_Chaetodontidae	Chaetodon	Chaetodon_melannotus	✓			✓		2	✓	✓		✓				✓	4	6
253	Perciformes	393_Chaetodontidae	Chaetodon	Chaetodon_vagabundus	✓		✓	✓		3		✓		✓				✓	3	6
254	Perciformes	393_Chaetodontidae	Roa	Roa_modesta	✓	✓	✓			3	✓			✓				✓	3	6
255	Perciformes	410_Embiotocidae	Ditrema	Ditrema_temminckii_temminckii		✓		✓		2					✓	✓	✓	✓	4	6
256	Perciformes	412_Labridae	Labroides	Labroides_dimidiatus				✓	✓	2	✓	✓		✓				✓	4	6
257	Perciformes	412_Labridae	Semicossyphus	Semicossyphus_reticulatus	✓				✓	2	✓	✓		✓				✓	4	6
258	Perciformes	435_Pinguipedidae	Parapercis	Parapercis_snyderi			✓	✓		2	✓	✓		✓				✓	4	6
259	Perciformes	443_Uranoscopidae	Uranoscopus	Uranoscopus_chinensis	✓		✓		✓	3	✓			✓			✓		3	6
260	Perciformes	445_Tripterygiidae	Springerichthys	Springerichthys_bapturus	✓		✓	✓		3	✓			✓				✓	3	6
261	Perciformes	447_Blenniidae	Plagiotremus	Plagiotremus_rhinorhynchos				✓	✓	2	✓	✓		✓				✓	4	6
262	Perciformes	452_Gobiesocidae	Conidens	Conidens_laticephalus	✓	✓	✓	✓		4	✓	✓							2	6
263	Perciformes	460_Gobiidae	Acanthogobius	Acanthogobius_lactipes	✓		✓	✓	✓	4	✓			✓					2	6
264	Perciformes	460_Gobiidae	Acentrogobius	Acentrogobius_pflaumii	✓		✓		✓	3	✓			✓				✓	3	6
265	Perciformes	460_Gobiidae	Amblyeleotris	Amblyeleotris_japonica		✓		✓		2	✓	✓		✓				✓	4	6
266	Perciformes	460_Gobiidae	Clariger	Clariger_sp	✓	✓	✓	✓		4	✓	✓							2	6
267	Perciformes	460_Gobiidae	Eutaeniichthys	Eutaeniichthys_gilli	✓		✓	✓	✓	4	✓			✓					2	6
268	Perciformes	460_Gobiidae	Gymnogobius	Gymnogobius_macrognathos	✓		✓	✓	✓	4	✓			✓					2	6
269	Perciformes	460_Gobiidae	Gymnogobius	Gymnogobius_petschiliensis	✓		✓	✓		3	✓	✓		✓					3	6
270	Perciformes	460_Gobiidae	Pterogobius	Pterogobius_virgo	✓		✓			2	✓	✓		✓				✓	4	6
271	Perciformes	460_Gobiidae	Sicyopterus	Sicyopterus_japonicus	✓		✓	✓	✓	4	✓			✓					2	6
272	Perciformes	460_Gobiidae	Tridentiger	Tridentiger_brevispinis	✓	✓	✓	✓		4	✓			✓					2	6
273	Perciformes	460_Gobiidae	Tridentiger	Tridentiger_obscurus	✓		✓	✓	✓	4	✓			✓					2	6
274	Perciformes	462_Ptereleotridae	Parioglossus	Parioglossus_dotui		✓		✓		2	✓	✓		✓				✓	4	6
275	Perciformes	462_Ptereleotridae	Ptereleotris	Ptereleotris_evides		✓	✓			2	✓	✓		✓				✓	4	6
276	Perciformes	470_Acanthuridae	Acanthurus	Acanthurus_dussumieri	✓					1	✓	✓		✓		✓		✓	5	6
277	Perciformes	470_Acanthuridae	Acanthurus	Acanthurus_xanthopterus			✓	✓		2	✓	✓		✓				✓	4	6
278	Perciformes	475_Scombridae	Scomberomorus	Scomberomorus_niphonius	✓					1	✓			✓	✓	✓	✓		5	6
279	Pleuronectiformes	493_Pleuronectidae	Eopsetta	Eopsetta_grigorjewi	✓		✓		✓	3	✓			✓			✓		3	6
280	Pleuronectiformes	493_Pleuronectidae	Pleuronichthys	Pleuronichthys_cornutus	✓		✓	✓		3	✓			✓				✓	3	6
281	Pleuronectiformes	494_Bothidae	Crossorhombus	Crossorhombus_kobensis	✓	✓				2	✓			✓			✓	✓	4	6
282	Pleuronectiformes	502_Cynoglossidae	Cynoglossus	Cynoglossus_joyneri	✓	✓	✓			3	✓			✓			✓		3	6
283	Tetraodontiformes	506_Monacanthidae	Thamnaconus	Thamnaconus_hypargyreus	✓		✓			2	✓			✓			✓	✓	4	6
284	Tetraodontiformes	509_Tetraodontidae	Lagocephalus	Lagocephalus_sceleratus	✓	✓	✓			3	✓			✓			✓		3	6
285	Tetraodontiformes	509_Tetraodontidae	Takifugu	Takifugu_poecilonotus	✓		✓			2	✓			✓			✓	✓	4	6
286	Carcharhiniformes	023_Scyliorhinidae	Cephaloscyllium	Cephaloscyllium_umbratile	✓		✓	✓		3	✓						✓		2	5
287	Rajiformes	048_Rajidae	Okamejei	Okamejei_schmidti	✓			✓		2	✓			✓			✓		3	5
288	Myliobatiformes	055_Dasyatidae	Dasyatis	Dasyatis_matsubarai	✓		✓	✓		3	✓	✓							2	5
289	Anguilliformes	086_Congridae	Gnathophis	Gnathophis_heterognathos	✓	✓				2	✓			✓			✓		3	5
290	Aulopiformes	187_Synodontidae	Synodus	Synodus_hoshinonis			✓	✓		2	✓			✓				✓	3	5
291	Ophidiiformes	222_Ophidiidae	Brotula	Brotula_multibarbata	✓		✓			2	✓	✓						✓	3	5
292	Lophiiformes	227_Lophiidae	Lophius	Lophius_litulon	✓		✓			2	✓			✓			✓		3	5
293	Mugiliformes	245_Mugilidae	Chelon	Chelon_macrolepis	✓	✓		✓		3		✓		✓					2	5
294	Atheriniformes	251_Atherinidae	Hypoatherina	Hypoatherina_tsurugae	✓			✓		2		✓		✓				✓	3	5
295	Beloniformes	253_Exocoetidae	Cypselurus	Cypselurus_agoo	✓	✓		✓		3	✓			✓					2	5
296	Beloniformes	255_Belonidae	Ablennes	Ablennes_hians	✓	✓				2	✓			✓		✓			3	5
297	Beloniformes	255_Belonidae	Strongylura	Strongylura_anastomella	✓					1	✓		✓	✓				✓	4	5
298	Beryciformes	282_Holocentridae	Sargocentron	Sargocentron_ittodai	✓					1	✓			✓	✓			✓	4	5
299	Gasterosteiformes	290_Aulorhynchidae	Aulichthys	Aulichthys_japonicus				✓		1	✓	✓		✓				✓	4	5
300	Gasterosteiformes	295_Syngnathidae	Festucalex	Festucalex_erythraeus		✓		✓		2		✓		✓				✓	3	5
301	Gasterosteiformes	295_Syngnathidae	Hippichthys	Hippichthys_spicifer	✓	✓	✓	✓		4	✓								1	5
302	Gasterosteiformes	295_Syngnathidae	Hippocampus	Hippocampus_takakurai	✓				✓	2				✓	✓	✓			3	5
303	Perciformes	304_Scorpaenidae	Scorpaenopsis	Scorpaenopsis_cirrosa		✓		✓	✓	3	✓							✓	2	5
304	Perciformes	313_Platycephalidae	Inegocia	Inegocia_guttata			✓			1	✓	✓		✓				✓	4	5
305	Perciformes	313_Platycephalidae	Thysanophrys	Thysanophrys_celebica				✓		1	✓	✓		✓				✓	4	5
306	Perciformes	320_Cottidae	Pseudoblennius	Pseudoblennius_argenteus		✓	✓			2	✓			✓				✓	3	5
307	Perciformes	338_Serranidae	Epinephelus	Epinephelus_fasciatus	✓			✓		2		✓			✓			✓	3	5
308	Perciformes	344_Plesiopidae	Plesiops	Plesiops_coeruleolineatus	✓		✓	✓		3		✓		✓					2	5
309	Perciformes	364_Carangidae	Caranx	Caranx_ignobilis	✓					1	✓		✓	✓			✓		4	5
310	Perciformes	364_Carangidae	Seriola	Seriola_aureovittata	✓					1	✓			✓	✓	✓			4	5
311	Perciformes	370_Lutjanidae	Lutjanus	Lutjanus_gibbus	✓			✓		2	✓	✓						✓	3	5
312	Perciformes	370_Lutjanidae	Lutjanus	Lutjanus_kasmira	✓			✓		2	✓	✓						✓	3	5
313	Perciformes	370_Lutjanidae	Lutjanus	Lutjanus_stellatus			✓	✓		2	✓			✓				✓	3	5
314	Perciformes	372_Lobotidae	Lobotes	Lobotes_surinamensis	✓	✓	✓	✓		4				✓					1	5
315	Perciformes	376_Nemipteridae	Parascolopsis	Parascolopsis_inermis			✓	✓		2	✓			✓				✓	3	5
316	Perciformes	378_Sparidae	Evynnis	Evynnis_cardinalis	✓	✓	✓			3	✓			✓					2	5
317	Perciformes	382_Mullidae	Parupeneus	Parupeneus_heptacanthus			✓			1	✓	✓		✓				✓	4	5
318	Perciformes	382_Mullidae	Parupeneus	Parupeneus_multifasciatus			✓			1	✓	✓		✓				✓	4	5
319	Perciformes	391_Kyphosidae	Kyphosus	Kyphosus_cinerascens	✓	✓	✓			3	✓			✓					2	5
320	Perciformes	393_Chaetodontidae	Chaetodon	Chaetodon_citrinellus			✓			1	✓	✓		✓				✓	4	5
321	Perciformes	393_Chaetodontidae	Chaetodon	Chaetodon_kleinii				✓		1	✓	✓		✓				✓	4	5
322	Perciformes	393_Chaetodontidae	Chaetodon	Chaetodon_lunula	✓			✓		2	✓	✓		✓					3	5
323	Perciformes	396_Pentacerotidae	Evistias	Evistias_acutirostris	✓		✓	✓		3	✓			✓					2	5
324	Perciformes	405_Cheilodactylidae	Cheilodactylus	Cheilodactylus_quadricornis	✓					1	✓			✓			✓	✓	4	5
325	Perciformes	410_Embiotocidae	Ditrema	Ditrema_temminckii_pacificum	✓		✓	✓		3	✓			✓					2	5
326	Perciformes	411_Pomacentridae	Abudefduf	Abudefduf_notatus	✓		✓			2	✓	✓		✓					3	5
327	Perciformes	411_Pomacentridae	Abudefduf	Abudefduf_sexfasciatus			✓	✓		2		✓		✓				✓	3	5
328	Perciformes	411_Pomacentridae	Chromis	Chromis_fumeus				✓		1	✓	✓		✓				✓	4	5
329	Perciformes	411_Pomacentridae	Stegastes	Stegastes_altus	✓		✓	✓		3	✓	✓							2	5
330	Perciformes	412_Labridae	Anampses	Anampses_caeruleopunctatus				✓		1	✓	✓		✓				✓	4	5
331	Perciformes	412_Labridae	Choerodon	Choerodon_azurio			✓	✓		2	✓			✓				✓	3	5
332	Perciformes	412_Labridae	Cirrhilabrus	Cirrhilabrus_temminckii				✓		1	✓	✓		✓				✓	4	5
333	Perciformes	412_Labridae	Macropharyngodon	Macropharyngodon_negrosensis			✓			1	✓	✓		✓				✓	4	5
334	Perciformes	412_Labridae	Oxycheilinus	Oxycheilinus_bimaculatus				✓		1	✓	✓		✓				✓	4	5
335	Perciformes	412_Labridae	Thalassoma	Thalassoma_amblycephalum	✓			✓		2	✓	✓						✓	3	5
336	Perciformes	419_Pholidae	Pholis	Pholis_crassispina			✓			1	✓		✓	✓				✓	4	5
337	Perciformes	441_Ammodytidae	Ammodytes	Ammodytes_japonicus	✓		✓			2	✓			✓			✓		3	5
338	Perciformes	447_Blenniidae	Plagiotremus	Plagiotremus_tapeinosoma				✓		1	✓	✓		✓				✓	4	5
339	Perciformes	450_Chaenopsidae	Neoclinus	Neoclinus_lacunicola				✓		1	✓	✓		✓				✓	4	5
340	Perciformes	450_Chaenopsidae	Neoclinus	Neoclinus_okazakii				✓		1	✓	✓		✓				✓	4	5
341	Perciformes	450_Chaenopsidae	Neoclinus	Neoclinus_toshimaensis		✓				1	✓	✓		✓				✓	4	5
342	Perciformes	453_Callionymidae	Calliurichthys	Calliurichthys_japonicus	✓		✓			2	✓			✓				✓	3	5
343	Perciformes	453_Callionymidae	Neosynchiropus	Neosynchiropus_ijimai				✓		1	✓	✓		✓				✓	4	5
344	Perciformes	453_Callionymidae	Paradiplogrammus	Paradiplogrammus_enneactis				✓		1	✓	✓		✓				✓	4	5
345	Perciformes	460_Gobiidae	Bathygobius	Bathygobius_petrophilus	✓		✓	✓		3	✓			✓					2	5
346	Perciformes	460_Gobiidae	Cryptocentrus	Cryptocentrus_filifer				✓	✓	2	✓			✓				✓	3	5
347	Perciformes	460_Gobiidae	Gymnogobius	Gymnogobius_breunigii	✓		✓	✓		3	✓			✓					2	5
348	Perciformes	460_Gobiidae	Gymnogobius	Gymnogobius_uchidai	✓		✓	✓		3	✓			✓					2	5
349	Perciformes	460_Gobiidae	Gymnogobius	Gymnogobius_urotaenia	✓		✓	✓		3	✓			✓					2	5
350	Perciformes	460_Gobiidae	Luciogobius	Luciogobius_platycephalus	✓	✓	✓			3	✓			✓					2	5
351	Perciformes	460_Gobiidae	Mugilogobius	Mugilogobius_abei	✓		✓	✓		3	✓			✓					2	5
352	Perciformes	460_Gobiidae	Periophthalmus	Periophthalmus_modestus	✓		✓	✓		3	✓			✓					2	5
353	Perciformes	460_Gobiidae	Pseudogobius	Pseudogobius_masago	✓		✓	✓		3	✓			✓					2	5
354	Perciformes	460_Gobiidae	Vanderhorstia	Vanderhorstia_macropteryx	✓			✓		2	✓			✓				✓	3	5
355	Perciformes	460_Gobiidae	Vanderhorstia	Vanderhorstia_sp_1				✓	✓	2	✓			✓				✓	3	5
356	Perciformes	465_Ephippidae	Platax	Platax_teira	✓		✓			2	✓			✓				✓	3	5
357	Perciformes	475_Scombridae	Sarda	Sarda_orientalis	✓	✓				2	✓				✓	✓			3	5
358	Pleuronectiformes	492_Paralichthyidae	Pseudorhombus	Pseudorhombus_cinnamoneus		✓	✓	✓		3	✓			✓					2	5
359	Pleuronectiformes	493_Pleuronectidae	Glyptocephalus	Glyptocephalus_stelleri	✓		✓			2	✓			✓			✓		3	5
360	Tetraodontiformes	505_Balistidae	Sufflamen	Sufflamen_fraenatum	✓					1	✓			✓		✓		✓	4	5
361	Tetraodontiformes	507_Ostraciidae	Ostracion	Ostracion_cubicus				✓		1	✓	✓		✓				✓	4	5
362	Tetraodontiformes	509_Tetraodontidae	Sphoeroides	Sphoeroides_pachygaster	✓		✓			2	✓			✓			✓		3	5
363	Tetraodontiformes	509_Tetraodontidae	Takifugu	Takifugu_exascurus	✓		✓			2	✓			✓	✓				3	5
364	Tetraodontiformes	509_Tetraodontidae	Takifugu	Takifugu_porphyreus	✓			✓		2	✓			✓			✓		3	5
365	Tetraodontiformes	509_Tetraodontidae	Takifugu	Takifugu_rubripes	✓		✓			2	✓			✓			✓		3	5
366	Tetraodontiformes	509_Tetraodontidae	Takifugu	Takifugu_stictonotus	✓	✓				2	✓			✓			✓		3	5
367	Lamniformes	020_Alopiidae	Alopias	Alopias_pelagicus			✓	✓		2	✓			✓					2	4
368	Lamniformes	020_Alopiidae	Alopias	Alopias_vulpinus	✓		✓			2	✓						✓		2	4
369	Lamniformes	022_Lamnidae	Isurus	Isurus_oxyrinchus	✓			✓		2	✓						✓		2	4
370	Carcharhiniformes	027_Triakidae	Mustelus	Mustelus_griseus	✓		✓			2	✓			✓					2	4
371	Carcharhiniformes	029_Carcharhinidae	Galeocerdo	Galeocerdo_cuvier	✓			✓		2	✓						✓		2	4
372	Carcharhiniformes	029_Carcharhinidae	Prionace	Prionace_glauca	✓	✓				2	✓						✓		2	4
373	Carcharhiniformes	030_Sphyrnidae	Sphyrna	Sphyrna_lewini	✓	✓				2	✓			✓					2	4
374	Rajiformes	048_Rajidae	Dipturus	Dipturus_kwangtungensis	✓		✓			2	✓			✓					2	4
375	Rajiformes	048_Rajidae	Raja	Raja_pulchra	✓					1	✓			✓			✓		3	4
376	Rhinobatiformes	049_Platyrhinidae	Platyrhina	Platyrhina_tangi	✓					1	✓			✓	✓				3	4
377	Myliobatiformes	055_Dasyatidae	Dasyatis	Dasyatis_izuensis		✓		✓		2	✓	✓							2	4
378	Elopiformes	070_Megalopidae	Megalops	Megalops_cyprinoides	✓			✓		2	✓			✓					2	4
379	Albuliformes	071_Albulidae	Albula	Albula_sp	✓					1	✓			✓	✓				3	4
380	Anguilliformes	079_Muraenidae	Gymnothorax	Gymnothorax_meleagris				✓		1	✓	✓						✓	3	4
381	Anguilliformes	081_Ophichthidae	Ophichthus	Ophichthus_altipennis	✓			✓		2		✓						✓	2	4
382	Anguilliformes	081_Ophichthidae	Ophichthus	Ophichthus_urolophus	✓			✓		2	✓			✓					2	4
383	Salmoniformes	172_Osmeridae	Hypomesus	Hypomesus_nipponensis	✓				✓	2	✓			✓					2	4
384	Salmoniformes	172_Osmeridae	Salangichthys	Salangichthys_ishikawae	✓					1	✓		✓	✓					3	4
385	Aulopiformes	187_Synodontidae	Saurida	Saurida_wanieso	✓		✓			2	✓			✓					2	4
386	Aulopiformes	187_Synodontidae	Synodus	Synodus_ulae		✓		✓		2	✓							✓	2	4
387	Lophiiformes	227_Lophiidae	Lophiomus	Lophiomus_setigerus	✓					1	✓			✓			✓		3	4
388	Lophiiformes	233_Ogcocephalidae	Halieutaea	Halieutaea_stellata	✓			✓		2	✓			✓					2	4
389	Atheriniformes	247_Notocheiridae	Iso	Iso_flosmaris	✓					1	✓			✓				✓	3	4
390	Beloniformes	253_Exocoetidae	Parexocoetus	Parexocoetus_brachypterus	✓					1	✓			✓		✓			3	4
391	Beloniformes	254_Hemiramphidae	Euleptorhamphus	Euleptorhamphus_viridis	✓	✓				2	✓				✓				2	4
392	Gasterosteiformes	295_Syngnathidae	Doryrhamphus	Doryrhamphus_japonicus	✓			✓		2		✓						✓	2	4
393	Gasterosteiformes	295_Syngnathidae	Syngnathoides	Syngnathoides_biaculeatus	✓					1	✓			✓				✓	3	4
394	Perciformes	304_Scorpaenidae	Dendrochirus	Dendrochirus_bellus	✓		✓			2	✓			✓					2	4
395	Perciformes	304_Scorpaenidae	Dendrochirus	Dendrochirus_brachypterus			✓			1	✓			✓				✓	3	4
396	Perciformes	304_Scorpaenidae	Dendrochirus	Dendrochirus_zebra						0	✓	✓		✓				✓	4	4
397	Perciformes	304_Scorpaenidae	Pterois	Pterois_antennata				✓		1	✓	✓						✓	3	4
398	Perciformes	304_Scorpaenidae	Scorpaenopsis	Scorpaenopsis_papuensis				✓		1	✓	✓						✓	3	4
399	Perciformes	304_Scorpaenidae	Sebastapistes	Sebastapistes_strongia						0	✓	✓		✓				✓	4	4
400	Perciformes	304_Scorpaenidae	Sebastes	Sebastes_cheni	✓			✓		2	✓	✓							2	4
401	Perciformes	304_Scorpaenidae	Sebastes	Sebastes_ventricosus	✓			✓		2	✓	✓							2	4
402	Perciformes	327_Cyclopteridae	Lethotremus	Lethotremus_awae				✓		1	✓	✓		✓					3	4
403	Perciformes	328_Liparidae	Liparis	Liparis_punctulatus				✓		1	✓	✓		✓					3	4
404	Perciformes	328_Liparidae	Liparis	Liparis_tanakae	✓					1	✓			✓			✓		3	4
405	Perciformes	338_Serranidae	Epinephelus	Epinephelus_areolatus	✓			✓		2		✓						✓	2	4
406	Perciformes	338_Serranidae	Epinephelus	Epinephelus_bruneus	✓					1	✓			✓				✓	3	4
407	Perciformes	352_Apogonidae	Apogon	Apogon_coccineus					✓	1		✓		✓				✓	3	4
408	Perciformes	352_Apogonidae	Apogon	Apogon_semiornatus					✓	1	✓			✓				✓	3	4
409	Perciformes	352_Apogonidae	Ostorhinchus	Ostorhinchus_kiensis	✓					1	✓			✓				✓	3	4
410	Perciformes	362_Rachycentridae	Rachycentron	Rachycentron_canadum	✓	✓				2	✓			✓					2	4
411	Perciformes	363_Echeneidae	Echeneis	Echeneis_naucrates	✓					1	✓			✓	✓				3	4
412	Perciformes	363_Echeneidae	Remora	Remora_brachyptera	✓		✓			2	✓			✓					2	4
413	Perciformes	364_Carangidae	Caranx	Caranx_melampygus	✓	✓	✓			3				✓					1	4
414	Perciformes	364_Carangidae	Decapterus	Decapterus_akaadsi	✓					1				✓	✓		✓		3	4
415	Perciformes	364_Carangidae	Decapterus	Decapterus_tabl	✓		✓			2	✓				✓				2	4
416	Perciformes	364_Carangidae	Elagatis	Elagatis_bipinnulata	✓					1	✓			✓		✓			3	4
417	Perciformes	364_Carangidae	Scomberoides	Scomberoides_lysan	✓					1			✓	✓				✓	3	4
418	Perciformes	365_Menidae	Mene	Mene_maculata	✓					1	✓			✓	✓				3	4
419	Perciformes	376_Nemipteridae	Pentapodus	Pentapodus_nagasakiensis			✓			1	✓			✓				✓	3	4
420	Perciformes	378_Sparidae	Acanthopagrus	Acanthopagrus_latus	✓					1	✓			✓			✓		3	4
421	Perciformes	378_Sparidae	Dentex	Dentex_hypselosomus			✓	✓		2	✓			✓					2	4
422	Perciformes	381_Sciaenidae	Larimichthys	Pennahia_argentata	✓					1	✓			✓			✓		3	4
423	Perciformes	382_Mullidae	Mulloidichthys	Mulloidichthys_flavolineatus			✓			1		✓		✓				✓	3	4
424	Perciformes	382_Mullidae	Parupeneus	Parupeneus_barberinoides						0	✓	✓		✓				✓	4	4
425	Perciformes	391_Kyphosidae	Kyphosus	Kyphosus_bigibbus		✓		✓		2	✓	✓							2	4
426	Perciformes	393_Chaetodontidae	Heniochus	Heniochus_acuminatus	✓	✓				2	✓			✓					2	4
427	Perciformes	407_Cepolidae	Cepola	Cepola_schlegelii	✓					1	✓			✓			✓		3	4
428	Perciformes	411_Pomacentridae	Amphiprion	Amphiprion_clarkii						0	✓	✓		✓				✓	4	4
429	Perciformes	411_Pomacentridae	Chromis	Chromis_margaritifer						0	✓	✓		✓				✓	4	4
430	Perciformes	411_Pomacentridae	Chrysiptera	Chrysiptera_brownriggii				✓		1	✓	✓		✓					3	4
431	Perciformes	411_Pomacentridae	Dascyllus	Dascyllus_trimaculatus						0	✓	✓		✓				✓	4	4
432	Perciformes	411_Pomacentridae	Pomacentrus	Pomacentrus_nagasakiensis						0	✓	✓		✓				✓	4	4
433	Perciformes	412_Labridae	Anampses	Anampses_melanurus			✓			1	✓			✓				✓	3	4
434	Perciformes	412_Labridae	Cheilio	Cheilio_inermis				✓		1	✓	✓						✓	3	4
435	Perciformes	412_Labridae	Halichoeres	Halichoeres_chrysus						0	✓	✓		✓				✓	4	4
436	Perciformes	412_Labridae	Halichoeres	Halichoeres_melanochir						0	✓	✓		✓				✓	4	4
437	Perciformes	412_Labridae	Pseudojuloides	Pseudojuloides_elongatus	✓					1	✓	✓						✓	3	4
438	Perciformes	412_Labridae	Thalassoma	Thalassoma_lunare						0	✓	✓		✓				✓	4	4
439	Perciformes	417_Stichaeidae	Sticaeus	Sticaeus_grigorjewi	✓		✓			2	✓						✓		2	4
440	Perciformes	437_Trichonotidae	Trichonotus	Trichonotus_setiger	✓					1	✓			✓				✓	3	4
441	Perciformes	447_Blenniidae	Aspidontus	Aspidontus_dussumieri						0	✓	✓		✓				✓	4	4
442	Perciformes	447_Blenniidae	Entomacrodus	Entomacrodus_stellifer_stellifer	✓			✓		2	✓	✓							2	4
443	Perciformes	447_Blenniidae	Petroscirtes	Petroscirtes_springeri						0	✓	✓		✓				✓	4	4
444	Perciformes	450_Chaenopsidae	Neoclinus	Neoclinus_chihiroe		✓				1	✓			✓				✓	3	4
445	Perciformes	453_Callionymidae	Repomucenus	Repomucenus_valenciennei	✓					1	✓		✓	✓					3	4
446	Perciformes	460_Gobiidae	Acentrogobius	Acentrogobius_sp_2	✓			✓		2	✓			✓					2	4
447	Perciformes	460_Gobiidae	Acentrogobius	Acentrogobius_virgatulus	✓		✓			2	✓			✓					2	4
448	Perciformes	460_Gobiidae	Amblychaeturichthys	Amblychaeturichthys_hexanema	✓					1	✓			✓			✓		3	4
449	Perciformes	460_Gobiidae	Amblychaeturichthys	Amblychaeturichthys_sciistius	✓					1	✓			✓			✓		3	4
450	Perciformes	460_Gobiidae	Bathygobius	Bathygobius_cocosensis			✓	✓		2	✓	✓							2	4
451	Perciformes	460_Gobiidae	Bathygobius	Bathygobius_cyclopterus	✓					1	✓			✓				✓	3	4
452	Perciformes	460_Gobiidae	Gnatholepis	Gnatholepis_cauerensis	✓					1	✓			✓				✓	3	4
453	Perciformes	460_Gobiidae	Gymnogobius	Gymnogobius_heptacanthus	✓					1	✓		✓	✓					3	4
454	Perciformes	460_Gobiidae	Leucopsarion	Leucopsarion_petersii	✓					1	✓		✓	✓					3	4
455	Perciformes	460_Gobiidae	Luciogobius	Luciogobius_elongatus	✓	✓				2	✓			✓					2	4
456	Perciformes	460_Gobiidae	Priolepis	Priolepis_cincta						0	✓	✓		✓				✓	4	4
457	Perciformes	460_Gobiidae	Pterogobius	Pterogobius_zacalles	✓					1	✓			✓				✓	3	4
458	Perciformes	460_Gobiidae	Redigobius	Redigobius_bikolanus	✓			✓		2	✓			✓					2	4
459	Perciformes	465_Ephippidae	Platax	Platax_orbicularis	✓			✓		2		✓		✓					2	4
460	Perciformes	470_Acanthuridae	Acanthurus	Acanthurus_olivaceus			✓			1	✓			✓				✓	3	4
461	Perciformes	475_Scombridae	Euthynnus	Euthynnus_affinis	✓		✓			2				✓	✓				2	4
462	Pleuronectiformes	493_Pleuronectidae	Microstomus	Microstomus_achne	✓					1	✓			✓			✓		3	4
463	Pleuronectiformes	493_Pleuronectidae	Platichthys	Platichthys_stellatus	✓					1	✓			✓			✓		3	4
464	Pleuronectiformes	493_Pleuronectidae	Verasper	Verasper_variegatus	✓					1	✓			✓			✓		3	4
465	Pleuronectiformes	494_Bothidae	Asterorhombus	Asterorhombus_intermedius	✓	✓				2				✓				✓	2	4
466	Pleuronectiformes	494_Bothidae	Bothus	Bothus_pantherinus	✓					1		✓		✓				✓	3	4
467	Pleuronectiformes	494_Bothidae	Engyprosopon	Engyprosopon_grandisquama	✓			✓		2				✓				✓	2	4
468	Pleuronectiformes	501_Soleidae	Aesopia	Aesopia_cornuta	✓					1	✓			✓			✓		3	4
469	Pleuronectiformes	501_Soleidae	Parachirus	Parachirus_sp				✓		1		✓		✓				✓	3	4
470	Pleuronectiformes	501_Soleidae	Pardachirus	Pardachirus_pavoninus	✓					1	✓			✓				✓	3	4
471	Pleuronectiformes	501_Soleidae	Pseudaesopia	Pseudaesopia_japonica	✓		✓			2	✓			✓					2	4
472	Pleuronectiformes	502_Cynoglossidae	Cynoglossus	Cynoglossus_interruptus	✓		✓			2	✓			✓					2	4
473	Tetraodontiformes	505_Balistidae	Melichthys	Melichthys_vidua		✓				1	✓			✓				✓	3	4
474	Tetraodontiformes	506_Monacanthidae	Cantherhines	Cantherhines_pardalis	✓			✓		2	✓	✓							2	4
475	Tetraodontiformes	507_Ostraciidae	Lactoria	Lactoria_cornuta			✓			1	✓			✓				✓	3	4
476	Tetraodontiformes	509_Tetraodontidae	Arothron	Arothron_hispidus	✓		✓			2				✓				✓	2	4
477	Tetraodontiformes	509_Tetraodontidae	Lagocephalus	Lagocephalus_inermis	✓			✓		2	✓						✓		2	4
478	Tetraodontiformes	509_Tetraodontidae	Takifugu	Takifugu_vermicularis	✓		✓		✓	3				✓					1	4
479	Tetraodontiformes	511_Molidae	Mola	Mola_sp_B	✓					1				✓		✓	✓		3	4
480	Lamniformes	022_Lamnidae	Lamna	Lamna_ditropis	✓					1	✓						✓		2	3
481	Carcharhiniformes	027_Triakidae	Hemitriakis	Hemitriakis_japanica	✓					1	✓					✓			2	3
482	Carcharhiniformes	029_Carcharhinidae	Carcharhinus	Carcharhinus_falciformis	✓					1	✓						✓		2	3
483	Carcharhiniformes	029_Carcharhinidae	Carcharhinus	Carcharhinus_plumbeus	✓					1	✓						✓		2	3
484	Carcharhiniformes	030_Sphyrnidae	Sphyrna	Sphyrna_zygaena	✓					1	✓						✓		2	3
485	Pristiophoriformes	041_Pristiophoridae	Pristiophorus	Pristiophorus_japonicus	✓					1	✓						✓		2	3
486	Torpediniformes	043_Narcinidae	Crassinarke	Crassinarke_dormitor	✓	✓				2						✓			1	3
487	Rajiformes	048_Rajidae	Okamejei	Okamejei_kenojei		✓				1	✓			✓					2	3
488	Myliobatiformes	058_Myliobatidae	Mobula	Mobula_japonica	✓					1	✓			✓					2	3
489	Anguilliformes	079_Muraenidae	Gymnothorax	Gymnothorax_minor				✓		1	✓			✓					2	3
490	Anguilliformes	081_Ophichthidae	Ophichthus	Ophichthus_erabo			✓			1	✓			✓					2	3
491	Anguilliformes	084_Muraenesocidae	Muraenesox	Muraenesox_cinereus					✓	1	✓			✓					2	3
492	Anguilliformes	086_Congridae	Ariosoma	Ariosoma_majus				✓		1	✓			✓					2	3
493	Salmoniformes	175_Salmonidae	Oncorhynchus	Oncorhynchus_keta	✓					1				✓			✓		2	3
494	Lampridiformes	201_Veliferidae	Velifer	Velifer_hypselopterus			✓			1	✓			✓					2	3
495	Mugiliformes	245_Mugilidae	Chelon	Chelon_haematocheilus	✓					1	✓			✓					2	3
496	Beloniformes	253_Exocoetidae	Cypselurus	Cypselurus_hiraii	✓	✓				2				✓					1	3
497	Beloniformes	253_Exocoetidae	Cypselurus	Cypselurus_unicolor				✓		1		✓		✓					2	3
498	Beloniformes	254_Hemiramphidae	Hyporhamphus	Hyporhamphus_intermedius	✓				✓	2				✓					1	3
499	Beryciformes	282_Holocentridae	Ostichthys	Ostichthys_japonicus	✓					1	✓						✓		2	3
500	Gasterosteiformes	293_Pegasidae	Eurypegasus	Eurypegasus_draconis			✓			1				✓				✓	2	3
501	Gasterosteiformes	295_Syngnathidae	Hippocampus	Hippocampus_japonicus			✓			1	✓			✓					2	3
502	Gasterosteiformes	295_Syngnathidae	Urocampus	Urocampus_nanus	✓		✓			2				✓					1	3
503	Perciformes	304_Scorpaenidae	Erosa	Erosa_erosa			✓			1	✓			✓					2	3
504	Perciformes	304_Scorpaenidae	Inimicus	Inimicus_japonicus						0	✓			✓				✓	3	3
505	Perciformes	304_Scorpaenidae	Pterois	Pterois_volitans						0	✓			✓				✓	3	3
506	Perciformes	304_Scorpaenidae	Sebastes	Sebastes_oblongus					✓	1	✓			✓					2	3
507	Perciformes	304_Scorpaenidae	Sebastes	Sebastes_schlegeli				✓		1	✓			✓					2	3
508	Perciformes	316_Hexagrammidae	Pleurogrammus	Pleurogrammus_azonus	✓					1	✓			✓					2	3
509	Perciformes	320_Cottidae	Furcina	Furcina_ishikawae		✓				1	✓			✓					2	3
510	Perciformes	320_Cottidae	Pseudoblennius	Pseudoblennius_sp_2						0	✓			✓				✓	3	3
511	Perciformes	323_Hemitripteridae	Hemitripterus	Hemitripterus_villosus	✓					1	✓						✓		2	3
512	Perciformes	325_Psychrolutidae	Dasycottus	Dasycottus_setiger	✓					1	✓						✓		2	3
513	Perciformes	338_Serranidae	Sacura	Sacura_margaritacea	✓					1	✓							✓	2	3
514	Perciformes	352_Apogonidae	Ostorhinchus	Ostorhinchus_cookii	✓				✓	2	✓								1	3
515	Perciformes	352_Apogonidae	Ostorhinchus	Ostorhinchus_holotaenia	✓					1	✓	✓							2	3
516	Perciformes	352_Apogonidae	Ostorhinchus	Ostorhinchus_properuptus				✓		1				✓				✓	2	3
517	Perciformes	355_Malacanthidae	Branchiostegus	Branchiostegus_auratus	✓					1	✓						✓		2	3
518	Perciformes	364_Carangidae	Carangoides	Carangoides_orthogrammus	✓			✓		2						✓			1	3
519	Perciformes	364_Carangidae	Megalaspis	Megalaspis_cordyla				✓	✓	2				✓					1	3
520	Perciformes	364_Carangidae	Seriola	Seriola_rivoliana	✓		✓			2				✓					1	3
521	Perciformes	370_Lutjanidae	Aprion	Aprion_virescens			✓	✓		2				✓					1	3
522	Perciformes	370_Lutjanidae	Lutjanus	Lutjanus_monostigma	✓			✓		2		✓							1	3
523	Perciformes	371_Caesionidae	Pterocaesio	Pterocaesio_marri	✓	✓		✓		3									0	3
524	Perciformes	373_Gerreidae	Gerres	Gerres_erythrourus	✓					1	✓			✓					2	3
525	Perciformes	376_Nemipteridae	Nemipterus	Nemipterus_virgatus			✓			1	✓			✓					2	3
526	Perciformes	376_Nemipteridae	Parascolopsis	Parascolopsis_eriomma			✓			1	✓			✓					2	3
527	Perciformes	377_Lethrinidae	Monotaxis	Monotaxis_grandoculis						0	✓	✓						✓	3	3
528	Perciformes	378_Sparidae	Rhabdosargus	Rhabdosargus_sarba	✓					1	✓			✓					2	3
529	Perciformes	393_Chaetodontidae	Chaetodon	Chaetodon_ephippium				✓		1	✓			✓					2	3
530	Perciformes	393_Chaetodontidae	Chaetodon	Chaetodon_lineolatus						0	✓			✓				✓	3	3
531	Perciformes	393_Chaetodontidae	Chaetodon	Chaetodon_selene	✓			✓		2				✓					1	3
532	Perciformes	393_Chaetodontidae	Coradion	Coradion_altivelis						0	✓			✓				✓	3	3
533	Perciformes	393_Chaetodontidae	Heniochus	Heniochus_monoceros				✓		1		✓		✓					2	3
534	Perciformes	394_Pomacanthidae	Pomacanthus	Pomacanthus_imperator	✓					1	✓	✓							2	3
535	Perciformes	394_Pomacanthidae	Pomacanthus	Pomacanthus_semicirculatus				✓		1		✓		✓					2	3
536	Perciformes	411_Pomacentridae	Abudefduf	Abudefduf_bengalensis	✓		✓			2	✓								1	3
537	Perciformes	411_Pomacentridae	Chrysiptera	Chrysiptera_unimaculata						0	✓			✓				✓	3	3
538	Perciformes	411_Pomacentridae	Plectroglyphidodon	Plectroglyphidodon_leucozonus				✓		1	✓	✓							2	3
539	Perciformes	412_Labridae	Gomphosus	Gomphosus_varius				✓		1	✓							✓	2	3
540	Perciformes	412_Labridae	Iniistius	Iniistius_dea						0	✓			✓				✓	3	3
541	Perciformes	412_Labridae	Macropharyngodon	Macropharyngodon_meleagris						0	✓			✓				✓	3	3
542	Perciformes	412_Labridae	Suezichthys	Suezichthys_gracilis						0	✓			✓				✓	3	3
543	Perciformes	412_Labridae	Thalassoma	Thalassoma_purpureum						0	✓			✓				✓	3	3
544	Perciformes	437_Trichonotidae	Trichonotus	Trichonotus_filamentosus						0	✓			✓				✓	3	3
545	Perciformes	447_Blenniidae	Omobranchus	Omobranchus_fasciolatoceps	✓					1	✓			✓					2	3
546	Perciformes	447_Blenniidae	Omobranchus	Omobranchus_punctatus	✓					1	✓			✓					2	3
547	Perciformes	447_Blenniidae	Praealticus	Praealticus_margaritarius						0	✓			✓				✓	3	3
548	Perciformes	452_Gobiesocidae	Diademichthys	Diademichthys_lineatus						0	✓			✓				✓	3	3
549	Perciformes	452_Gobiesocidae	Lepadichthys	Lepadichthys_frenatus						0	✓			✓				✓	3	3
550	Perciformes	453_Callionymidae	Diplogrammus	Diplogrammus_xenicus				✓		1	✓	✓							2	3
551	Perciformes	453_Callionymidae	Repomucenus	Repomucenus_virgis	✓					1	✓						✓		2	3
552	Perciformes	457_Eleotridae	Eleotris	Eleotris_oxycephala	✓		✓			2	✓								1	3
553	Perciformes	460_Gobiidae	Bryaninops	Bryaninops_amplus						0	✓			✓				✓	3	3
554	Perciformes	460_Gobiidae	Bryaninops	Bryaninops_yongei						0	✓			✓				✓	3	3
555	Perciformes	460_Gobiidae	Cryptocentrus	Cryptocentrus_shigensis				✓		1	✓							✓	2	3
556	Perciformes	460_Gobiidae	Eviota	Eviota_prasina	✓			✓		2		✓							1	3
557	Perciformes	460_Gobiidae	Glossogobius	Glossogobius_olivaceus	✓					1	✓			✓					2	3
558	Perciformes	460_Gobiidae	Gymnogobius	Gymnogobius_castaneus	✓		✓	✓		3									0	3
559	Perciformes	460_Gobiidae	Hazeus	Hazeus_otakii						0	✓			✓				✓	3	3
560	Perciformes	460_Gobiidae	Lubricogobius	Lubricogobius_exiguus						0	✓			✓				✓	3	3
561	Perciformes	460_Gobiidae	Luciogobius	Luciogobius_ama	✓			✓		2	✓								1	3
562	Perciformes	460_Gobiidae	Luciogobius	Luciogobius_koma		✓		✓		2	✓								1	3
563	Perciformes	460_Gobiidae	Luciogobius	Luciogobius_parvulus	✓	✓				2	✓								1	3
564	Perciformes	460_Gobiidae	Mahidolia	Mahidolia_mystacina						0	✓			✓				✓	3	3
565	Perciformes	460_Gobiidae	Pleurosicya	Pleurosicya_boldinghi						0	✓			✓				✓	3	3
566	Perciformes	460_Gobiidae	Priolepis	Priolepis_akihitoi						0	✓			✓				✓	3	3
567	Perciformes	460_Gobiidae	Rhinogobius	Rhinogobius_brunneus	✓					1	✓			✓					2	3
568	Perciformes	460_Gobiidae	Rhinogobius	Rhinogobius_fluviatilis	✓					1	✓			✓					2	3
569	Perciformes	460_Gobiidae	Rhinogobius	Rhinogobius_nagoyae	✓		✓	✓		3									0	3
570	Perciformes	460_Gobiidae	Tridentiger	Tridentiger_bifasciatus	✓					1	✓			✓					2	3
571	Perciformes	460_Gobiidae	Trimma	Trimma_grammistes						0	✓			✓				✓	3	3
572	Perciformes	460_Gobiidae	Valenciennea	Valenciennea_helsdingenii						0	✓			✓				✓	3	3
573	Perciformes	460_Gobiidae	Valenciennea	Valenciennea_strigata						0	✓	✓						✓	3	3
574	Perciformes	461_Microdesmidae	Gunnellichthys	Gunnellichthys_viridescens						0	✓			✓				✓	3	3
575	Perciformes	462_Ptereleotridae	Parioglossus	Parioglossus_philippinus		✓				1	✓			✓					2	3
576	Perciformes	465_Ephippidae	Platax	Platax_pinnatus	✓					1	✓					✓			2	3
577	Perciformes	470_Acanthuridae	Acanthurus	Acanthurus_triostegus	✓					1	✓	✓							2	3
578	Perciformes	470_Acanthuridae	Ctenochaetus	Ctenochaetus_binotatus						0	✓			✓				✓	3	3
579	Perciformes	470_Acanthuridae	Ctenochaetus	Ctenochaetus_striatus						0	✓			✓				✓	3	3
580	Perciformes	470_Acanthuridae	Naso	Naso_hexacanthus						0	✓			✓				✓	3	3
581	Perciformes	470_Acanthuridae	Naso	Naso_lopezi	✓					1	✓					✓			2	3
582	Perciformes	470_Acanthuridae	Naso	Naso_thynnoides						0	✓			✓				✓	3	3
583	Perciformes	472_Sphyraenidae	Sphyraena	Sphyraena_barracuda	✓					1				✓				✓	2	3
584	Pleuronectiformes	494_Bothidae	Engyprosopon	Engyprosopon_multisquama						0	✓			✓				✓	3	3
585	Pleuronectiformes	501_Soleidae	Aseraggodes	Aseraggodes_kobensis	✓		✓			2				✓					1	3
586	Tetraodontiformes	505_Balistidae	Abalistes	Abalistes_stellatus						0	✓			✓				✓	3	3
587	Tetraodontiformes	505_Balistidae	Pseudobalistes	Pseudobalistes_flavimarginatus						0	✓			✓				✓	3	3
588	Tetraodontiformes	505_Balistidae	Sufflamen	Sufflamen_chrysopterum						0	✓			✓				✓	3	3
589	Tetraodontiformes	509_Tetraodontidae	Lagocephalus	Lagocephalus_lagocephalus				✓		1	✓			✓					2	3
590	Orectolobiformes	015_Rhincodontidae	Stegostoma	Stegostoma_fasciatum						0	✓			✓					2	2
591	Lamniformes	019_Megachasmidae	Megachasma	Megachasma_pelagios						0	✓			✓					2	2
592	Carcharhiniformes	023_Scyliorhinidae	Galeus	Galeus_sauteri	✓					1	✓								1	2
593	Elopiformes	069_Elopidae	Elops	Elops_hawaiensis	✓					1				✓					1	2
594	Anguilliformes	079_Muraenidae	Gymnothorax	Gymnothorax_albimarginatus		✓				1								✓	1	2
595	Anguilliformes	081_Ophichthidae	Apterichtus	Apterichtus_flavicaudus						0	✓							✓	2	2
596	Anguilliformes	086_Congridae	Conger	Conger_erebennus				✓		1	✓								1	2
597	Clupeiformes	097_Clupeidae	Sardinella	Sardinella_lemuru	✓			✓		2									0	2
598	Gonorynchiformes	098_Chanidae	Chanos	Chanos_chanos						0	✓			✓					2	2
599	Cypriniformes	102_Cyprinidae	Tribolodon	Tribolodon_brandtii_maruta	✓					1				✓					1	2
600	Salmoniformes	172_Osmeridae	Salangichthys	Salangichthys_microdon			✓			1	✓								1	2
601	Ophidiiformes	221_Carapidae	Encheliophis	Encheliophis_sagamianus	✓					1	✓								1	2
602	Lophiiformes	228_Antennariidae	Antennarius	Antennarius_scriptissimus			✓			1				✓					1	2
603	Mugiliformes	245_Mugilidae	Crenimugil	Crenimugil_crenilabis						0	✓			✓					2	2
604	Mugiliformes	245_Mugilidae	Moolgarda	Moolgarda_perusii						0	✓			✓					2	2
605	Mugiliformes	245_Mugilidae	Oedalechilus	Oedalechilus_labiosus	✓					1	✓								1	2
606	Beloniformes	253_Exocoetidae	Cypselurus	Cypselurus_furcatus	✓					1						✓			1	2
607	Beloniformes	253_Exocoetidae	Cypselurus	Cypselurus_pinnatibarbatus_japonicus	✓					1	✓								1	2
608	Beloniformes	253_Exocoetidae	Hirundichthys	Hirundichthys_oxycephalus	✓					1				✓					1	2
609	Beloniformes	253_Exocoetidae	Prognichthys	Prognichthys_brevipinnis				✓		1				✓					1	2
610	Beryciformes	282_Holocentridae	Myripristis	Myripristis_adusta						0				✓				✓	2	2
611	Beryciformes	282_Holocentridae	Myripristis	Myripristis_greenfieldi						0				✓				✓	2	2
612	Beryciformes	282_Holocentridae	Myripristis	Myripristis_kochiensis				✓		1		✓							1	2
613	Gasterosteiformes	295_Syngnathidae	Hippichthys	Hippichthys_penicillus	✓			✓		2									0	2
614	Gasterosteiformes	295_Syngnathidae	Trachyrhamphus	Trachyrhamphus_bicoarctatus						0		✓						✓	2	2
615	Perciformes	304_Scorpaenidae	Scorpaena	Scorpaena_onaria	✓					1								✓	1	2
616	Perciformes	304_Scorpaenidae	Scorpaenopsis	Scorpaenopsis_diabolus				✓		1		✓							1	2
617	Perciformes	304_Scorpaenidae	Sebastapistes	Sebastapistes_perplexa			✓			1		✓							1	2
618	Perciformes	304_Scorpaenidae	Sebastes	Sebastes_longispinis			✓			1				✓					1	2
619	Perciformes	304_Scorpaenidae	Sebastes	Sebastes_vulpes						0	✓			✓					2	2
620	Perciformes	304_Scorpaenidae	Sebastiscus	Sebastiscus_tertius	✓					1	✓								1	2
621	Perciformes	318_Rhamphocottidae	Rhamphocottus	Rhamphocottus_richardsonii						0	✓			✓					2	2
622	Perciformes	320_Cottidae	Ocynectes	Ocynectes_modestus	✓					1	✓								1	2
623	Perciformes	323_Hemitripteridae	Blepsias	Blepsias_cirrhosus			✓			1	✓								1	2
624	Perciformes	324_Agonidae	Occella	Occella_iburia			✓			1	✓								1	2
625	Perciformes	328_Liparidae	Liparis	Liparis_agassizii	✓					1							✓		1	2
626	Perciformes	338_Serranidae	Caprodon	Caprodon_schlegelii	✓			✓		2									0	2
627	Perciformes	338_Serranidae	Chelidoperca	Chelidoperca_hirundinacea	✓	✓				2									0	2
628	Perciformes	338_Serranidae	Epinephelus	Epinephelus_akaara			✓			1				✓					1	2
629	Perciformes	338_Serranidae	Epinephelus	Epinephelus_octofasciatus	✓					1							✓		1	2
630	Perciformes	346_Opistognathidae	Opistognathus	Opistognathus_iyonis						0	✓			✓					2	2
631	Perciformes	352_Apogonidae	Apogon	Apogon_seminigracaudus						0				✓				✓	2	2
632	Perciformes	352_Apogonidae	Cheilodipterus	Cheilodipterus_macrodon						0				✓				✓	2	2
633	Perciformes	352_Apogonidae	Jaydia	Jaydia_carinatus						0	✓			✓					2	2
634	Perciformes	352_Apogonidae	Ostorhinchus	Ostorhinchus_aureus				✓		1		✓							1	2
635	Perciformes	355_Malacanthidae	Malacanthus	Malacanthus_brevirostris						0				✓				✓	2	2
636	Perciformes	358_Scombropidae	Scombrops	Scombrops_gilberti						0	✓			✓					2	2
637	Perciformes	363_Echeneidae	Remora	Remora_remora						0	✓			✓					2	2
638	Perciformes	364_Carangidae	Carangoides	Carangoides_ferdau				✓		1				✓					1	2
639	Perciformes	364_Carangidae	Caranx	Caranx_papuensis	✓					1				✓					1	2
640	Perciformes	364_Carangidae	Decapterus	Decapterus_macarellus				✓		1				✓					1	2
641	Perciformes	370_Lutjanidae	Aphareus	Aphareus_rutilans						0	✓			✓					2	2
642	Perciformes	370_Lutjanidae	Lutjanus	Lutjanus_rufolineatus						0	✓							✓	2	2
643	Perciformes	373_Gerreidae	Gerres	Gerres_filamentosus	✓					1				✓					1	2
644	Perciformes	373_Gerreidae	Gerres	Gerres_japonicus						0	✓			✓					2	2
645	Perciformes	376_Nemipteridae	Nemipterus	Nemipterus_bathybius			✓			1				✓					1	2
646	Perciformes	381_Sciaenidae	Pennahia	Nibea_albiflora						0	✓			✓					2	2
647	Perciformes	382_Mullidae	Parupeneus	Parupeneus_barberinus						0				✓				✓	2	2
648	Perciformes	382_Mullidae	Upeneus	Upeneus_vittatus						0	✓			✓					2	2
649	Perciformes	391_Kyphosidae	Kyphosus	Kyphosus_pacificus			✓			1				✓					1	2
650	Perciformes	393_Chaetodontidae	Chaetodon	Chaetodon_guentheri						0	✓							✓	2	2
651	Perciformes	393_Chaetodontidae	Chaetodon	Chaetodon_speculum	✓					1				✓					1	2
652	Perciformes	396_Pentacerotidae	Histiopterus	Histiopterus_typus	✓					1	✓								1	2
653	Perciformes	400_Kuhliidae	Kuhlia	Kuhlia_marginata				✓		1	✓								1	2
654	Perciformes	402_Cirrhitidae	Cirrhitichthys	Cirrhitichthys_aprinus						0	✓							✓	2	2
655	Perciformes	402_Cirrhitidae	Cirrhitichthys	Cirrhitichthys_oxycephalus				✓		1		✓							1	2
656	Perciformes	402_Cirrhitidae	Cyprinocirrhites	Cyprinocirrhites_polyactis						0	✓							✓	2	2
657	Perciformes	402_Cirrhitidae	Oxycirrhites	Oxycirrhites_typus						0	✓							✓	2	2
658	Perciformes	407_Cepolidae	Acanthocepola	Acanthocepola_limbata	✓					1				✓					1	2
659	Perciformes	410_Embiotocidae	Ditrema	Ditrema_viride						0				✓				✓	2	2
660	Perciformes	411_Pomacentridae	Abudefduf	Abudefduf_septemfasciatus	✓					1	✓								1	2
661	Perciformes	411_Pomacentridae	Amphiprion	Amphiprion_ocellaris			✓	✓		2									0	2
662	Perciformes	411_Pomacentridae	Chromis	Chromis_albicauda	✓					1								✓	1	2
663	Perciformes	411_Pomacentridae	Chromis	Chromis_xanthura	✓					1	✓								1	2
664	Perciformes	412_Labridae	Bodianus	Bodianus_dictynna						0	✓							✓	2	2
665	Perciformes	412_Labridae	Bodianus	Bodianus_oxycephalus						0	✓			✓					2	2
666	Perciformes	412_Labridae	Cirrhilabrus	Cirrhilabrus_cyanopleura						0	✓							✓	2	2
667	Perciformes	412_Labridae	Coris	Coris_aygula	✓					1		✓							1	2
668	Perciformes	412_Labridae	Halichoeres	Halichoeres_marginatus				✓		1		✓							1	2
669	Perciformes	412_Labridae	Halichoeres	Halichoeres_nebulosus				✓		1		✓							1	2
670	Perciformes	412_Labridae	Iniistius	Iniistius_pavo						0	✓							✓	2	2
671	Perciformes	412_Labridae	Novaculichthys	Novaculichthys_taeniourus				✓		1		✓							1	2
672	Perciformes	412_Labridae	Stethojulis	Stethojulis_bandanensis	✓					1	✓								1	2
673	Perciformes	412_Labridae	Thalassoma	Thalassoma_lutescens						0	✓							✓	2	2
674	Perciformes	414_Scaridae	Scarus	Scarus_ovifrons	✓					1	✓								1	2
675	Perciformes	417_Stichaeidae	Chirolophis	Chirolophis_japonicus						0	✓			✓					2	2
676	Perciformes	417_Stichaeidae	Zoarchias	Zoarchias_veneficus						0	✓			✓					2	2
677	Perciformes	435_Pinguipedidae	Parapercis	Parapercis_kamoharai				✓		1		✓							1	2
678	Perciformes	447_Blenniidae	Aspidontus	Aspidontus_taeniatus_taeniatus				✓		1		✓							1	2
679	Perciformes	447_Blenniidae	Cirripectes	Cirripectes_polyzona				✓		1		✓							1	2
680	Perciformes	447_Blenniidae	Omobranchus	Omobranchus_loxozonus	✓					1	✓								1	2
681	Perciformes	447_Blenniidae	Scartella	Scartella_emarginata	✓					1				✓					1	2
682	Perciformes	453_Callionymidae	Neosynchiropus	Neosynchiropus_ocellatus				✓		1		✓							1	2
683	Perciformes	460_Gobiidae	Bathygobius	Bathygobius_hongkongensis	✓			✓		2									0	2
684	Perciformes	460_Gobiidae	Callogobius	Callogobius_hasseltii						0				✓				✓	2	2
685	Perciformes	460_Gobiidae	Clariger	Clariger_papillosus						0	✓			✓					2	2
686	Perciformes	460_Gobiidae	Ctenotrypauchen	Ctenotrypauchen_microcephalus						0	✓			✓					2	2
687	Perciformes	460_Gobiidae	Fusigobius	Fusigobius_duospilus						0				✓				✓	2	2
688	Perciformes	460_Gobiidae	Gnatholepis	Gnatholepis_anjerensis				✓		1		✓							1	2
689	Perciformes	460_Gobiidae	Gymnogobius	Gymnogobius_mororanus						0	✓			✓					2	2
690	Perciformes	460_Gobiidae	Heteroplopomus	Heteroplopomus_barbatus						0	✓			✓					2	2
691	Perciformes	460_Gobiidae	Luciogobius	Luciogobius_sp_6	✓		✓			2									0	2
692	Perciformes	460_Gobiidae	Oligolepis	Oligolepis_acutipennis				✓		1	✓								1	2
693	Perciformes	460_Gobiidae	Parachaeturichthys	Parachaeturichthys_polynema						0	✓			✓					2	2
694	Perciformes	460_Gobiidae	Platygobiopsis	Platygobiopsis_tansei			✓			1	✓								1	2
695	Perciformes	460_Gobiidae	Rhinogobius	Rhinogobius_similis	✓					1	✓								1	2
696	Perciformes	460_Gobiidae	Rhinogobius	Rhinogobius_sp_CO			✓			1	✓								1	2
697	Perciformes	460_Gobiidae	Stonogobiops	Stonogobiops_nematodes						0	✓							✓	2	2
698	Perciformes	460_Gobiidae	Stonogobiops	Stonogobiops_xanthorhinica						0	✓							✓	2	2
699	Perciformes	460_Gobiidae	Taenioides	Taenioides_cirratus	✓			✓		2									0	2
700	Perciformes	460_Gobiidae	Tomiyamichthys	Tomiyamichthys_oni						0	✓							✓	2	2
701	Perciformes	460_Gobiidae	Valenciennea	Valenciennea_wardi						0	✓							✓	2	2
702	Perciformes	462_Ptereleotridae	Ptereleotris	Ptereleotris_heteroptera						0	✓							✓	2	2
703	Perciformes	466_Scatophagidae	Scatophagus	Scatophagus_argus				✓		1	✓								1	2
704	Perciformes	470_Acanthuridae	Acanthurus	Acanthurus_leucopareius	✓					1						✓			1	2
705	Perciformes	470_Acanthuridae	Acanthurus	Acanthurus_mata						0	✓							✓	2	2
706	Perciformes	470_Acanthuridae	Naso	Naso_brevirostris						0	✓							✓	2	2
707	Perciformes	472_Sphyraenidae	Sphyraena	Sphyraena_obtusata				✓		1		✓							1	2
708	Perciformes	475_Scombridae	Acanthocybium	Acanthocybium_solandri						0	✓						✓		2	2
709	Perciformes	475_Scombridae	Gymnosarda	Gymnosarda_unicolor			✓			1				✓					1	2
710	Pleuronectiformes	492_Paralichthyidae	Tarphops	Tarphops_elegans	✓					1	✓								1	2
711	Pleuronectiformes	493_Pleuronectidae	Pleuronectes	Pleuronectes_herzensteini	✓					1				✓					1	2
712	Pleuronectiformes	502_Cynoglossidae	Cynoglossus	Cynoglossus_robustus	✓					1				✓					1	2
713	Tetraodontiformes	505_Balistidae	Balistoides	Balistoides_conspicillum						0	✓			✓					2	2
714	Tetraodontiformes	505_Balistidae	Balistoides	Balistoides_viridescens				✓		1		✓							1	2
715	Tetraodontiformes	506_Monacanthidae	Pervagor	Pervagor_janthinosoma						0	✓							✓	2	2
716	Tetraodontiformes	507_Ostraciidae	Ostracion	Ostracion_meleagris				✓		1		✓							1	2
717	Tetraodontiformes	507_Ostraciidae	Ostracion	Ostracion_rhinorhynchus						0	✓			✓					2	2
718	Tetraodontiformes	509_Tetraodontidae	Arothron	Arothron_caeruleopunctatus			✓			1	✓								1	2
719	Tetraodontiformes	509_Tetraodontidae	Takifugu	Takifugu_xanthopterus						0	✓			✓					2	2
720	Tetraodontiformes	510_Diodontidae	Diodon	Diodon_hystrix		✓		✓		2									0	2
721	Tetraodontiformes	511_Molidae	Masturus	Masturus_lanceolatus	✓					1	✓								1	2
722	Orectolobiformes	011_Orectolobidae	Orectolobus	Orectolobus_japonicus						0	✓								1	1
723	Orectolobiformes	015_Rhincodontidae	Rhincodon	Rhincodon_typus						0	✓								1	1
724	Lamniformes	016_Odontaspididae	Odontaspis	Odontaspis_ferox	✓					1									0	1
725	Lamniformes	020_Alopiidae	Alopias	Alopias_superciliosus						0	✓								1	1
726	Lamniformes	021_Cetorhinidae	Cetorhinus	Cetorhinus_maximus						0	✓								1	1
727	Carcharhiniformes	029_Carcharhinidae	Carcharhinus	Carcharhinus_brachyurus						0	✓								1	1
728	Carcharhiniformes	029_Carcharhinidae	Carcharhinus	Carcharhinus_brevipinna	✓					1									0	1
729	Carcharhiniformes	029_Carcharhinidae	Carcharhinus	Carcharhinus_longimanus						0	✓								1	1
730	Carcharhiniformes	029_Carcharhinidae	Carcharhinus	Carcharhinus_obscurus						0	✓								1	1
731	Lamniformes	029_Carcharhinidae	Carcharodon	Carcharodon_carcharias						0				✓					1	1
732	Carcharhiniformes	029_Carcharhinidae	Rhizoprionodon	Rhizoprionodon_acutus						0	✓								1	1
733	Torpediniformes	043_Narcinidae	Torpedo	Torpedo_california	✓					1									0	1
734	Torpediniformes	043_Narcinidae	Torpedo	Torpedo_tokionis	✓					1									0	1
735	Rajiformes	048_Rajidae	Dipturus	Dipturus_tengu						0	✓								1	1
736	Rajiformes	048_Rajidae	Okamejei	Okamejei_acutispina	✓					1									0	1
737	Myliobatiformes	055_Dasyatidae	Pteroplatytrygon	Pteroplatytrygon_violacea						0				✓					1	1
738	Myliobatiformes	058_Myliobatidae	Manta	Manta_birostris						0							✓		1	1
739	Acipenseriformes	060_Acipenseridae	Acipenser	Acipenser_sinensis						0	✓								1	1
740	Anguilliformes	074_Anguillidae	Anguilla	Anguilla_marmorata						0	✓								1	1
741	Anguilliformes	079_Muraenidae	Anarchias	Anarchias_seychellensis						0	✓								1	1
742	Anguilliformes	079_Muraenidae	Enchelycore	Enchelycore_lichenosa						0				✓					1	1
743	Anguilliformes	079_Muraenidae	Gymnothorax	Gymnothorax_prionodon						0								✓	1	1
744	Anguilliformes	079_Muraenidae	Gymnothorax	Gymnothorax_sagmacephalus						0	✓								1	1
745	Anguilliformes	079_Muraenidae	Uropterygius	Uropterygius_concolor						0								✓	1	1
746	Anguilliformes	081_Ophichthidae	Brachysomophis	Brachysomophis_porphyreus						0				✓					1	1
747	Anguilliformes	081_Ophichthidae	Pisodonophis	Pisodonophis_cancrivorus						0				✓					1	1
748	Anguilliformes	086_Congridae	Ariosoma	Ariosoma_anago						0								✓	1	1
749	Clupeiformes	095_Engraulidae	Encrasicholina	Encrasicholina_punctifer	✓					1									0	1
750	Clupeiformes	097_Clupeidae	Sardinella	Sardinella_melanura						0			✓						1	1
751	Cypriniformes	102_Cyprinidae	Tribolodon	Tribolodon_hakonensis						0				✓					1	1
752	Salmoniformes	175_Salmonidae	Oncorhynchus	Oncorhynchus_masou_masou						0				✓					1	1
753	Aulopiformes	187_Synodontidae	Synodus	Synodus_dermatogenys						0				✓					1	1
754	Lampridiformes	201_Veliferidae	Metavelifer	Metavelifer_mutiradiatus						0	✓								1	1
755	Ophidiiformes	221_Carapidae	Carapus	Carapus_kagoshimanus						0	✓								1	1
756	Lophiiformes	228_Antennariidae	Antennarius	Antennarius_commersoni						0								✓	1	1
757	Lophiiformes	228_Antennariidae	Antennarius	Antennarius_maculatus						0				✓					1	1
758	Mugiliformes	245_Mugilidae	Moolgarda	Moolgarda_seheli	✓					1									0	1
759	Beloniformes	253_Exocoetidae	Cypselurus	Cypselurus_naresii						0				✓					1	1
760	Beloniformes	253_Exocoetidae	Cypselurus	Cypselurus_starksi						0				✓					1	1
761	Beloniformes	253_Exocoetidae	Danichthys	Danichthys_rondeletii						0	✓								1	1
762	Beloniformes	253_Exocoetidae	Exocoetus	Exocoetus_monocirrhus						0				✓					1	1
763	Beloniformes	253_Exocoetidae	Exocoetus	Exocoetus_volitans						0	✓								1	1
764	Beloniformes	253_Exocoetidae	Hirundichthys	Hirundichthys_speculiger						0				✓					1	1
765	Beloniformes	255_Belonidae	Tylosurus	Tylosurus_acus_melanotus				✓		1									0	1
766	Beryciformes	278_Anomalopidae	Anomalops	Anomalops_katoptron						0	✓								1	1
767	Beryciformes	282_Holocentridae	Sargocentron	Sargocentron_spinosissimum						0				✓					1	1
768	Gasterosteiformes	291_Gasterosteidae	Gasterosteus	Gasterosteus_nipponicus	✓					1									0	1
769	Gasterosteiformes	294_Solenostomidae	Solenostomus	Solenostomus_sp						0								✓	1	1
770	Gasterosteiformes	295_Syngnathidae	Hippocampus	Hippocampus_kelloggi						0				✓					1	1
771	Gasterosteiformes	295_Syngnathidae	Hippocampus	Hippocampus_sindonis						0								✓	1	1
772	Gasterosteiformes	295_Syngnathidae	Maroubra	Maroubra_yasudai						0						✓			1	1
773	Gasterosteiformes	295_Syngnathidae	Microphis	Microphis_brachyurus_brachyurus			✓			1									0	1
774	Gasterosteiformes	295_Syngnathidae	Trachyrhamphus	Trachyrhamphus_longirostris						0				✓					1	1
775	Gasterosteiformes	296_Aulostomidae	Aulostomus	Aulostomus_chinensis						0								✓	1	1
776	Gasterosteiformes	299_Centriscidae	Aeoliscus	Aeoliscus_strigatus				✓		1									0	1
777	Perciformes	304_Scorpaenidae	Inimicus	Inimicus_didactylus		✓				1									0	1
778	Perciformes	304_Scorpaenidae	Minous	Minous_monodactylus						0	✓								1	1
779	Perciformes	304_Scorpaenidae	Pterois	Pterois_paucispinula			✓			1									0	1
780	Perciformes	304_Scorpaenidae	Scorpaenodes	Scorpaenodes_scaber_						0		✓							1	1
781	Perciformes	304_Scorpaenidae	Scorpaenopsis	Scorpaenopsis_oxycephala						0				✓					1	1
782	Perciformes	304_Scorpaenidae	Scorpaenopsis	Scorpaenopsis_venosa	✓					1									0	1
783	Perciformes	304_Scorpaenidae	Sebastes	Sebastes_ijimae						0	✓								1	1
784	Perciformes	304_Scorpaenidae	Sebastes	Sebastes_nivosus						0	✓								1	1
785	Perciformes	304_Scorpaenidae	Sebastes	Sebastes_thompsoni						0								✓	1	1
786	Perciformes	304_Scorpaenidae	Sebastes	Sebastes_trivittatus	✓					1									0	1
787	Perciformes	304_Scorpaenidae	Snyderina	Snyderina_yamanokami						0	✓								1	1
788	Perciformes	306_Aploactinidae	Cocotropus	Cocotropus_izuensis						0	✓								1	1
789	Perciformes	310_Triglidae	Chelidonichthys	Lepidotrigla_japonica						0								✓	1	1
790	Perciformes	310_Triglidae	Chelidonichthys	Lepidotrigla_guentheri						0								✓	1	1
791	Perciformes	310_Triglidae	Chelidonichthys	Lepidotrigla_kishinouyei						0								✓	1	1
792	Perciformes	313_Platycephalidae	Onigocia	Onigocia_macrolepis						0	✓								1	1
793	Perciformes	313_Platycephalidae	Platycephalus	Platycephalus_sp_1						0				✓					1	1
794	Perciformes	313_Platycephalidae	Rogadius	Rogadius_asper	✓					1									0	1
795	Perciformes	320_Cottidae	Astrocottus	Astrocottus_matsubarae						0				✓					1	1
796	Perciformes	320_Cottidae	Bero	Bero_elegans						0				✓					1	1
797	Perciformes	320_Cottidae	Myoxocephalus	Myoxocephalus_stelleri			✓			1									0	1
798	Perciformes	324_Agonidae	Brachyopsis	Brachyopsis_segaliensis			✓			1									0	1
799	Perciformes	324_Agonidae	Percis	Percis_matsuii			✓			1									0	1
800	Perciformes	327_Cyclopteridae	Aptocyclus	Aptocyclus_ventricocus						0	✓								1	1
801	Perciformes	327_Cyclopteridae	Eumicrotremus	Eumicrotremus_asperrimus						0	✓								1	1
802	Perciformes	328_Liparidae	Liparis	Liparis_burkei						0	✓								1	1
803	Perciformes	328_Liparidae	Liparis	Liparis_frenatus						0	✓								1	1
804	Perciformes	328_Liparidae	Liparis	Liparis_tessellatus						0				✓					1	1
805	Perciformes	332_Moronidae	Lateolabrax	Lateolabrax_maculatus						0				✓					1	1
806	Perciformes	337_Polyprionidae	Stereolepis	Stereolepis_doederleini						0								✓	1	1
807	Perciformes	338_Serranidae	Cephalopholis	Cephalopholis_argus	✓					1									0	1
808	Perciformes	338_Serranidae	Chelidoperca	Chelidoperca_pleurospila				✓		1									0	1
809	Perciformes	338_Serranidae	Epinephelus	Epinephelus_coeruleopunctatus						0	✓								1	1
810	Perciformes	338_Serranidae	Epinephelus	Epinephelus_epistictus						0				✓					1	1
811	Perciformes	338_Serranidae	Epinephelus	Epinephelus_trimaculatus						0	✓								1	1
812	Perciformes	338_Serranidae	Pseudanthias	Pseudanthias_cooperi						0								✓	1	1
813	Perciformes	338_Serranidae	Pseudanthias	Pseudanthias_fasciatus						0								✓	1	1
814	Perciformes	351_Priacanthidae	Heteropriacanthus	Heteropriacanthus_cruentatus						0				✓					1	1
815	Perciformes	351_Priacanthidae	Priacanthus	Priacanthus_macracanthus						0								✓	1	1
816	Perciformes	352_Apogonidae	Apogon	Apogon_unicolor						0	✓								1	1
817	Perciformes	352_Apogonidae	Cheilodipterus	Cheilodipterus_intermedius						0								✓	1	1
818	Perciformes	352_Apogonidae	Cheilodipterus	Cheilodipterus_quinquelineatus						0		✓							1	1
819	Perciformes	352_Apogonidae	Gymnapogon	Gymnapogon_japonicus						0	✓								1	1
820	Perciformes	352_Apogonidae	Ostorhinchus	Ostorhinchus_nigrofasciatus						0								✓	1	1
821	Perciformes	352_Apogonidae	Ostorhinchus	Ostorhinchus_quadrifasciatus		✓				1									0	1
822	Perciformes	352_Apogonidae	Sphaeramia	Sphaeramia_nematoptera	✓					1									0	1
823	Perciformes	355_Malacanthidae	Malacanthus	Malacanthus_latovittatus						0		✓							1	1
824	Perciformes	363_Echeneidae	Phtheirichthys	Phtheirichthys_lineatus						0	✓								1	1
825	Perciformes	363_Echeneidae	Remora	Remora_osteochir	✓					1									0	1
826	Perciformes	363_Echeneidae	Remorina	Remorina_albescens						0	✓								1	1
827	Perciformes	364_Carangidae	Carangichthys	Carangichthys_dinema						0				✓					1	1
828	Perciformes	364_Carangidae	Carangichthys	Carangichthys_oblongus						0				✓					1	1
829	Perciformes	364_Carangidae	Carangoides	Carangoides_armatus						0				✓					1	1
830	Perciformes	364_Carangidae	Carangoides	Carangoides_caeruleopinnatus			✓			1									0	1
831	Perciformes	364_Carangidae	Caranx	Caranx_lugubris				✓		1									0	1
832	Perciformes	364_Carangidae	Parastromateus	Parastromateus_niger						0	✓								1	1
833	Perciformes	364_Carangidae	Scomberoides	Scomberoides_tol						0	✓								1	1
834	Perciformes	364_Carangidae	Selaroides	Selaroides_leptolepis						0				✓					1	1
835	Perciformes	370_Lutjanidae	Aphareus	Aphareus_furcatus			✓			1									0	1
836	Perciformes	370_Lutjanidae	Lutjanus	Lutjanus_argentimaculatus				✓		1									0	1
837	Perciformes	370_Lutjanidae	Lutjanus	Lutjanus_fulviflamma	✓					1									0	1
838	Perciformes	370_Lutjanidae	Lutjanus	Lutjanus_fulvus	✓					1									0	1
839	Perciformes	370_Lutjanidae	Lutjanus	Lutjanus_sebae				✓		1									0	1
840	Perciformes	370_Lutjanidae	Lutjanus	Lutjanus_vitta	✓					1									0	1
841	Perciformes	373_Gerreidae	Gerres	Gerres_macracanthus	✓					1									0	1
842	Perciformes	374_Haemulidae	Hapalogenys	Hapalogenys_nigripinnis						0				✓					1	1
843	Perciformes	374_Haemulidae	Plectorhinchus	Plectorhinchus_albovittatus						0				✓					1	1
844	Perciformes	374_Haemulidae	Plectorhinchus	Plectorhinchus_chrysotaenia				✓		1									0	1
845	Perciformes	374_Haemulidae	Plectorhinchus	Plectorhinchus_gibbosus						0	✓								1	1
846	Perciformes	374_Haemulidae	Plectorhinchus	Plectorhinchus_lessonii						0	✓								1	1
847	Perciformes	374_Haemulidae	Plectorhinchus	Plectorhinchus_schotaf						0		✓							1	1
848	Perciformes	374_Haemulidae	Plectorhinchus	Plectorhinchus_vittatus						0		✓							1	1
849	Perciformes	377_Lethrinidae	Lethrinus	Lethrinus_nebulosus						0				✓					1	1
850	Perciformes	377_Lethrinidae	Lethrinus	Lethrinus_ornatus	✓					1									0	1
851	Perciformes	377_Lethrinidae	Lethrinus	Lethrinus_semicinctus						0				✓					1	1
852	Perciformes	378_Sparidae	Dentex	Dentex_abei	✓					1									0	1
853	Perciformes	381_Sciaenidae	Johnius	Argyrosomus_japonicus	✓					1									0	1
854	Perciformes	381_Sciaenidae	Nibea	Johnius_grypotus						0				✓					1	1
855	Perciformes	383_Pempheridae	Pempheris	Pempheris_adusta						0				✓					1	1
856	Perciformes	387_Monodactylidae	Monodachtylus	Monodachtylus_argenteus				✓		1									0	1
857	Perciformes	393_Chaetodontidae	Chaetodon	Chaetodon_baronessa						0	✓								1	1
858	Perciformes	393_Chaetodontidae	Chaetodon	Chaetodon_bennetti						0	✓								1	1
859	Perciformes	393_Chaetodontidae	Chaetodon	Chaetodon_lunulatus						0	✓								1	1
860	Perciformes	393_Chaetodontidae	Chaetodon	Chaetodon_rafflesi						0				✓					1	1
861	Perciformes	393_Chaetodontidae	Chaetodon	Chaetodon_ulietensis						0	✓								1	1
862	Perciformes	393_Chaetodontidae	Chaetodon	Chaetodon_wiebeli						0				✓					1	1
863	Perciformes	393_Chaetodontidae	Forcipiger	Forcipiger_flavissimus						0								✓	1	1
864	Perciformes	394_Pomacanthidae	Chaetodontoplus	Chaetodontoplus_chrysocephalus						0								✓	1	1
865	Perciformes	399_Teraponidae	Terapon	Terapon_theraps						0	✓								1	1
866	Perciformes	400_Kuhliidae	Kuhlia	Kuhlia_rupestris						0				✓					1	1
867	Perciformes	407_Cepolidae	Acanthocepola	Acanthocepola_indica						0				✓					1	1
868	Perciformes	407_Cepolidae	Acanthocepola	Acanthocepola_krusensternii						0				✓					1	1
869	Perciformes	410_Embiotocidae	Ditrema	Ditrema_jordani						0	✓								1	1
870	Perciformes	411_Pomacentridae	Amblyglyphidodon	Amblyglyphidodon_ternatensis						0				✓					1	1
871	Perciformes	411_Pomacentridae	Chromis	Chromis_yamakawai						0	✓								1	1
872	Perciformes	411_Pomacentridae	Chrysiptera	Chrysiptera_biocellata						0	✓								1	1
873	Perciformes	411_Pomacentridae	Chrysiptera	Chrysiptera_cyanea						0				✓					1	1
874	Perciformes	412_Labridae	Coris	Coris_dorsomacula						0		✓							1	1
875	Perciformes	412_Labridae	Coris	Coris_picta						0	✓								1	1
876	Perciformes	412_Labridae	Cymolutes	Cymolutes_torquatus						0	✓								1	1
877	Perciformes	412_Labridae	Halichoeres	Halichoeres_hartzfeldii	✓					1									0	1
878	Perciformes	412_Labridae	Hologymnosus	Hologymnosus_rhodonotus						0	✓								1	1
879	Perciformes	412_Labridae	Stethojulis	Stethojulis_trilineata	✓					1									0	1
880	Perciformes	414_Scaridae	Scarus	Scarus_ghobban						0	✓								1	1
881	Perciformes	416_Zoarcidae	Davidijordania	Davidijordania_poecilimon						0	✓								1	1
882	Perciformes	435_Pinguipedidae	Parapercis	Parapercis_ommatura						0				✓					1	1
883	Perciformes	443_Uranoscopidae	Uranoscopus	Uranoscopus_bicinctus						0	✓								1	1
884	Perciformes	447_Blenniidae	Entomacrodus	Entomacrodus_striatus				✓		1									0	1
885	Perciformes	447_Blenniidae	Istiblennius	Istiblennius_edentulus	✓					1									0	1
886	Perciformes	447_Blenniidae	Salarias	Salarias_fasciatus				✓		1									0	1
887	Perciformes	447_Blenniidae	Xiphasia	Xiphasia_setifer						0	✓								1	1
888	Perciformes	452_Gobiesocidae	Aspasmichthys	Aspasmichthys_ciconiae						0	✓								1	1
889	Perciformes	453_Callionymidae	Eleutherochir	Eleutherochir_mirabilis	✓					1									0	1
890	Perciformes	453_Callionymidae	Minysynchiropus	Minysynchiropus_kiyoae						0		✓							1	1
891	Perciformes	453_Callionymidae	Pseudocalliurichthys	Pseudocalliurichthys_variegatus						0	✓								1	1
892	Perciformes	457_Eleotridae	Eleotris	Eleotris_acanthopoma						0	✓								1	1
893	Perciformes	457_Eleotridae	Eleotris	Eleotris_fusca				✓		1									0	1
894	Perciformes	459_Kraemeriidae	Kraemeria	Kraemeria_cunicularia						0	✓								1	1
895	Perciformes	459_Kraemeriidae	Kraemeria	Kraemeria_sexradiata						0				✓					1	1
896	Perciformes	460_Gobiidae	Astrabe	Astrabe_flavimaculata						0	✓								1	1
897	Perciformes	460_Gobiidae	Awaous	Awaous_melanocephalus						0	✓								1	1
898	Perciformes	460_Gobiidae	Barbuligobius	Barbuligobius_boehlkei	✓					1									0	1
899	Perciformes	460_Gobiidae	Bathygobius	Bathygobius_laddi						0	✓								1	1
900	Perciformes	460_Gobiidae	Bathygobius	Bathygobius_padangensis						0	✓								1	1
901	Perciformes	460_Gobiidae	Callogobius	Callogobius_tanegasimae				✓		1									0	1
902	Perciformes	460_Gobiidae	Clariger	Clariger_sirahamaensis						0	✓								1	1
903	Perciformes	460_Gobiidae	Drombus	Drombus_sp				✓		1									0	1
904	Perciformes	460_Gobiidae	Eviota	Eviota_albolineata						0	✓								1	1
905	Perciformes	460_Gobiidae	Favonigobius	Favonigobius_reichei				✓		1									0	1
906	Perciformes	460_Gobiidae	Gobiopsis	Gobiopsis_arenaria			✓			1									0	1
907	Perciformes	460_Gobiidae	Gymnogobius	Gymnogobius_opperiens	✓					1									0	1
908	Perciformes	460_Gobiidae	Luciogobius	Luciogobius_grandis						0				✓					1	1
909	Perciformes	460_Gobiidae	Luciogobius	Luciogobius_sp_1						0	✓								1	1
910	Perciformes	460_Gobiidae	Oligolepis	Oligolepis_stomias				✓		1									0	1
911	Perciformes	460_Gobiidae	Oxyurichthys	Oxyurichthys_visayanus				✓		1									0	1
912	Perciformes	460_Gobiidae	Palutrus	Palutrus_meteori						0				✓					1	1
913	Perciformes	460_Gobiidae	Pleurosicya	Pleurosicya_mossambica						0	✓								1	1
914	Perciformes	460_Gobiidae	Priolepis	Priolepis_latifascima						0	✓								1	1
915	Perciformes	460_Gobiidae	Silhouettea	Silhouettea_dotui						0	✓								1	1
916	Perciformes	460_Gobiidae	Siphonogobius	Siphonogobius_nue		✓				1									0	1
917	Perciformes	460_Gobiidae	Tridentiger	Tridentiger_barbatus						0	✓								1	1
918	Perciformes	460_Gobiidae	Valenciennea	Valenciennea_puellaris						0	✓								1	1
919	Perciformes	460_Gobiidae	Valenciennea	Valenciennea_randalli						0				✓					1	1
920	Perciformes	462_Ptereleotridae	Nemateleotris	Nemateleotris_magnifica						0	✓								1	1
921	Perciformes	462_Ptereleotridae	Ptereleotris	Ptereleotris_microlepis						0	✓								1	1
922	Perciformes	462_Ptereleotridae	Ptereleotris	Ptereleotris_monoptera						0	✓								1	1
923	Perciformes	462_Ptereleotridae	Ptereleotris	Ptereleotris_rubristigma						0	✓								1	1
924	Perciformes	465_Ephippidae	Platax	Platax_boersii						0	✓								1	1
925	Perciformes	467_Siganidae	Siganus	Siganus_spinus	✓					1									0	1
926	Perciformes	470_Acanthuridae	Acanthurus	Acanthurus_maculiceps	✓					1									0	1
927	Perciformes	470_Acanthuridae	Zebrasoma	Zebrasoma_scopas						0				✓					1	1
928	Perciformes	472_Sphyraenidae	Sphyraena	Sphyraena_forsteri						0				✓					1	1
929	Perciformes	475_Scombridae	Scomberomorus	Scomberomorus_sinensis						0	✓								1	1
930	Pleuronectiformes	492_Paralichthyidae	Pseudorhombus	Pseudorhombus_arsius	✓					1									0	1
931	Pleuronectiformes	493_Pleuronectidae	Verasper	Verasper_moseri						0				✓					1	1
932	Pleuronectiformes	494_Bothidae	Engyprosopon	Engyprosopon_longipelvis	✓					1									0	1
933	Pleuronectiformes	502_Cynoglossidae	Arelia	Arelia_bilineata						0				✓					1	1
934	Pleuronectiformes	502_Cynoglossidae	Cynoglossus	Cynoglossus_itinus			✓			1									0	1
935	Pleuronectiformes	502_Cynoglossidae	Cynoglossus	Cynoglossus_lighti			✓			1									0	1
936	Tetraodontiformes	505_Balistidae	Rhinecanthus	Rhinecanthus_aculeatus			✓			1									0	1
937	Tetraodontiformes	505_Balistidae	Rhinecanthus	Rhinecanthus_verrucosus				✓		1									0	1
938	Tetraodontiformes	506_Monacanthidae	Acreichthys	Acreichthys_tomentosus						0								✓	1	1
939	Tetraodontiformes	506_Monacanthidae	Chaetodermis	Chaetodermis_penicilligera						0	✓								1	1
940	Tetraodontiformes	506_Monacanthidae	Paraluteres	Paraluteres_prionurus	✓					1									0	1
941	Tetraodontiformes	506_Monacanthidae	Rudarius	Rudarius_excelsus						0	✓								1	1
942	Tetraodontiformes	509_Tetraodontidae	Arothron	Arothron_immaculatus				✓		1									0	1
943	Tetraodontiformes	509_Tetraodontidae	Arothron	Arothron_reticularis						0	✓								1	1
944	Tetraodontiformes	509_Tetraodontidae	Arothron	Arothron_stellatus						0	✓								1	1
945	Tetraodontiformes	509_Tetraodontidae	Canthigaster	Canthigaster_compressa		✓				1									0	1
946	Tetraodontiformes	509_Tetraodontidae	Canthigaster	Canthigaster_valentini						0				✓					1	1
947	Tetraodontiformes	510_Diodontidae	Diodon	Diodon_eydouxii			✓			1									0	1
948	Tetraodontiformes	511_Molidae	Ranzania	Ranzania_laevis				✓		1									0	1
References Aoki T, Usui S, Kanai T, Aoki S, Okamoto K, Sano M (2016) Comparison of fish assemblage structures between exposed and protected sandy beaches at Uchibo, Boso Peninsula, central Japan. Nippon Suisan Gakkaishi 82: 569–580. https://doi.org/https://doi.org/10.2331/suisan.16-00008 Hagiwara K, Kimura K (2006) Fish fauna of shore waters in Hasama, Tateyama, Boso Peninsula. Memoirs of the Nat…

## Sheet: supplementary file 1c
Supplementary file 1c. Top 20 fish-fish interactions based on UIC
Causal fish species	Effect fish species	Transfer entropy	Interpretation1
Pseudoblennius marmoratus	Pseudolabrus eoethinus	0.427	Both species live in a rocky reef habitat. P. marmoratus is a relatively small piscivore that preys on small pelagic fishes, while P. eoethinus is a large carnivore that preys on benthic crustaceans. They are likely to share a microhabitat being alarmed with common predators, i.e., large piscivores, without competition for food.
Pseudoblennius marmoratus	Gymnothorax kidako	0.425	Although both are ferocious piscivores, the average size of the former is markedly smaller than that of the latter. Therefore, the former may be prey of the latter.
Girella punctata	Pseudolabrus eoethinus	0.417	G. punctata is omnivorous and mainly feeds on algae, while P. eoethinus mainly feeds on epibenthos, particularly large crustaceans. The feeding activity of the former is likely to expose the prey items of the latter.
Pseudolabrus eoethinus	Gymnothorax kidako	0.411	These fish species are both carnivorous and may conduct joint hunting, as has been reported for the grouper Plectropomus pessuliferus and giant moray eel Gymnothorax javanicus (Bshary et al., 2006). P. eoethinus is a large and solitary wrasse with a high body height, making it difficult to be preyed upon by G. kidako.
Gymnothorax kidako	Pseudolabrus eoethinus	0.36
Chaenogobius annularis	Takifugu niphobles	0.358	Both species are often found in the sandy bottom substrate. The former is generally smaller than the latter. The major prey items of the former are copepods and mysids, while the latter has strong teeth to brake hard-shell benthos. The latter is highly vulnerable to ectoparasitic copepods, which may be removed by the former.
Girella punctata	Pseudoblennius marmoratus	0.337	G. punctata feed on algae and this may provide an opportunity for P. marmoratus and G. kidako to feed on fish that hide in the algal bed.
Girella punctata	Gymnothorax kidako	0.334
Siganus fuscescens	Thalassoma cupido	0.33	The feeding activities of S. fuscescens and P. scalprum on algae may enhance those of T. cupido on epibenthos.
Prionurus scalprum	Thalassoma cupido	0.324
Thalassoma cupido	Kyphosus bigibbus	0.315	The feeding activity of T. cupido on epibenthos in the algal bed may facilitate K. bigibbus feeding on algae.
Siganus fuscescens	Kyphosus bigibbus	0.288	They are both herbivores. Although they may compete for food, they may collaborate in the alert of common predators.
Thalassoma cupido	Siganus fuscescens	0.286	Feeding on epibenthos by T. cupido may facilitate that of S. fuscescens on algae.
Chaenogobius annularis	Acanthopagrus schlegelii	0.28	Both C. annularis, a small goby, and A. schlegelii live in shallow waters, such as the surf zone and tide pools, and, thus, these fish species may interact.
Chaenogobius gulosus	Eviota abax	0.279	These fish species are goby species living in shallow waters, and, thus, they may interact.
Takifugu niphobles	Chaenogobius annularis	0.278	T. niphobles often burrows into sand and this may provide an opportunity for C. annularis to feed on endobenthos, such as amphipods.
Thalassoma cupido	Prionurus scalprum	0.269	The feeding of T. cupido on epibenthos may facilitate P. scalprum feeding on algae.
Sebastes spp.	Kyphosus bigibbus	0.268	All of these are combinations of the genus Sebastes and seaweed feeding species. Sebastes spp. have large eyes adapted to a low light intensity and are highly capable of detecting the approach of potential predators, while K. bigibbus and S. fuscescens feed on algae and may chase out small fish and shrimp that will become the prey of Sebastes spp.
Sebastes spp.	Siganus fuscescens	0.266
Kyphosus bigibbus	Sebastes spp.	0.262
Note that we selected strong interactions based on the values of transfer entropy.
1In the present study, information flow was typically found in species sharing a microhabitat, but not prey items. This is convincing because the eDNA times was taken at the time interval of twice a month, and thus the interactions detected by the time series analysis should also have the same time interval, which suggests that the interactions detected by our analysis could reflect behavioral in…
Bshary R, Hohner A, Ait-el-Djoudi K, Fricke H. (2006) Interspecific Communicative and Coordinated Hunting between Groupers and Giant Moray Eels in the Red Sea. PLOS Biol 4:e431. doi:10.1371/journal.pbio.0040431

## Sheet: supplementary file 1d
Supplementary file 1d. Results of GAMM between interaction strengths and environmental and ecological properties
Explained variable	Model formula	Linear mixed model component			General additive model component				Figure
		t-value	P-value		Effective DF	F-value	P-value
In-strength	abs(IS) ~ s(water_temp), random = fish_sp, site	1.17016	0.24194		4.99703	32.4621	< 2.0 × 10–16		Fig. 3a
In-strength	abs(IS) ~ s(sp_richness), random = fish_sp, site	0.747225	0.45493		2.86419	3.17151	0.0631403		Fig. 3b
In-strength	abs(IS) ~ s(total_eDNA), random = fish_sp, site	-1.42918	0.152956		2.97986	14.4775	< 2.0 × 10–16		Fig. 3c
Out-strength	abs(IS) ~ s(water_temp), random = fish_sp, site	0.707388	0.479327		4.79698	22.4843	< 2.0 × 10–16		Fig. 3d
Out-strength	abs(IS) ~ s(sp_richness), random = fish_sp, site	-4.93441	8.1 × 10–7		1	24.3486	8.2 × 10–7		Fig. 3e
Out-strength	abs(IS) ~ s(total_eDNA), random = fish_sp, site	-2.86103	0.00422362		5.60746	36.6038	< 2.0 × 10–16		Fig. 3f
In-strength	abs(IS) ~ s(salinity), random = fish_sp, site	0.444607	0.656605		4.20045	6.71143	2.2 × 10–5		Fig. S4a
In-strength	abs(IS) ~ s(tide), random = fish_sp, site	-4.93144	8.2 × 10–7		1.00002	24.3208	8.4 × 10–7		Fig. S4b
In-strength	abs(IS) ~ s(wave), random = fish_sp, site	1.36804	0.171303		2.84053	4.68499	0.00233707		Fig. S4c
Out-strength	abs(IS) ~ s(salinity), random = fish_sp, site	-0.895868	0.370326		7.70007	3.28024	6.2 × 10–4		Fig. S4d
Out-strength	abs(IS) ~ s(tide), random = fish_sp, site	0.647485	0.51732		1.00007	0.419302	0.517286		Fig. S4e
Out-strength	abs(IS) ~ s(wave), random = fish_sp, site	2.81415	0.00489166		3.92852	7.8179	6.5 × 10–6		Fig. S4f
"s()" indicates smoothing term.
"random" indicates random effect term.
Bold numbers indicate statistically clear effects.
